# Supplementary material
Source: PubMed Central journal article supplement (PMC2656112)

## Supporting Information

# Nucleophilic Addition of Organozinc Reagents to 2-Sulfonyl Cyclic Ethers: Stereoselective Synthesis of Manassantins A and B

*Hyongsu Kim,<sup>†</sup> Amanda C. Kasper,<sup>†</sup> Eui Jung Moon,<sup>‡</sup> Yongho Park,<sup>†</sup> Ceshea M. Wooten,<sup>†</sup>  
Mark W. Dewhirst,<sup>\*,‡,§</sup> and Jiyong Hong<sup>\*,†</sup>*

*<sup>†</sup>Department of Chemistry, Duke University, Durham, North Carolina 27708*

*<sup>‡</sup>Department of Pathology, Duke University Medical Center, Durham, North Carolina 27708*

*<sup>§</sup>Department of Radiation Oncology, Duke University Medical Center, Durham,  
North Carolina 27708.*

\* To whom correspondence should be addressed.

E-mail: [jiyong.hong@duke.edu](mailto:jiyong.hong@duke.edu); [dewhi001@mc.duke.edu](mailto:dewhi001@mc.duke.edu)

| <b>Contents</b>                                  | <b>Page Number</b> |
|--------------------------------------------------|--------------------|
| Experimental Section                             | S2                 |
| Biological Assay                                 | S19                |
| Copies of <sup>1</sup> H and <sup>13</sup> C NMR | S20                |

## Preparation of Sulfone 5

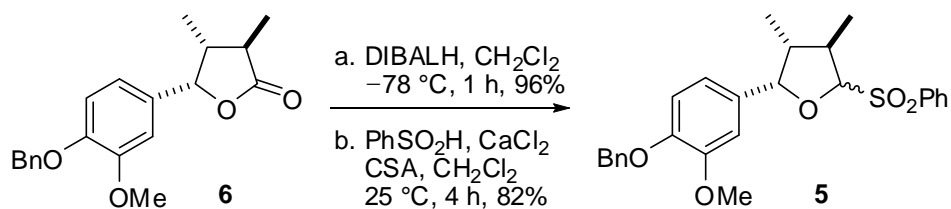

**[DIBALH Reduction]** To a cooled (-78 °C) solution of lactone **6** (298.7 mg, 0.915 mmol) in CH<sub>2</sub>Cl<sub>2</sub> (5 mL, 0.183 M) was added dropwise DIBALH (1.10 mL, 1.0 M solution in toluene, 1.10 mmol). After being stirred at the same temperature for 1 h, the reaction was quenched with MeOH (0.5 mL). H<sub>2</sub>O (2 mL) and 2 N NaOH (2 mL) were added and the resulting mixture was stirred at 25 °C for 1 h. The layers were separated, and the aqueous layer was extracted with CH<sub>2</sub>Cl<sub>2</sub> (2 × 10 mL). The combined organic layers were dried over anhydrous Na<sub>2</sub>SO<sub>4</sub>, and concentrated *in vacuo*. The residue was purified by column chromatography (silica gel, hexanes/EtOAc, 2/1) to afford lactol (287.1 mg, 96%) as a colorless oil.

**[Sulfonylation]** To a solution of stirred solution of the above lactol (142.3 mg, 0.433 mmol) in CH<sub>2</sub>Cl<sub>2</sub> (5 mL) was added PhSO<sub>2</sub>H (123.1 mg, 0.866 mmol), camphorsulfonic acid (catalytic amount), and CaCl<sub>2</sub> (140.0 mg) at 25 °C. After being stirred at the same temperature for 4 h, the reaction mixture was quenched with saturated aqueous NaHCO<sub>3</sub> (5 mL) and diluted with EtOAc (10 mL). The layers were separated, and the aqueous layer was extracted with EtOAc (2 × 10 mL). The combined organic layers were washed with brine, and dried over anhydrous Na<sub>2</sub>SO<sub>4</sub>, and concentrated *in vacuo*. The residue was purified by column chromatography (silica gel, hexanes/EtOAc, 2/1) to afford a 3:1 diastereomeric mixture of sulfone **5** as a white foam (161.3 mg, 82%): **[For Major Diastereomer]** R<sub>f</sub> 0.40 (hexanes/EtOAc, 4/1); <sup>1</sup>H NMR (400 MHz, CDCl<sub>3</sub>) δ 7.93 (dd, *J* = 8.0, 1.2 Hz, 2 H), 7.61 (dd, *J* = 7.2, 7.2 Hz, 1 H), 7.53 (dd, *J*

= 8.0, 7.2 Hz, 2 H), 7.26–7.41 (m, 5 H), 6.79 (d,  $J = 8.0$  Hz, 1 H), 6.60 (d,  $J = 2.0$  Hz, 1 H), 6.56 (d,  $J = 8.0, 2.0$  Hz, 1 H), 5.50 (d,  $J = 8.8$  Hz, 1 H), 5.11 (s, 4 H), 5.05 (d,  $J = 7.2$  Hz, 1 H), 3.84 (s, 3 H), 2.84–2.96 (m, 1 H), 2.38–2.50 (m, 1 H), 1.56 (d,  $J = 7.2$  Hz, 3 H), 0.68 (d,  $J = 6.8$  Hz, 3 H);  $^{13}\text{C}$  NMR (100 MHz,  $\text{CDCl}_3$ )  $\delta$  149.3, 147.5, 138.4, 136.9, 133.5, 132.6, 129.0, 128.8, 128.4, 127.7, 127.1, 118.6, 113.6, 110.3, 96.1, 86.0, 70.9, 55.9, 43.5, 42.2, 14.3, 12.1; HRMS (FAB) found 452.1656 [calcd for  $\text{C}_{26}\text{H}_{28}\text{O}_5\text{S}$  ( $\text{M}$ ) $^+$  452.1657]

### Preparation of 2,3-*Cis*-3,4-*Trans*-4,5-*Cis*-Tetrahydrofuran 3a

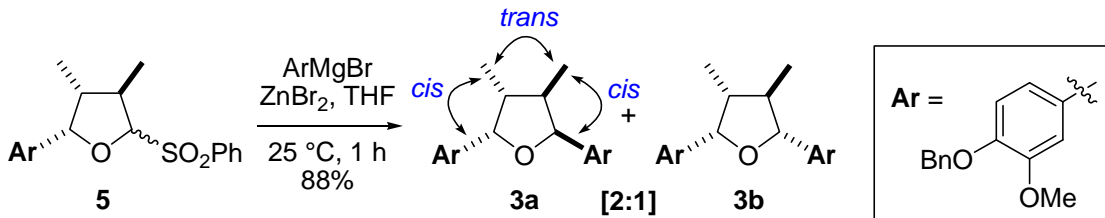

To a solution of  $\text{ZnBr}_2$  (1 mL, 0.26 M in THF) was added dropwise 4-benzyloxy-3-methoxyphenylmagnesium bromide (1.66 mL, 0.30 M in THF, 0.50 mmol) at 25 °C and the resulting mixture was stirred for 30 min before sulfone **5** (98.1 mg, 0.217 mmol) in THF (2 mL) was added dropwise. After being stirred for 1 h, the reaction mixture was cooled to 0 °C, quenched with saturated aqueous  $\text{NH}_4\text{Cl}$ , and diluted with EtOAc. The layers were separated, and the aqueous layer was extracted with EtOAc ( $2 \times 10$  mL). The combined organic layers were washed with brine, dried over anhydrous  $\text{Na}_2\text{SO}_4$ , and concentrated *in vacuo*. The residue was purified by column chromatography (silica gel, hexanes/EtOAc, 4/1) to afford a 2:1 mixture of 2,3-*cis*-3,4-*trans*-4,5-*cis*-tetrahydrofuran **3a** and 2,3-*cis*-3,4-*trans*-4,5-*trans*-tetrahydrofuran **3b** as a colorless oil (102.1 mg, 88%), which was purified again by column chromatography (silica gel, hexanes/EtOAc, 7/1) to afford 2,3-*cis*-3,4-*trans*-4,5-*cis*-

tetrahydrofuran **3a** (59.2 mg, 52%) and 2,3-*cis*-3,4-*trans*-4,5-*trans*-tetrahydrofuran **3b** (28.3 mg, 25%) and a mixture of **3a** and **3b** (12.0 mg, 11%): [**For 3a**]  $R_f$  0.43 (hexanes/EtOAc, 4/1);  $[\alpha]^{24.7}_D = -35.3$  ( $c$  1.00,  $\text{CHCl}_3$ )  $^1\text{H NMR}$  (400 MHz,  $\text{CDCl}_3$ )  $\delta$  7.24–7.45 (m, 10 H), 6.84–6.86 (m, 4 H), 6.76 (d,  $J = 8.0$  Hz, 2 H), 5.41 (d,  $J = 5.6$  Hz, 2 H), 5.14 (s, 4 H), 3.89 (s, 6 H), 2.19–2.29 (m, 2 H), 0.68 (d,  $J = 6.4$  Hz, 6 H);  $^{13}\text{C NMR}$  (100 MHz,  $\text{CDCl}_3$ )  $\delta$  149.7, 147.3, 137.6, 135.0, 128.8, 128.1, 127.6, 118.7, 114.1, 110.5, 83.8, 71.5, 56.4, 44.3, 15.1; HRMS (FAB) found 524.2570 [calcd for  $\text{C}_{34}\text{H}_{36}\text{O}_5$  ( $\text{M}$ ) $^+$  524.2563]; [**For 3b**]  $R_f$  0.40 (hexanes/EtOAc, 4/1);  $[\alpha]^{30}_D = -20.1$  ( $c$  0.80,  $\text{CHCl}_3$ );  $^1\text{H NMR}$  (400 MHz,  $\text{CDCl}_3$ )  $\delta$  7.28–7.47 (m, 10 H), 7.10 (d,  $J = 1.6$  Hz, 1 H), 6.98 (dd,  $J = 7.2, 2.0$  Hz, 1 H), 6.80–6.91 (m, 4 H), 5.18 (s, 2 H), 5.15 (s, 2 H), 5.12 (d,  $J = 8.4$  Hz, 1 H), 4.42 (d,  $J = 9.6$  Hz, 1 H), 3.92 (s, 3 H), 3.85 (s, 3 H), 2.55 (dddd,  $J = 9.2, 7.2, 7.2, 7.2$  Hz, 1 H), 1.74–1.82 (m, 1 H), 1.07 (d,  $J = 7.2$  Hz, 3 H), 0.67 (d,  $J = 6.8$  Hz, 3 H);  $^{13}\text{C NMR}$  (100 MHz,  $\text{CDCl}_3$ )  $\delta$  149.6, 149.2, 147.7, 147.1, 137.2, 134.4, 134.0, 128.44, 128.41, 127.7, 127.23, 127.18, 119.1, 118.5, 113.9, 113.6, 110.9, 110.5, 87.2, 83.0, 71.0, 55.94, 55.87, 47.7, 45.9, 14.97, 14.88; IR (neat) 2955, 2869, 1511  $\text{cm}^{-1}$ ; HRMS (FAB) found 524.2571 [calcd for  $\text{C}_{34}\text{H}_{36}\text{O}_5$  ( $\text{M}$ ) $^+$  524.2563]

#### Preparation of 2,3-*Cis*-3,4-*Trans*-4,5-*Cis*-Tetrahydrofuran 10a

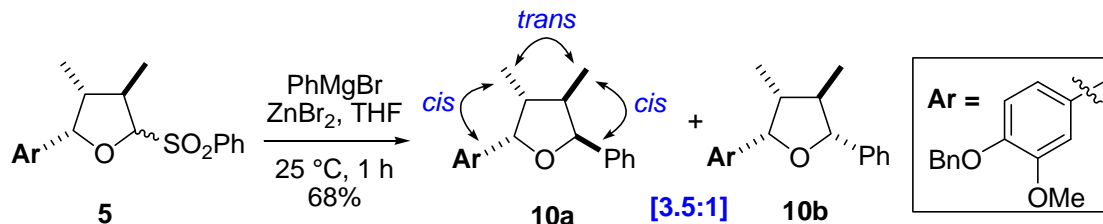

To a solution of  $\text{ZnBr}_2$  (1 mL, 0.12 M in THF, 0.12 mmol) was added dropwise phenylmagnesium bromide (0.19 mL, 1.0 M in THF, 0.19 mmol) at 25 °C and the resulting mixture was stirred at the same temperature for 30 min before sulfone **5** (21.9 mg, 0.048 mmol)

in THF (1 mL) was added dropwise. After being stirred for 1 h, the reaction mixture was cooled to 0 °C, quenched with saturated aqueous NH<sub>4</sub>Cl, and diluted with EtOAc. The layers were separated, and the aqueous layer was extracted with EtOAc (2 × 10 mL). The combined organic layers were washed with brine, dried over anhydrous Na<sub>2</sub>SO<sub>4</sub>, and concentrated *in vacuo*. The residue was purified by column chromatography (silica gel, hexanes/EtOAc, 4/1) to afford a 3.5:1 mixture of 2,3-*cis*-3,4-*trans*-4,5-*cis*-tetrahydrofuran **10a** and 2,3-*cis*-3,4-*trans*-4,5-*trans*-tetrahydrofuran **10b** as a colorless oil (12.7 mg, 68%): [**10a**] R<sub>f</sub> 0.31 (hexanes/EtOAc, 9/1); [ $\alpha$ ]<sup>30</sup><sub>D</sub> = -30.1 (*c* 0.64, CHCl<sub>3</sub>); <sup>1</sup>H NMR (400 MHz, CDCl<sub>3</sub>)  $\delta$  7.24–7.46 (m, 10 H), 6.90 (s, 1 H), 6.89 (d, *J* = 8.4 Hz, 1 H), 6.79 (dd, *J* = 8.4, 2.0 Hz, 1 H), 5.50 (d, *J* = 6.8 Hz, 1 H), 5.46 (d, *J* = 6.4 Hz, 1 H), 5.16 (s, 2 H), 3.92 (s, 3 H), 2.22–2.36 (m, 2 H), 0.70 (d, *J* = 6.8 Hz, 3 H), 0.68 (d, *J* = 6.8 Hz, 3 H); <sup>13</sup>C NMR (100 MHz, CDCl<sub>3</sub>)  $\delta$  149.3, 147.0, 141.4, 137.3, 134.7, 128.4, 127.86, 127.70, 127.3, 126.8, 126.2, 118.4, 113.8, 110.2, 83.69, 83.57, 71.1, 56.0, 43.83, 43.75, 14.69, 14.61; IR (neat) 2962, 2873, 1512 cm<sup>-1</sup>; HRMS (FAB) found 388.2040 [calcd for C<sub>26</sub>H<sub>28</sub>O<sub>3</sub> (M)<sup>+</sup> 388.2038]; [**10b**] R<sub>f</sub> 0.29 (hexanes/EtOAc, 9/1); [ $\alpha$ ]<sup>29</sup><sub>D</sub> = -73.7 (*c* 0.89, CHCl<sub>3</sub>); <sup>1</sup>H NMR (400 MHz, CDCl<sub>3</sub>)  $\delta$  7.26–7.53 (m, 10 H), 6.93 (d, *J* = 1.6 Hz, 1 H), 6.81–6.88 (m, 2 H), 5.15 (s, 2 H), 5.14 (d, *J* = 10.4 Hz, 1 H), 4.47 (d, *J* = 9.2 Hz, 1 H), 3.88 (s, 3 H), 2.20–2.32 (m, 1 H), 1.74–1.84 (m, 1 H), 1.08 (d, *J* = 6.8 Hz, 3 H), 0.65 (d, *J* = 6.8 Hz, 3 H); <sup>13</sup>C NMR (100 MHz, CDCl<sub>3</sub>)  $\delta$  149.3, 147.2, 141.0, 137.3, 134.4, 128.47, 128.37, 127.74, 127.61, 127.3, 126.4, 119.2, 113.7, 110.9, 87.4, 83.1, 71.1, 55.9, 48.3, 46.1, 15.0; HRMS (FAB) found 388.2035 [calcd for C<sub>26</sub>H<sub>28</sub>O<sub>3</sub> (M)<sup>+</sup> 388.2038];

## Preparation of Sulfone 9

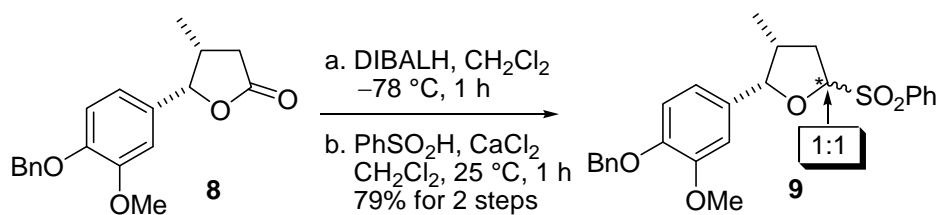

**[DIBALH Reduction]** To a cooled (-78 °C) solution of lactone **8**<sup>1</sup> (272.5 mg, 0.872 mmol) in CH<sub>2</sub>Cl<sub>2</sub> (10 mL, 0.087 M) was added dropwise DIBALH (1.02 mL, 1.0 M solution in toluene, 1.02 mmol). After being stirred at the same temperature for 1 h, the reaction was quenched with MeOH (0.5 mL). H<sub>2</sub>O (2 mL) and 2 N NaOH (2 mL) was added and the resulting mixture was stirred at 25 °C for 1 h. The layers were separated, and the aqueous layer was extracted with CH<sub>2</sub>Cl<sub>2</sub> (2 × 10 mL). The combined organic layers were dried over anhydrous Na<sub>2</sub>SO<sub>4</sub>, and concentrated *in vacuo*. This crude lactol was carried to the next step without further purification. HRMS (FAB) found 314.1517 [calcd for C<sub>19</sub>H<sub>22</sub>O<sub>4</sub> (M)<sup>+</sup> 314.1518]

**[Sulfonylation]** To a solution of stirred solution of lactol in CH<sub>2</sub>Cl<sub>2</sub> (2 mL) was added PhSO<sub>2</sub>H (495.9 mg, 3.488 mmol) and CaCl<sub>2</sub> (193.5 mg, 1.74 mmol) at 25 °C. After 1 h, the reaction was quenched with saturated aqueous NaHCO<sub>3</sub> (5 mL) and diluted with Et<sub>2</sub>O (10 mL). The layers were separated, and the aqueous layer was extracted with EtOAc (2 × 10 mL). The combined organic layers were washed with brine, and dried over anhydrous Na<sub>2</sub>SO<sub>4</sub>, and concentrated *in vacuo*. The residue was purified by column chromatography (silica gel, hexanes/EtOAc, 2/1) to afford a 1:1 diastereomeric mixture of sulfone **9** as a white foam (302.5 mg, 79%): R<sub>f</sub> 0.50 (hexanes/EtOAc, 2/1); IR (neat) 2928, 2869, 2870, 1513 cm<sup>-1</sup>; HRMS (FAB) found 438.1501 [calcd for C<sub>26</sub>H<sub>26</sub>O<sub>5</sub>S (M)<sup>+</sup> 438.1501]

### Preparation of 2,3-Cis-2,5-Trans-Tetrahydrofuran 11a

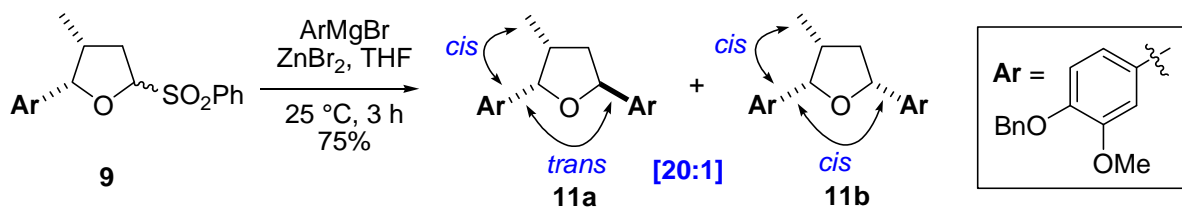

To a solution of ZnBr<sub>2</sub> (1 mL, 0.771 M in THF) was added dropwise 4-benzyloxy-3-methoxyphenylmagnesium bromide (4.28 mL, 0.3 M in THF, 1.28 mmol) at 25 °C and the resulting mixture was stirred at the same temperature for 30 min before sulfone **9** (112.9 mg, 0.257 mmol) in THF (2 mL) was added dropwise. After being stirred for 1 h, the reaction mixture was cooled to 0 °C, quenched with saturated aqueous NH<sub>4</sub>Cl, and diluted with EtOAc. The layers were separated, and the aqueous layer was extracted with EtOAc (2 × 10 mL). The combined organic layers were washed with brine, dried over anhydrous Na<sub>2</sub>SO<sub>4</sub>, and concentrated *in vacuo*. The residue was purified by column chromatography (silica gel, hexanes/EtOAc, 7/1) to afford 2,3-cis-2,5-trans-tetrahydrofuran **11a** as a colorless oil (102.1 mg, 75%): R<sub>f</sub> 0.68 (hexanes/EtOAc, 3/1 developed twice); [α]<sub>D</sub><sup>29</sup> = -73.7 (*c* 0.89, CHCl<sub>3</sub>); <sup>1</sup>H NMR (400 MHz, CDCl<sub>3</sub>) δ 7.27–7.45 (m, 10 H), 6.76–6.97 (m, 6 H), 5.31 (dd, *J* = 7.2, 7.2 Hz, 1 H), 5.30 (d, *J* = 6.4 Hz), 5.15 (s, 4 H), 3.90 (s, 6 H), 2.58 (dddd, *J* = 6.4, 6.4, 6.4, 6.4, 6.4 Hz, 1 H), 2.16–2.19 (m, 2 H), 0.70 (d, *J* = 7.2 Hz, 3 H); <sup>13</sup>C NMR (100 MHz, CDCl<sub>3</sub>) δ 149.5, 149.2, 147.0, 146.8, 137.5, 137.1, 133.7, 128.2, 127.5, 127.1, 127.0, 118.0, 127.2, 113.8, 113.6, 109.9, 109.1, 83.9, 79.0, 70.9, 55.8, 42.7, 38.2, 14.8; IR (neat) 2932, 1510 cm<sup>-1</sup>; HRMS (FAB) found 510.2401 [calcd for C<sub>33</sub>H<sub>34</sub>O<sub>5</sub> (M)<sup>+</sup> 510.2406]

## Preparation of Lactone **12**

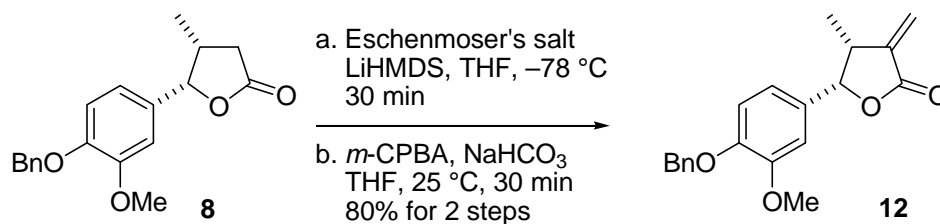

**[Mannich Reaction]** To a cooled ( $-78\text{ }^{\circ}\text{C}$ ) solution of lactone **8** (83.7 mg, 0.268 mmol) in THF (2 mL, 0.134 M) was added LiHMDS (0.536 mL, 1.0 M solution in THF, 0.536 mmol). The resulting mixture was stirred at the same temperature for 30 min and Eschenmoser's salt (148.7 mg, 0.804 mmol) in THF (1 mL) was added. After being stirred at the same temperature for another 15 min, the reaction mixture was quenched with saturated aqueous  $\text{NH}_4\text{Cl}$  solution, and diluted with  $\text{CH}_2\text{Cl}_2$ . The layers were separated, and the aqueous layer was extracted with ( $2 \times 15\text{ mL}$ ). The combined organic layers were dried over anhydrous  $\text{Na}_2\text{SO}_4$ , and concentrated *in vacuo* to afford the crude amine. This amine was carried to the next step without further purification. **[Elimination]** To a solution of the above amine in THF (4 mL) and saturated aqueous  $\text{NaHCO}_3$  (2 mL) was added *m*-CPBA (231.2 mg, max. 78%, 1.05 mmol) at  $0\text{ }^{\circ}\text{C}$ . The resulting mixture was allowed to warm to  $25\text{ }^{\circ}\text{C}$  for 30 min, and quenched with saturated aqueous  $\text{NaHCO}_3$  solution and saturated aqueous  $\text{Na}_2\text{SO}_3$  solution. The layers were separated, and the aqueous layer was extracted with EtOAc ( $2 \times 15\text{ mL}$ ). The combined organic layer was washed with 2 N NaOH and brine, dried over anhydrous  $\text{Na}_2\text{SO}_4$ , and concentrated *in vacuo*. The residue was purified by column chromatography (silica gel, hexanes/EtOAc, 2/1) to afford lactone **12** as a colorless oil (69.2 mg, 80% for two steps):  $R_f$  0.48 (hexanes/EtOAc, 2/1);  $[\alpha]_D^{30} = +33.1$  ( $c$  1.86,  $\text{CHCl}_3$ );  $^1\text{H NMR}$  (400 MHz,  $\text{CDCl}_3$ )  $\delta$  7.26–7.43 (m, 5 H), 6.85 (d,  $J = 8.4\text{ Hz}$ , 1 H), 6.62–6.67 (m, 2 H), 6.30 (d,  $J = 2.4\text{ Hz}$ , 1 H),



5.53–5.56 (m, 2 H), 5.12 (s, 2 H), 3.84 (s, 3 H), 3.33–3.41 (m, 1 H), 0.80 (d,  $J = 7.2$  Hz, 3 H);  $^{13}\text{C}$  NMR (100 MHz,  $\text{CDCl}_3$ )  $\delta$  170.4, 149.5, 148.1, 140.1, 136.8, 129.2, 128.4, 127.7, 127.2, 121.4, 118.4, 113.6, 109.5, 82.0, 70.9, 55.9, 38.9, 15.2; IR (neat) 1764, 1516  $\text{cm}^{-1}$ ; HRMS (FAB) found 324.1360 [calcd for  $\text{C}_{20}\text{H}_{20}\text{O}_4$  (M) $^+$  324.1362]

### Preparation of Sulfone **13**

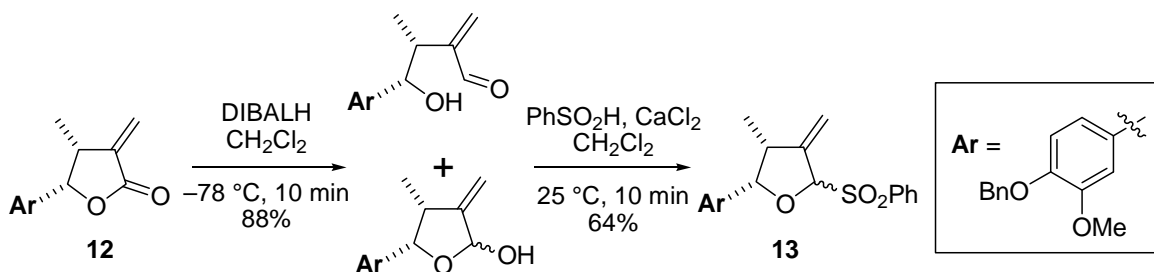

**[DIBALH Reduction]** To a cooled ( $-78\text{ }^\circ\text{C}$ ) solution of lactone **12** (101.1 mg, 0.312 mmol) in  $\text{CH}_2\text{Cl}_2$  (8 mL, 0.039 M) was added DIBALH (0.312 mL, 1.0 M solution in toluene, 0.312 mmol). After being stirred at the same temperature for 10 min, the reaction was quenched with MeOH. Then  $\text{H}_2\text{O}$  and 2 N NaOH was added and the resulting mixture was stirred at  $25\text{ }^\circ\text{C}$  for 1 h. The layers were separated, and the aqueous layer was extracted with  $\text{CH}_2\text{Cl}_2$  ( $2 \times 10$  mL). The combined organic layers were dried over anhydrous  $\text{Na}_2\text{SO}_4$ , and concentrated *in vacuo*. The residue was purified by column chromatography (silica gel, hexanes/EtOAc, 2/1) to afford a mixture of lactol and aldehyde as a colorless oil (89.7 mg, 88%). **[Sulfonylation]** To a stirred solution of a mixture of lactol and aldehyde (28.5 mg, 0.0873 mmol) in  $\text{CH}_2\text{Cl}_2$  (3 mL, 0.029 M) were added  $\text{PhSO}_2\text{H}$  (16.1 mg, 0.114 mmol) and  $\text{CaCl}_2$  (29.1 mg, 0.262 mmol) at  $25\text{ }^\circ\text{C}$ . After being stirred at the same temperature for 10 min, the reaction mixture was quenched with saturated aqueous  $\text{NaHCO}_3$ , and diluted with  $\text{Et}_2\text{O}$  (15 mL). The layers were separated, and the aqueous layer was extracted with EtOAc ( $2 \times 10$  mL). The combined organic layers were

washed with brine, dried over anhydrous Na<sub>2</sub>SO<sub>4</sub>, and concentrated *in vacuo*. The residue was purified by column chromatography (silica gel, hexanes/EtOAc/Et<sub>3</sub>N, 3/1/0.01) to afford sulfone **13** as a white foam (24.0 mg, 64%): R<sub>f</sub> 0.61 (hexanes/EtOAc, 2/1); [**For Major Diastereomer**] <sup>1</sup>H NMR (400 MHz, CDCl<sub>3</sub>) δ 7.96 (d, *J* = 7.2 Hz, 2 H), 7.63 (d, *J* = 7.2, 7.2 Hz, 1 H), 7.54 (dd, *J* = 7.2, 7.2 Hz, 2 H), 7.25–7.45 (m, 5 H), 6.80 (d, *J* = 8.4 Hz, 1 H), 6.63 (s, 1 H), 6.58 (d, *J* = 8.4 Hz, 1 H), 5.74 (s, 1 H), 5.52 (d, *J* = 8.0 Hz, 1 H), 5.47 (s, 1 H), 5.42 (s, 1 H), 5.11 (s, 2 H), 3.82 (s, 3 H), 3.21–3.26 (m, 1 H), 0.71 (d, *J* = 7.2 Hz, 3 H).

#### Preparation of 2,3-*Cis*-2,5-*Trans*-Tetrahydrofuran **14**

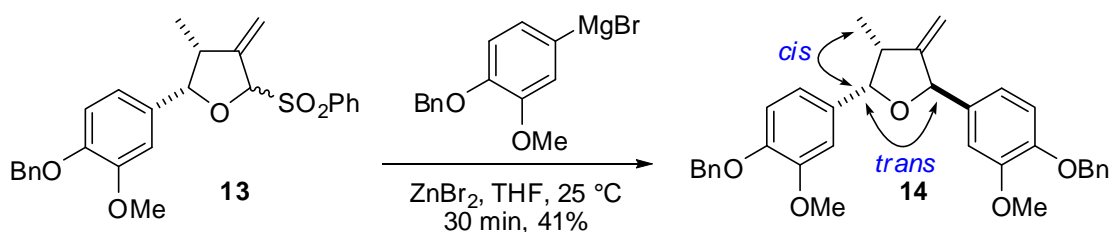

To a solution of ZnBr<sub>2</sub> (1 mL, 0.22 M in THF) was added dropwise 4-benzyloxy-3-methoxyphenylmagnesium bromide (2.78 mL, 0.16 M, 0.44 mmol) at 25 °C. The resulting mixture was stirred at the same temperature for 30 min before sulfone **13** (40.0 mg, 0.088 mmol) in THF (1 mL) was added dropwise. After being stirred at 25 °C for 30 min, the reaction mixture was cooled to 0 °C, quenched with saturated aqueous NH<sub>4</sub>Cl, and diluted with EtOAc. The layers were separated, and the aqueous layer was extracted with EtOAc (2 × 10 mL). The combined organic layers were washed with brine, and dried over anhydrous Na<sub>2</sub>SO<sub>4</sub>, and concentrated *in vacuo*. The residue was purified by column chromatography (silica gel, hexanes/EtOAc, 6/1) to afford 2,3-*cis*-2,5-*trans*-tetrahydrofuran **14** as a colorless oil (19.1 mg, 41%): R<sub>f</sub> 0.57 (hexanes/EtOAc, 7/1 × 3); [α]<sub>D</sub><sup>30</sup> = +39.2 (*c* 0.32, CHCl<sub>3</sub>); <sup>1</sup>H NMR (400 MHz, CDCl<sub>3</sub>) δ 7.26–7.44 (m, 10 H), 6.73–6.99 (m, 6 H), 6.30 (d, *J* = 2.4 Hz, 1 H), 5.76 (d, *J* = 7.2

Hz, 1 H), 5.66 (s, 1 H), 5.15 (s, 2 H), 5.14 (s, 2 H), 5.05 (s, 1 H), 4.99 (s, 1 H), 3.90 (s, 3 H), 3.88 (s, 3 H), 3.08–3.13 (m, 1 H), 0.81 (d,  $J = 7.2$  Hz, 3 H);  $^{13}\text{C}$  NMR (100 MHz,  $\text{CDCl}_3$ )  $\delta$  155.7, 149.6, 149.4, 147.7, 147.4, 137.2, 135.5, 133.3, 128.5, 127.7, 127.26, 127.21, 119.0, 118.6, 113.8, 110.6, 110.3, 106.7, 83.6, 82.5, 71.0, 56.0, 42.2, 14.3; HRMS (FAB) found 522.2409 [calcd for  $\text{C}_{26}\text{H}_{26}\text{O}_5\text{S}$  ( $\text{M})^+$  522.2406].

**Preparation of 2,3-Cis-3,4-Trans-4,5-Cis-Tetrahydrofuran 3a via Asymmetric Hydrogenation of 14 with Ir-(4S,5S)-ThrePHOX**

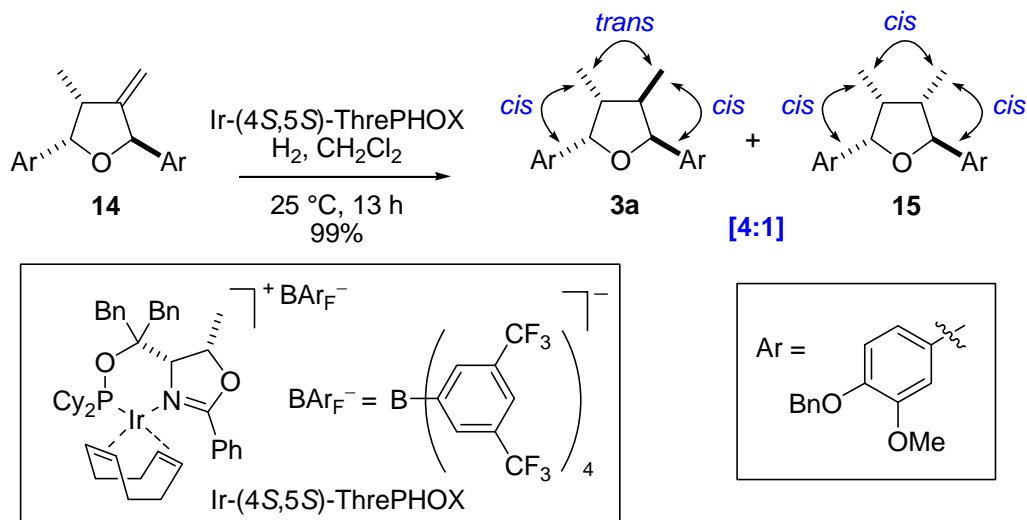

To a solution of **14** (107.1 mg, 0.205 mmol) in  $\text{CH}_2\text{Cl}_2$  (5 mL) was added **Ir-(4S,5S)-ThrePHOX** (3.5 mg, 0.002 mmol) at  $25\text{ }^\circ\text{C}$  under  $\text{H}_2$  atmosphere, and the reaction mixture was stirred at the same temperature for 1 h. An addition of **Ir-(4S,5S)-ThrePHOX** (3.5 mg, 0.002 mmol) was repeated two times every 1 h, and the reaction mixture was stirred further for 10 h before concentrated *in vacuo*. The residue was filtrated through a pad of silica gel (hexanes/EtOAc, 3/1) to afford a 4:1 mixture of 2,3-cis-3,4-trans-4,5-cis-tetrahydrofuran **3a** and 2,3-cis-3,4-cis-4,5-trans-tetrahydrofuran **15**, which was purified by column

chromatography (silica gel, hexanes/EtOAc, 10/1) to afford 2,3-*cis*-3,4-*trans*-4,5-*cis*-tetrahydrofuran **3a** (66.3 mg, 62%), 2,3-*cis*-3,4-*cis*-4,5-*trans*-tetrahydrofuran **15** (19.9 mg, 18%), and a mixture of **3a** and **15** (20.1 mg, 19%). [For 2,3-*cis*-3,4-*cis*-4,5-*trans*-tetrahydrofuran **15**] <sup>1</sup>H NMR (400 MHz, CDCl<sub>3</sub>) δ 7.26–7.44 (m, 10 H), 6.97 (s, 1 H), 6.94 (s, 1 H), 6.81–6.85 (m, 3 H), 6.78 (d, *J* = 8.0 Hz, 1 H), 5.44 (d, *J* = 4.0 Hz, 1 H), 5.148 (s, 2 H), 5.142 (s, 2 H), 4.64 (d, *J* = 8.8 Hz, 1 H), 3.90 (s, 3 H), 3.88 (s, 6 H), 2.36–2.48 (m, 2 H), 0.99 (d, *J* = 5.2 Hz, 3 H), 0.61 (d, *J* = 6.4 Hz, 3 H).

### Preparation of Bis-Phenol **16**

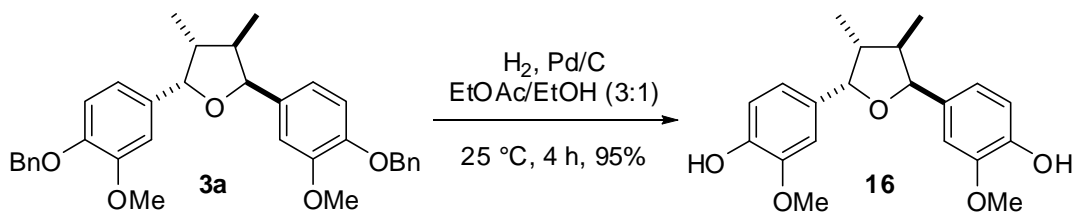

To a stirred solution of bis-benzyl ether **3a** (112 mg, 0.21 mmol) in EtOAc/EtOH (3:1, 4 mL) was added 10% palladium on activated carbon (22.4 mg, 20 wt %). The resulting mixture was stirred under H<sub>2</sub> atmosphere at 25 °C for 4 h. The reaction mixture was then filtered through celite with EtOAc and concentrated *in vacuo*. The residue was purified by column chromatography (silica gel, hexanes/EtOAc, 3/1) to afford bis-phenol **16** as a colorless oil (70 mg, 95%): R<sub>f</sub> 0.33 (hexanes/EtOAc, 2/1); [α]<sup>24.7</sup><sub>D</sub> = −35.3 (*c* 1.00, CHCl<sub>3</sub>); <sup>1</sup>H NMR (400 MHz, CDCl<sub>3</sub>) δ 6.88 (d, *J* = 8.0 Hz, 2 H), 6.82 (s, 2 H), 6.75 (d, *J* = 8.0 Hz, 2 H), 5.63 (s, 2 H), 5.41 (d, *J* = 6.0 Hz, 2 H), 3.87 (s, 6 H), 2.18–2.28 (m, 2 H), 0.67 (d, *J* = 6.0 Hz, 6 H); <sup>13</sup>C NMR (100 MHz, CDCl<sub>3</sub>) δ 146.6, 144.7, 133.7, 119.4, 114.2, 109.2, 83.9, 56.3, 44.3, 15.0; IR (neat) 3420, 2964, 2932, 1515, 1269, 1035 cm<sup>−1</sup>; HRMS (FAB) found 344.1617 [calcd for C<sub>20</sub>H<sub>24</sub>O<sub>5</sub> (M)<sup>+</sup> 344.1624]

### (S)- $\alpha$ -Tosyl Aryl Ketone **17**<sup>2</sup>

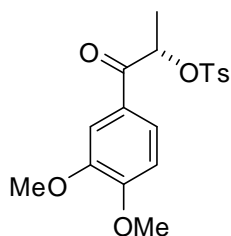

**17**

$[\alpha]_{D}^{28.2} = +2.76$  ( $c$  0.54,  $\text{CHCl}_3$ );  $R_f$  0.52 (hexanes/EtOAc, 3/1);  $^1\text{H NMR}$  (400 MHz,  $\text{CDCl}_3$ )  $\delta$  7.74 (d,  $J = 7.6$  Hz, 2 H), 7.56 (dd,  $J = 8.4, 2.0$  Hz, 1 H), 7.42 (s, 1 H), 7.24 (d,  $J = 8.4$  Hz, 2 H), 6.86 (d,  $J = 8.4$  Hz, 1 H), 5.75 (ddd,  $J = 6.8, 6.8, 6.8$  Hz, 1 H), 3.92 (s, 3 H), 3.89 (s, 3 H), 2.39 (s, 3 H), 1.55 (d,  $J = 6.8$  Hz, 3 H);  $^{13}\text{C NMR}$  (100 MHz,  $\text{CDCl}_3$ )  $\delta$  193.4, 154.3, 149.6, 145.3, 133.9, 130.1, 128.2, 127.0, 123.9, 111.2, 110.4, 56.47, 56.34, 22.0, 19.2; IR (neat) 2961, 1684, 1514, 1263, 1173, 1017, 927  $\text{cm}^{-1}$ ; HRMS (FAB) found 364.0981 [calcd for  $\text{C}_{18}\text{H}_{20}\text{O}_6\text{S}$  ( $\text{M}$ )<sup>+</sup> 364.0981]

### Preparation of Bis-Ketone **18**

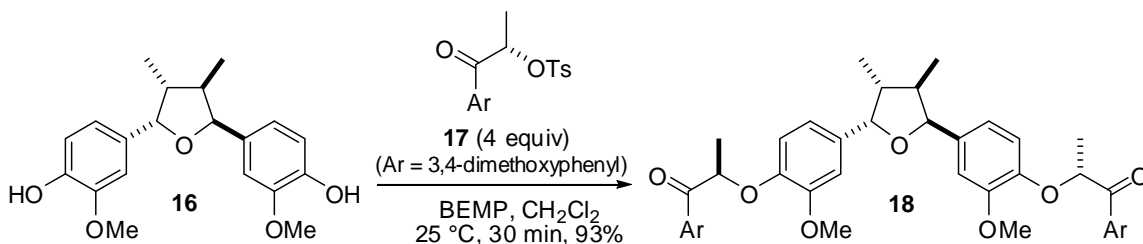

To a cooled (0 °C) solution of bis-phenol **16** (29.8 mg, 0.086 mmol) in dry  $\text{CH}_2\text{Cl}_2$  (1.0 mL, 0.086 M) was added dropwise 2-*tert*-butylimino-2-diethylamino-1,3-dimethylphosphorane (BEMP, 30  $\mu\text{L}$ , 0.10 mmol). The resulting mixture was stirred at the same temperature for 10 min before **17** (126.0 mg, 0.346 mmol) in  $\text{CH}_2\text{Cl}_2$  (1.0 mL) was added. The reaction mixture was allowed to warm to 25 °C for 30 min with stirring, quenched with

saturated aqueous  $\text{NH}_4\text{Cl}$  solution, and diluted with  $\text{CH}_2\text{Cl}_2$  (2 mL). The layers were separated and the aqueous layer was extracted with  $\text{CH}_2\text{Cl}_2$  ( $2 \times 10$  ml). The combined organic layers were washed with brine, dried over anhydrous  $\text{Na}_2\text{SO}_4$ , and concentrated *in vacuo*. The residue was purified by column chromatography (silica gel, hexanes/EtOAc, 2/1) to afford **18** as a colorless oil (64.4 mg, 93%):  $R_f$  0.26 (hexanes/EtOAc, 1/1);  $[\alpha]^{24.7}_D = +13.9$  ( $c$  0.23,  $\text{CHCl}_3$ );  $^1\text{H}$  NMR (400 MHz,  $\text{CDCl}_3$ )  $\delta$  7.77–7.82 (m, 2 H), 7.64–7.66 (m, 2 H), 6.85 (d,  $J = 8.4$  Hz, 2 H), 6.79 (dd,  $J = 8.8, 1.6$  Hz, 1 H), 6.73–6.76 (m, 2 H), 6.66 (dd,  $J = 8.4, 1.6$  Hz, 2 H), 5.38 (ddd,  $J = 6.8, 6.8, 6.8$  Hz, 2 H), 5.32 (d,  $J = 6.0$  Hz, 2 H), 3.91 (s, 6 H), 3.89 (s, 6 H), 3.81 (s, 6 H), 2.14–2.20 (m, 2 H), 1.68 (d,  $J = 6.8$  Hz, 6 H), 0.59 (d,  $J = 6.0$  Hz, 6 H);  $^{13}\text{C}$  NMR (100 MHz,  $\text{CDCl}_3$ )  $\delta$  198.1, 153.9, 150.0, 149.3, 146.1, 135.9, 127.8, 124.1, 118.8, 116.1, 115.9, 111.6, 110.8, 110.4, 83.7, 78.7, 56.4, 56.3, 44.4, 19.6, 15.1; IR (neat) 2963, 1684, 1594, 1512, 1264, 1022  $\text{cm}^{-1}$ ; HRMS (FAB) found 728.3193 [calcd for  $\text{C}_{42}\text{H}_{48}\text{O}_{11}$  ( $\text{M}$ ) $^+$  728.3197]

### Preparation of Manassantin A (1)

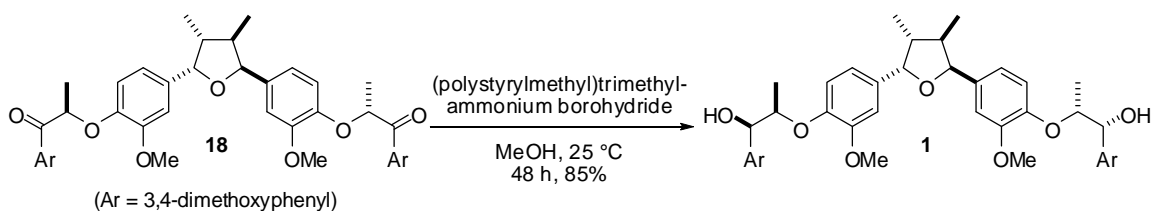

To a solution of bis-ketone **18** (14.0 mg, 0.019 mmol) in MeOH (0.5 mL) was added polymer-supported borohydride (2.5~5.0 mmol  $\text{BH}_4/\text{g}$  resin, 132 mg, 0.33~0.66 mmol). The reaction mixture was stirred with gentle agitation at 25 °C for 48 h. The polymer beads were then removed by filtration and the filtrate was concentrated *in vacuo* to afford a 6:1 diastereomeric mixture of manassantin A and (7*S*,7'''*S*)-epimer, which was then purified by column chromatography (silica gel, hexanes/EtOAc/MeOH, 2/1/0.01) to afford **1** as a white solid (12.0

mg, 85%):  $R_f$  0.18 (hexanes/EtOAc, 2/1);  $[\alpha]^{32.2}_D = -107.9$  ( $c$  0.18,  $\text{CHCl}_3$ )  $^1\text{H}$  NMR (400 MHz,  $\text{CDCl}_3$ )  $\delta$  6.82–7.00 (m, 12 H), 5.46 (d,  $J = 6.0$  Hz, 2 H), 4.64 (d,  $J = 8.4$  Hz, 2 H), 4.08–4.16 (m, 2 H), 3.93 (s, 6 H), 3.89 (s, 6 H), 3.88 (s, 6 H), 2.25–2.33 (m, 2 H), 1.17 (d,  $J = 6.4$  Hz, 6 H), 0.72 (d,  $J = 6.4$  Hz, 6 H);  $^{13}\text{C}$  NMR (100 MHz,  $\text{CDCl}_3$ )  $\delta$  150.5, 149.00, 148.84, 146.5, 136.5, 132.5, 120.0, 118.7, 110.9, 110.0, 84.2, 83.4, 78.4, 55.9, 44.1, 17.1, 14.8; IR (neat) 3594, 2961, 1506, 1262, 1140, 1028  $\text{cm}^{-1}$ ; HRMS (FAB) found 732.3506 [calcd for  $\text{C}_{42}\text{H}_{52}\text{O}_{11}$  ( $\text{M}$ ) $^+$  732.3510]

### Preparation of Mono-Ketone **19**

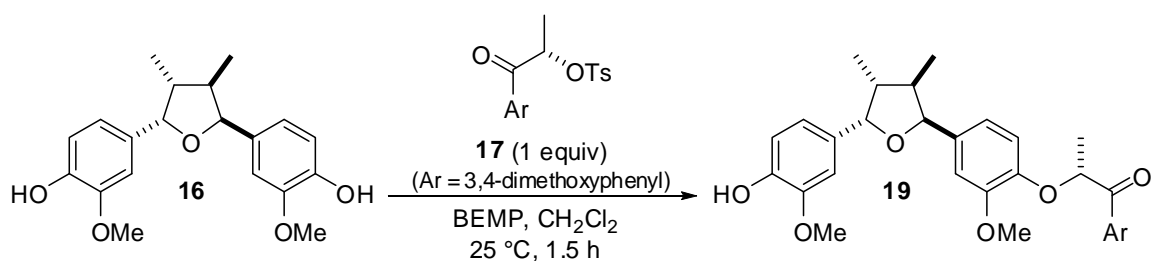

To a cooled (0 °C) solution of **16** (20 mg, 0.058 mmol) in dry  $\text{CH}_2\text{Cl}_2$  (0.5 mL) was added BEMP (16.8  $\mu\text{L}$ , 0.058 mmol). The resulting mixture was stirred at 25 °C for 5 min before tosylate **17** (21 mg, 0.058 mmol) in  $\text{CH}_2\text{Cl}_2$  (1 mL) was added. The reaction mixture was stirred at the same temperature for 1.5 h, quenched with saturated aqueous  $\text{NH}_4\text{Cl}$  solution, and diluted with  $\text{CH}_2\text{Cl}_2$  (2 mL). The layers were separated and the aqueous layer was extracted with  $\text{CH}_2\text{Cl}_2$  (2  $\times$  10 mL). The combined organic layers were washed with brine, dried over anhydrous  $\text{Na}_2\text{SO}_4$ , and concentrated *in vacuo*. The residue was purified via column chromatography, (silica gel, hexanes/EtOAc, 2/1) to afford **19** (9 mg, 29%) in addition to **16** (10 mg, 50%) and **18** (9 mg, 21%):  $[\alpha]^{28.1}_D = -25.1$  ( $c$  0.39,  $\text{CHCl}_3$ );  $^1\text{H}$  NMR (400 MHz,  $\text{CDCl}_3$ )  $\delta$  7.80–7.85 (m, 1 H), 7.67–7.65 (m, 1 H), 6.76–6.94 (m, 7 H), 5.55 (s, 1 H), 5.36–5.44

(m, 3 H), 3.94 (s, 3 H), 3.92 (s, 3 H), 3.88 (s, 3 H), 3.85 (s, 3 H), 2.19–2.26 (m, 2 H), 1.71 (d,  $J = 6.8$  Hz, 3 H), 0.66 (d,  $J = 6.8$  Hz, 3 H), 0.64 (d,  $J = 6.8$  Hz, 3 H);  $^{13}\text{C}$  NMR (100 MHz,  $\text{CDCl}_3$ )  $\delta$  197.7, 153.5, 149.6, 148.9, 146.2, 145.7, 144.4, 135.6, 133.3, 127.4, 123.6, 119.0, 118.4, 115.8, 113.9, 111.2, 110.5, 110.0, 108.8, 83.5, 83.3, 78.3, 56.0, 55.9, 44.0, 19.2, 14.7; IR (neat) 3442, 1682  $\text{cm}^{-1}$ ; HRMS (FAB) found 537.2469 [calcd for  $\text{C}_{31}\text{H}_{37}\text{O}_8$  ( $\text{M}+1$ ) $^+$  537.2488].

### (S)- $\alpha$ -Tosyl Aryl Ketone **20**<sup>2</sup>

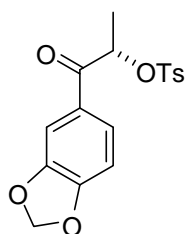

**20**

$[\alpha]_{\text{D}}^{28.3} = -13.0$  ( $c$  0.40,  $\text{CHCl}_3$ );  $R_f$  0.53 (hexanes/EtOAc, 3/1);  $^1\text{H}$  NMR (400 MHz,  $\text{CDCl}_3$ )  $\delta$  7.72 (d,  $J = 8.4$  Hz, 2 H), 7.48 (d,  $J = 8.4$  Hz, 1 H), 7.30 (s, 1 H), 7.24 (d,  $J = 8.8$  Hz, 2 H), 6.80 (d,  $J = 8.0$  Hz, 1 H), 6.01 (s, 2 H), 5.66 (ddd,  $J = 7.2, 7.2, 7.2$  Hz, 1 H), 2.38 (s, 3 H), 1.53 (d,  $J = 7.2$  Hz, 3 H);  $^{13}\text{C}$  NMR (100 MHz,  $\text{CDCl}_3$ )  $\delta$  193.1, 152.8, 148.7, 145.3, 133.8, 130.1, 128.6, 128.3, 125.6, 108.8, 108.4, 102.4, 77.6, 22.0, 19.2; IR (neat) 2977, 1712, 1376, 1121  $\text{cm}^{-1}$ ; HRMS (FAB) found 349.0749 [calcd for  $\text{C}_{17}\text{H}_{17}\text{O}_6\text{S}$  ( $\text{M}+1$ ) $^+$  349.0746].

### Preparation of Bis-Ketone **21**

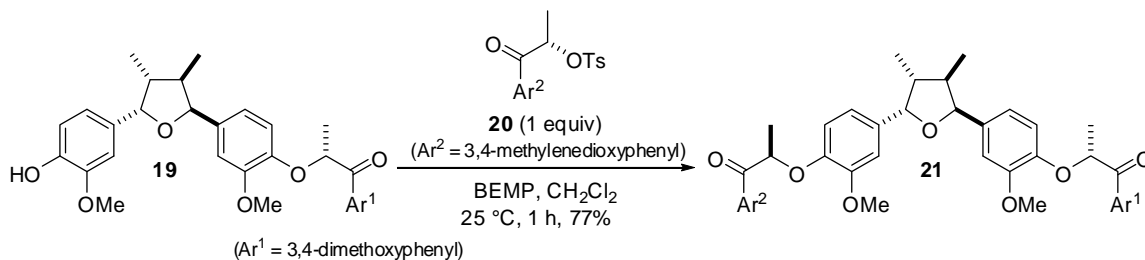

To a cooled (0 °C) solution of **19** (24.3 mg, 0.045 mmol) in  $\text{CH}_2\text{Cl}_2$  (0.5 mL) was added



dropwise BEMP (0.027 mL, 0.094 mmol). The resulting mixture was stirred at the same temperature for 10 min before tosylate **20** (15.7 mg, 0.045 mmol) was added. The reaction mixture was allowed to warm to 25 °C for 1 h with stirring, quenched with saturated aqueous NH<sub>4</sub>Cl, and diluted with CH<sub>2</sub>Cl<sub>2</sub>. The layers were separated and the aqueous layer was extracted with CH<sub>2</sub>Cl<sub>2</sub> (2 × 5 mL). The combined organic layers were washed with brine, dried over anhydrous Na<sub>2</sub>SO<sub>4</sub>, and concentrated *in vacuo*. The residue was purified by column chromatography, (silica gel, hexanes/EtOAc, 2/1) to afford **21** as a colorless oil (24.8 mg, 77%): R<sub>f</sub> 0.42 (hexanes/EtOAc, 1/1); [α]<sup>28.2</sup><sub>D</sub> = -10.4 (c 0.41, CHCl<sub>3</sub>); <sup>1</sup>H NMR (400 MHz, CDCl<sub>3</sub>) δ 7.74–7.82 (m, 2 H), 7.65 (dd, *J* = 3.6, 2.0 Hz, 1 H), 7.58 (dd, *J* = 4.8, 2.0 Hz, 1 H), 6.72–6.88 (m, 6 H), 6.671 (d, *J* = 8.4 Hz, 1 H), 6.666 (d, *J* = 8 Hz, 1 H), 6.01 (s, 2 H), 5.32–5.41 (m, 4 H), 3.92 (s, 3 H), 3.90 (s, 3 H), 3.82 (s, 6 H), 2.12–2.22 (m, 2 H), 1.69 (d, *J* = 6.4 Hz, 3 H), 1.65 (d, *J* = 6.8 Hz, 3 H), 0.60 (d, *J* = 6.0 Hz, 6 H); <sup>13</sup>C NMR (100 MHz, CDCl<sub>3</sub>) δ 198.1, 197.6, 153.9, 152.3, 150.1, 150.0, 149.3, 148.4, 146.1, 146.0, 136.1, 135.9, 129.4, 127.8, 125.7, 124.0, 118.8, 116.5, 116.1, 111.6, 110.8, 110.4, 109.2, 108.3, 102.2, 83.7, 78.77, 78.66, 56.40, 56.27, 44.4, 19.53, 19.36, 15.1; IR (neat) 2963, 1684, 1511, 1261, 1036 cm<sup>-1</sup>; HRMS (FAB) found 713.2957 [calcd for C<sub>41</sub>H<sub>45</sub>O<sub>11</sub> (M+1)<sup>+</sup> 713.2962].

### Preparation of Manassantin B (**2**)

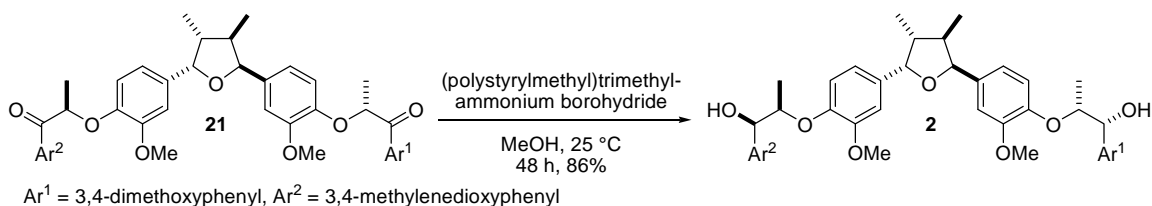

To a stirred solution of **21** (24.8 mg, 0.035 mmol) in MeOH (1.5 mL) was added polymer-supported borohydride (2.5~5.0 mmol BH<sub>4</sub>/g resin, 400 mg, 1.0~2.0 mmol) and the reaction

mixture was stirred with gentle agitation at 25 °C for 48 h. The polymer beads were then removed by filtration and the filtrate was concentrated *in vacuo* to afford a 5.4:1 diastereomeric mixture (21.4 mg, 86%) of manassantin B (**2**) and (7*S*,7''*S*)-epimer, which was then purified by column chromatography (silica gel, hexanes/EtOAc/MeOH, 2/1/0.01) to afford manassantin B (**2**) as a white solid (13.3 mg, 53%) and a mixture (8.1 mg, 33%) of **2** and (7*S*,7''*S*)-epimer: R<sub>f</sub> 0.32 (hexanes/EtOAc/MeOH, 2/1/0.01); [α]<sup>29.5</sup><sub>D</sub> = -108.4 (*c* 0.22, CHCl<sub>3</sub>); <sup>1</sup>H NMR (400 MHz, CDCl<sub>3</sub>) δ 6.74–7.01 (m, 12 H), 5.93 (s, 2 H), 5.45 (d, *J* = 6 Hz, 2 H), 4.65 (d, *J* = 8.0 Hz, 1 H), 4.62 (d, *J* = 8.8 Hz, 1 H), 4.04–4.16 (m, 4 H), 3.93 (s, 3H), 3.92 (s, 3 H), 3.89 (s, 3 H), 3.88 (s, 3 H), 2.23–2.32 (m, 2 H), 1.12–1.18 (dd, *J* = 5.6, 5.6 Hz, 6 H), 0.72 (d, *J* = 5.2, 6 H); <sup>13</sup>C NMR (100 MHz, CDCl<sub>3</sub>) δ 151.0, 150.8, 149.4, 149.2, 148.1, 147.8, 146.8, 137.0, 136.90, 134.4, 132.9, 121.5, 120.4, 119.3, 119.1, 111.2, 110.5, 110.4, 108.5, 107.9, 101.4, 84.6, 84.5, 83.8, 78.8, 56.3, 44.6, 17.5, 17.3, 15.3; IR (neat) 3725, 2959, 1508, 1259, 1035 cm<sup>-1</sup>; HRMS (FAB) found 716.3196 [calcd for C<sub>41</sub>H<sub>48</sub>O<sub>11</sub> (M)<sup>+</sup> 716.3197].

## Reference

1. Kim, H.; Wooten, C. M.; Park, Y.; Hong, J. *Org. Lett.* **2007**, *9*, 3965–3968.
2. Lee, A.-L.; Ley, S. V. *Org. Biomol. Chem.* **2003**, *1*, 3957–3966.

### **Determination of HIF-1 Inhibition Using the Luciferase Imaging**

4T1-ODD-Luc cells (a gift from Dr. Chuan-Yuan Li), stably transfected with the oxygen-dependent-degradation (ODD) domain of HIF-1 $\alpha$  and a firefly luciferase reporter, were seeded in the 24-well plate at a density of  $10^5$  cells/well. After 16-hour incubation, cells were treated with 240  $\mu$ M of Cobalt (II) Chloride (Sigma-Aldrich, St. Louis, MO, USA) and serially diluted compounds for 24 h. To measure the luciferase signals, luciferin (150 mg/mL) was added and the plates were imaged using the Xenogen IVIS imaging system and associated Living Image software (Xenogen, Alameda, CA). Luciferase expression/activity was detected and quantified as relative light units (RLUs). Results are means  $\pm$  SD, n = 3.

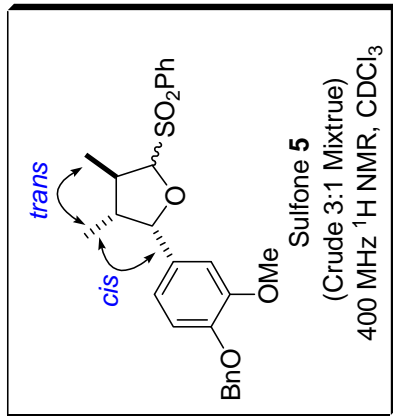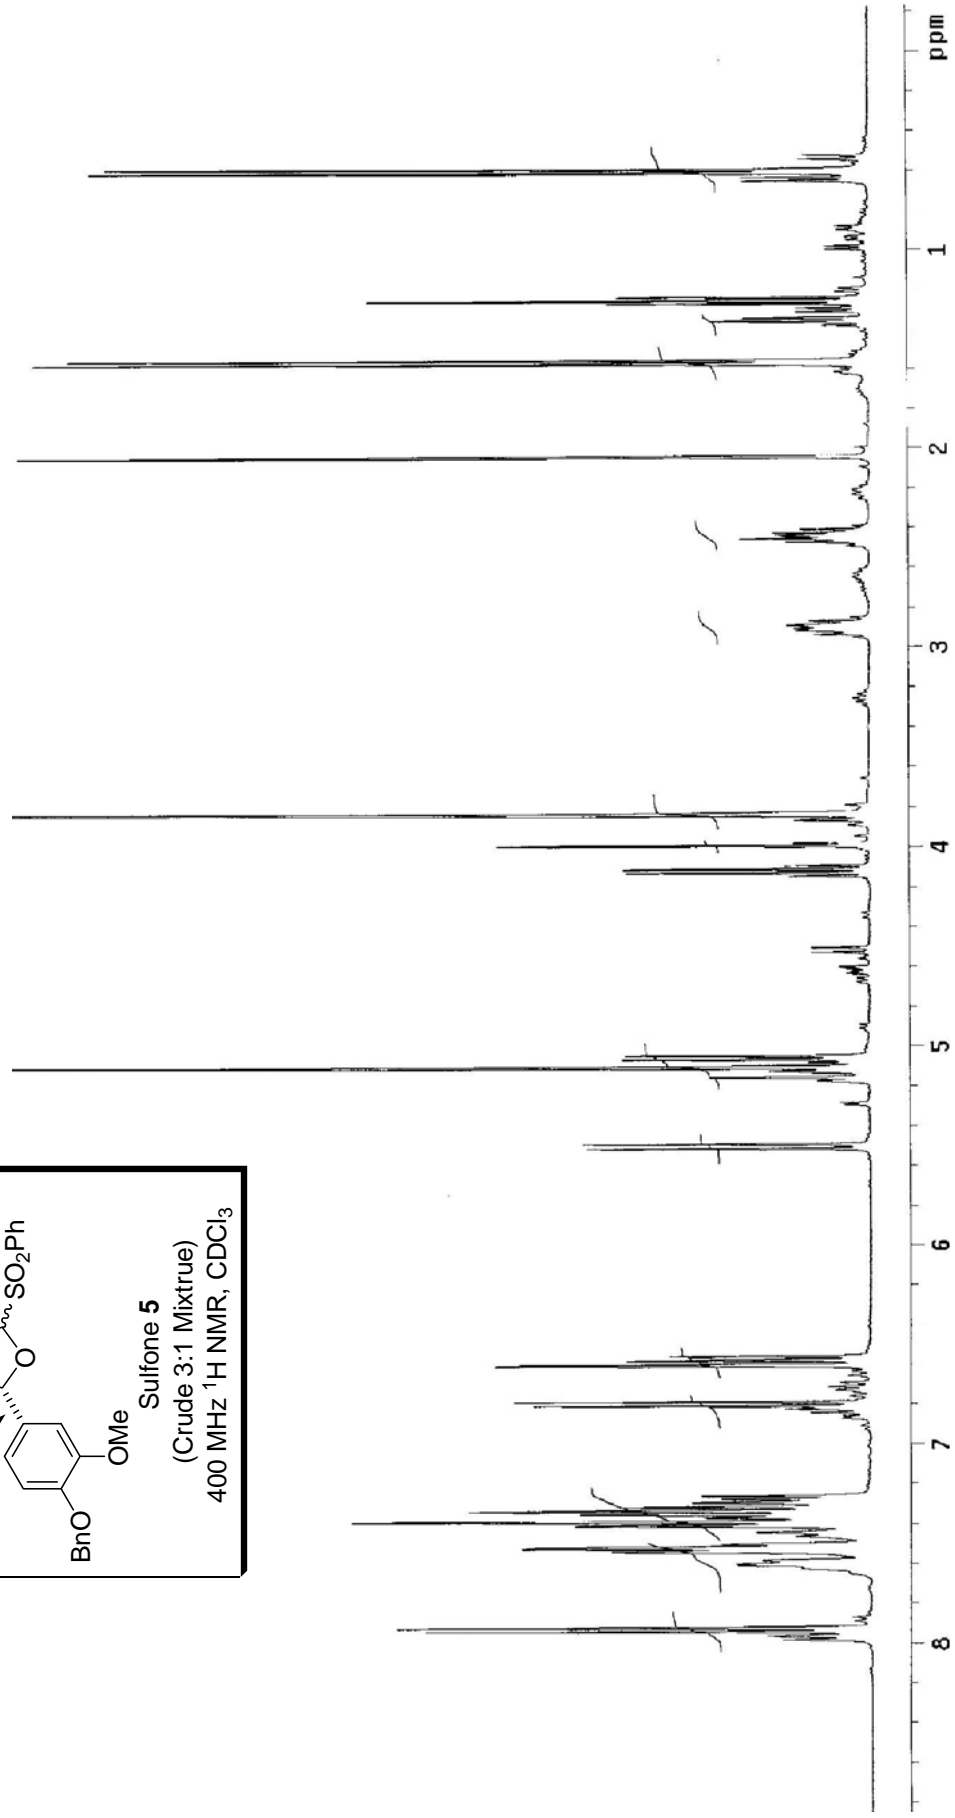

S20

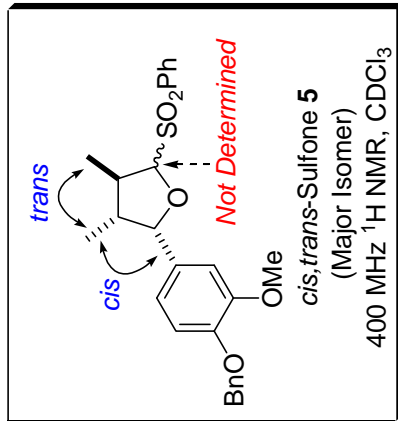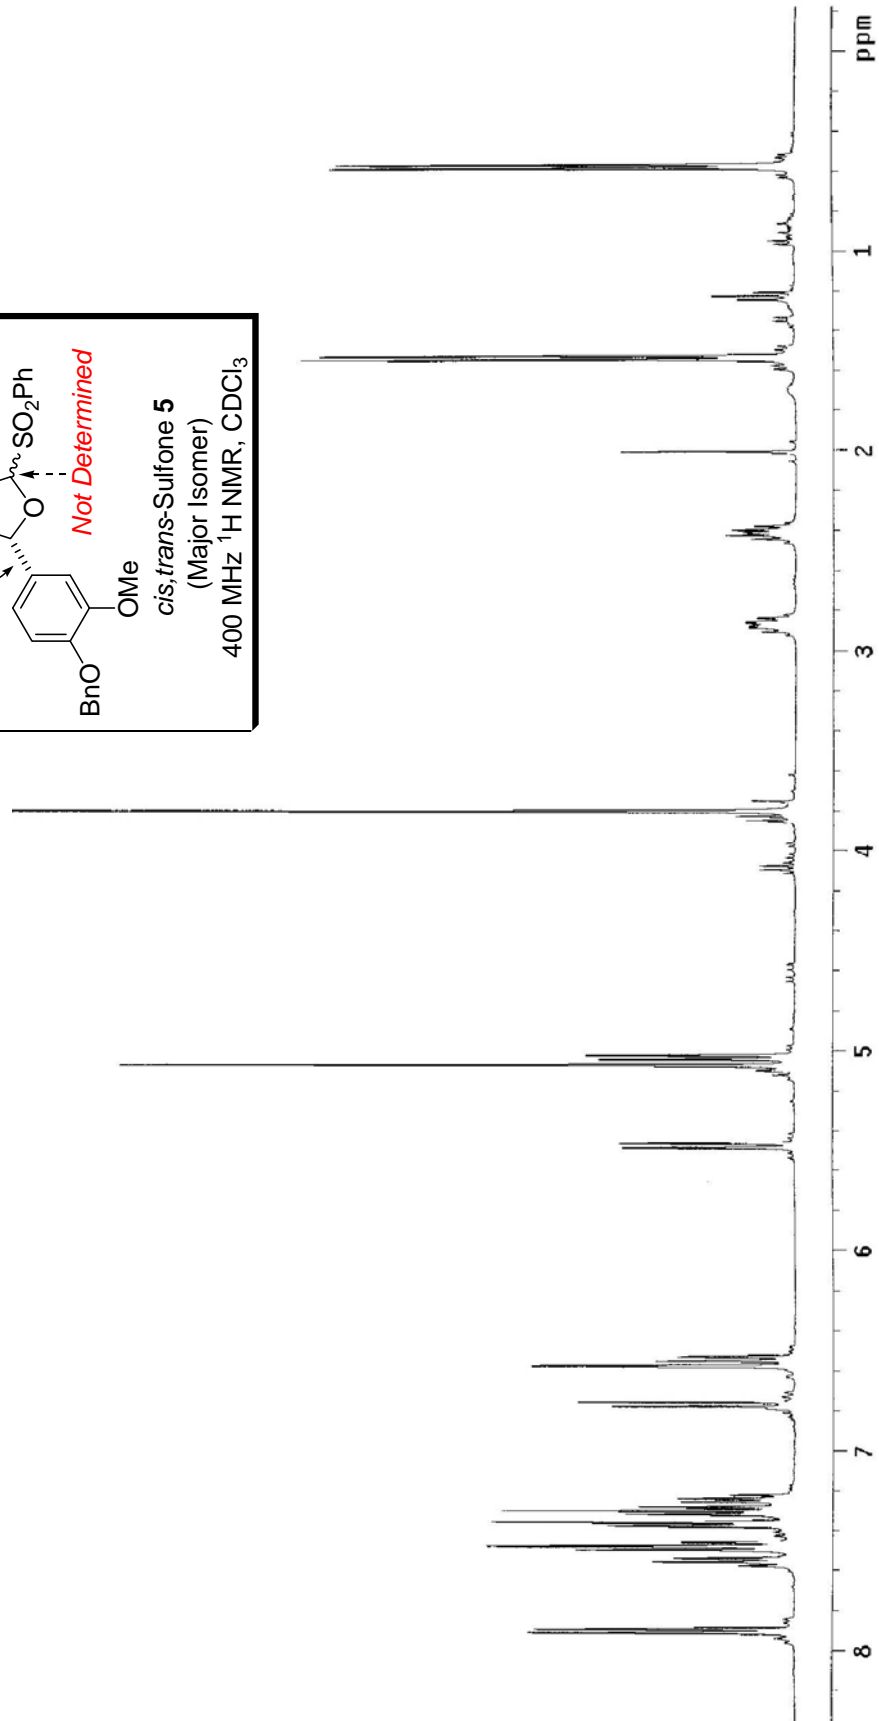

S21

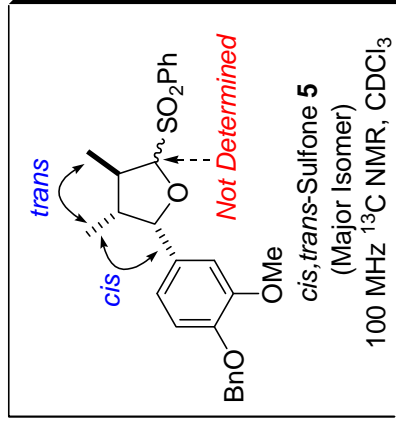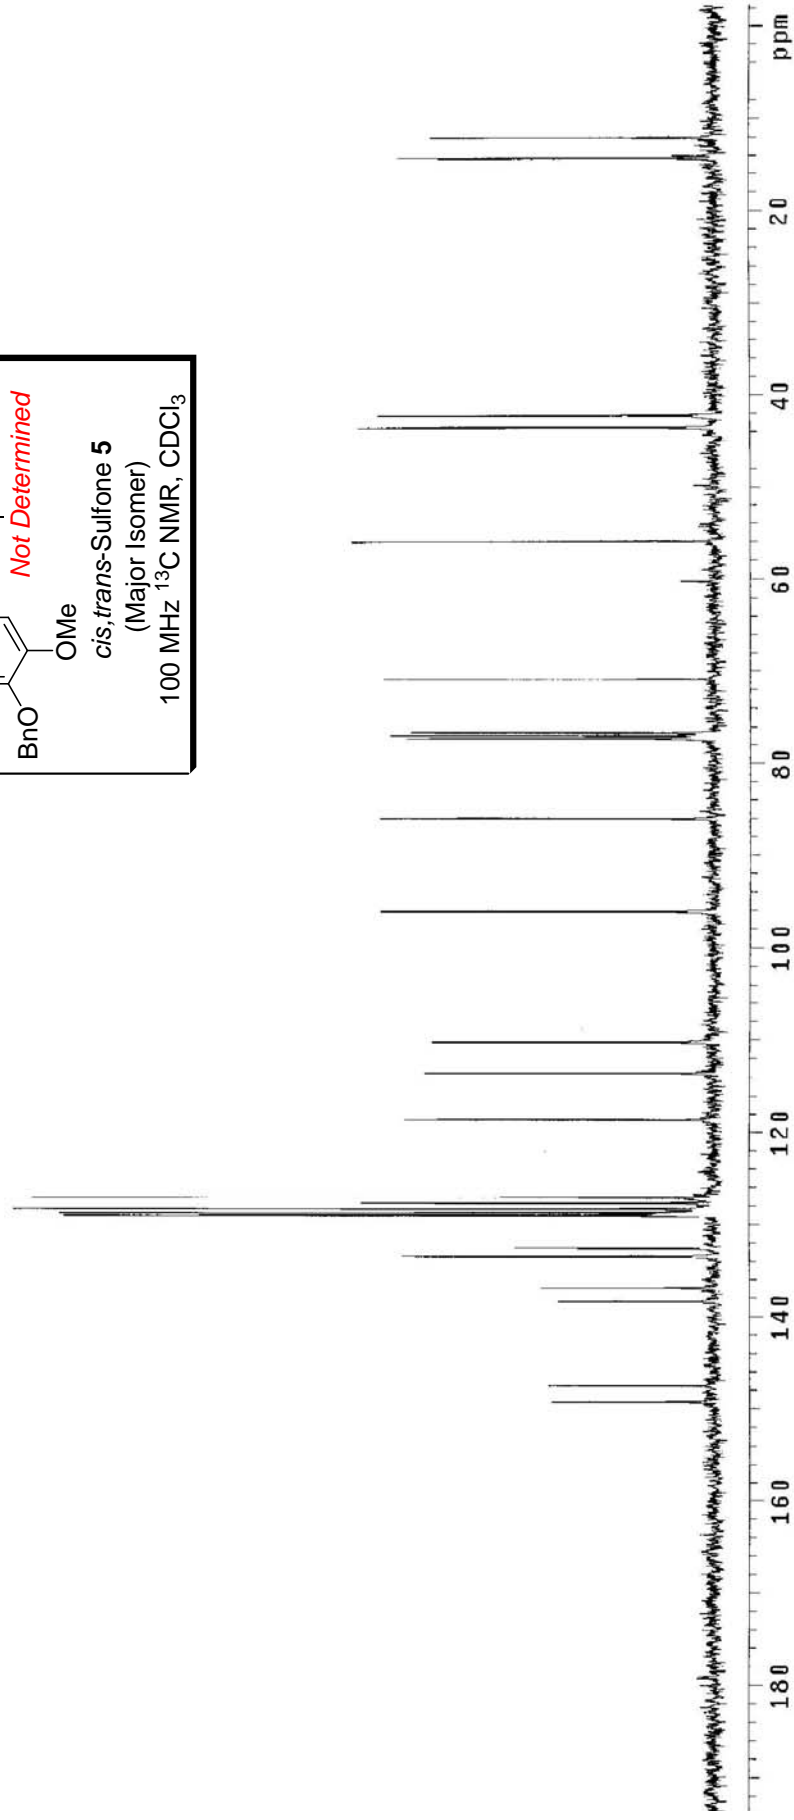

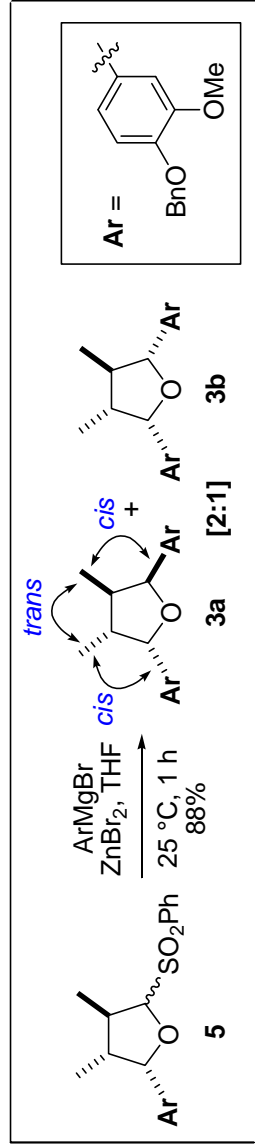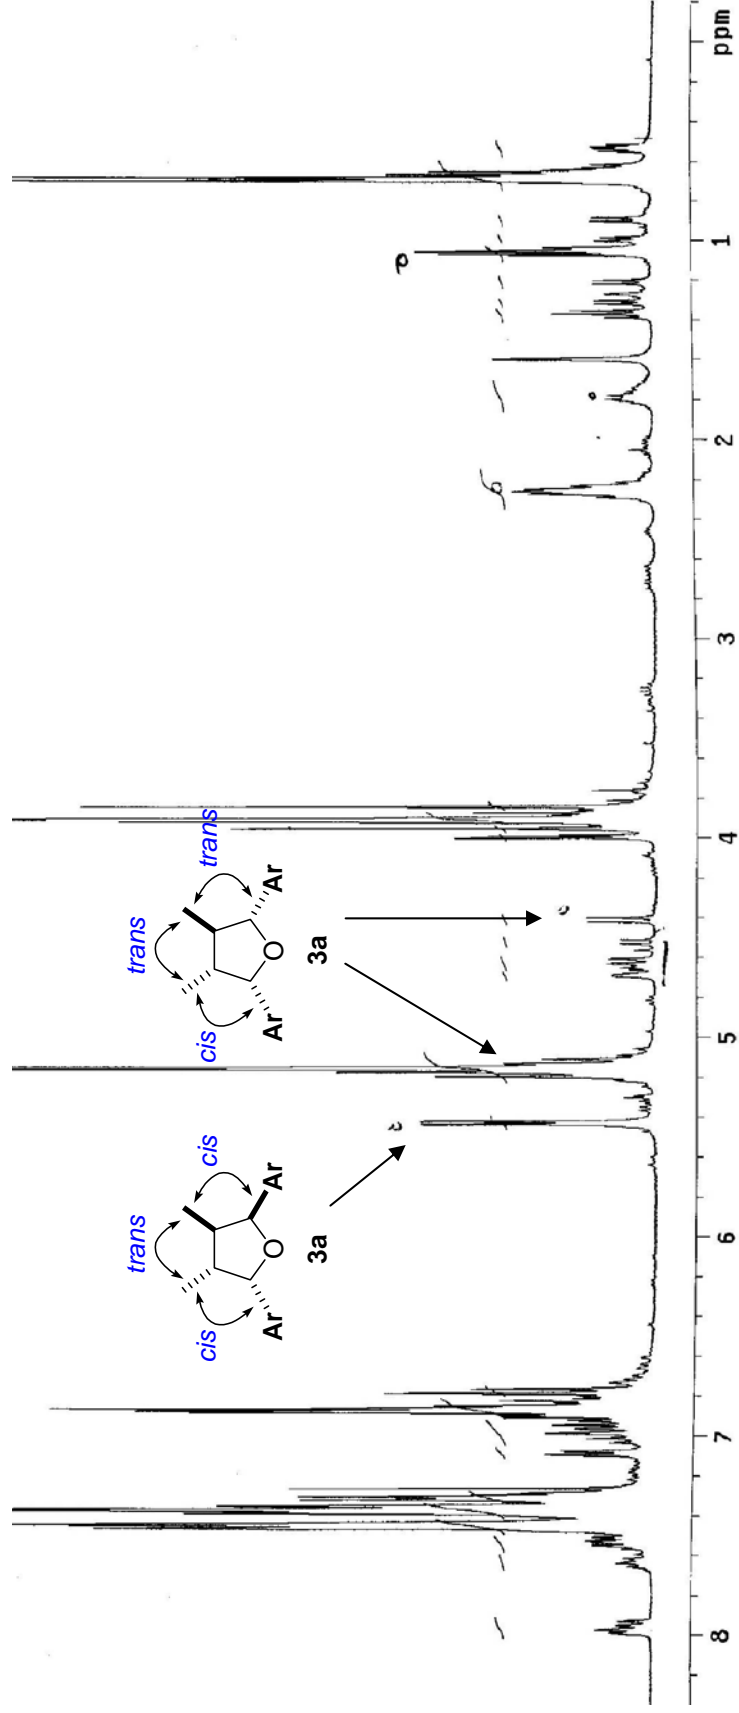

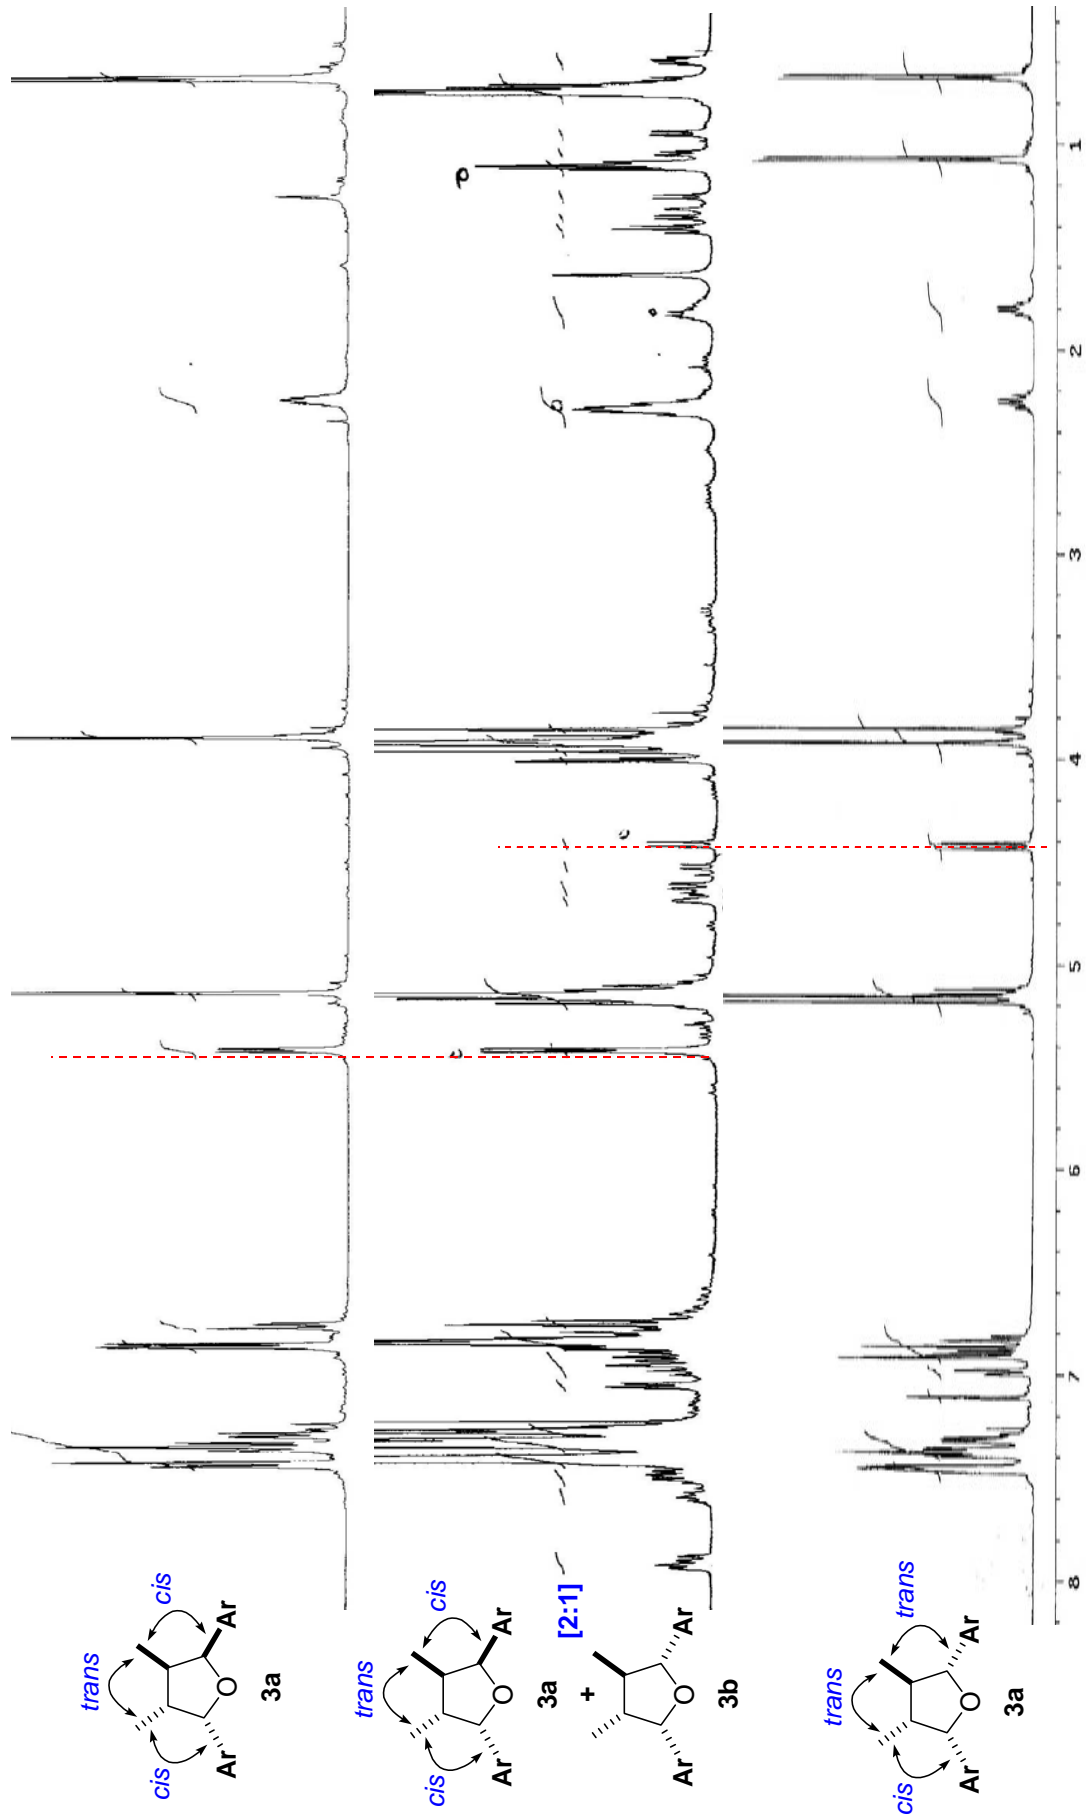



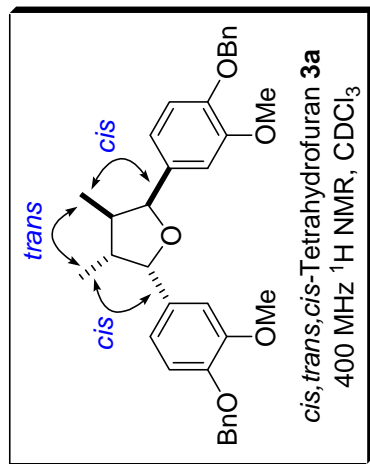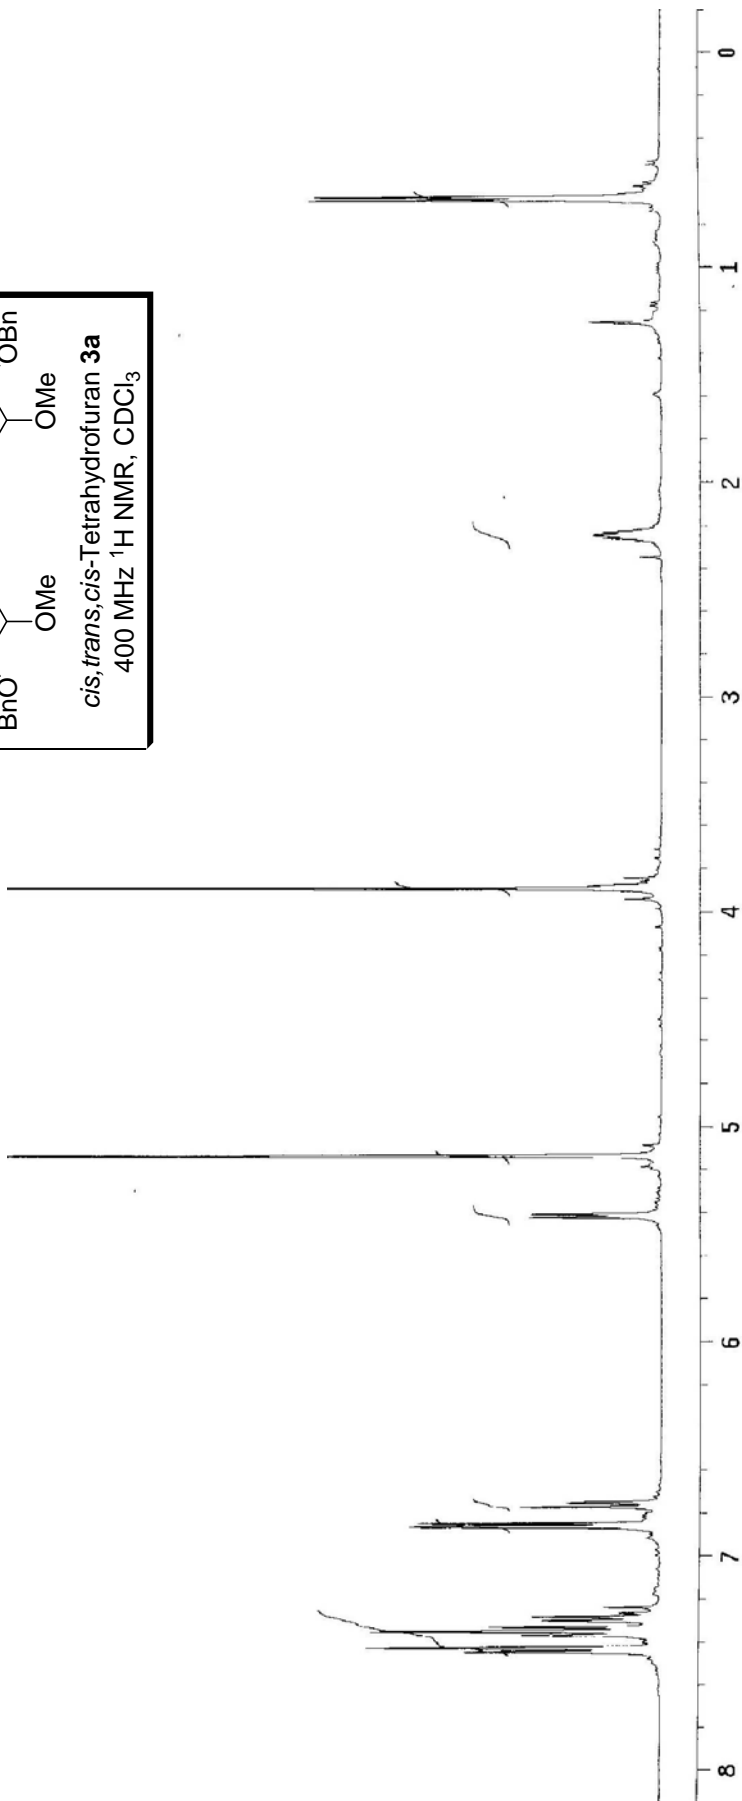

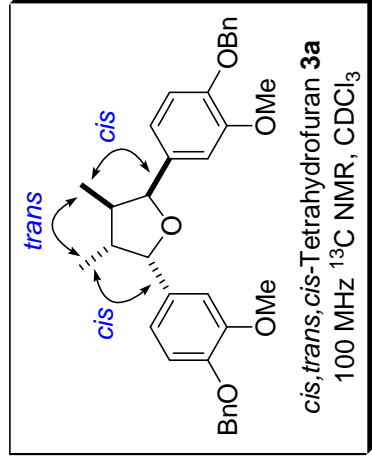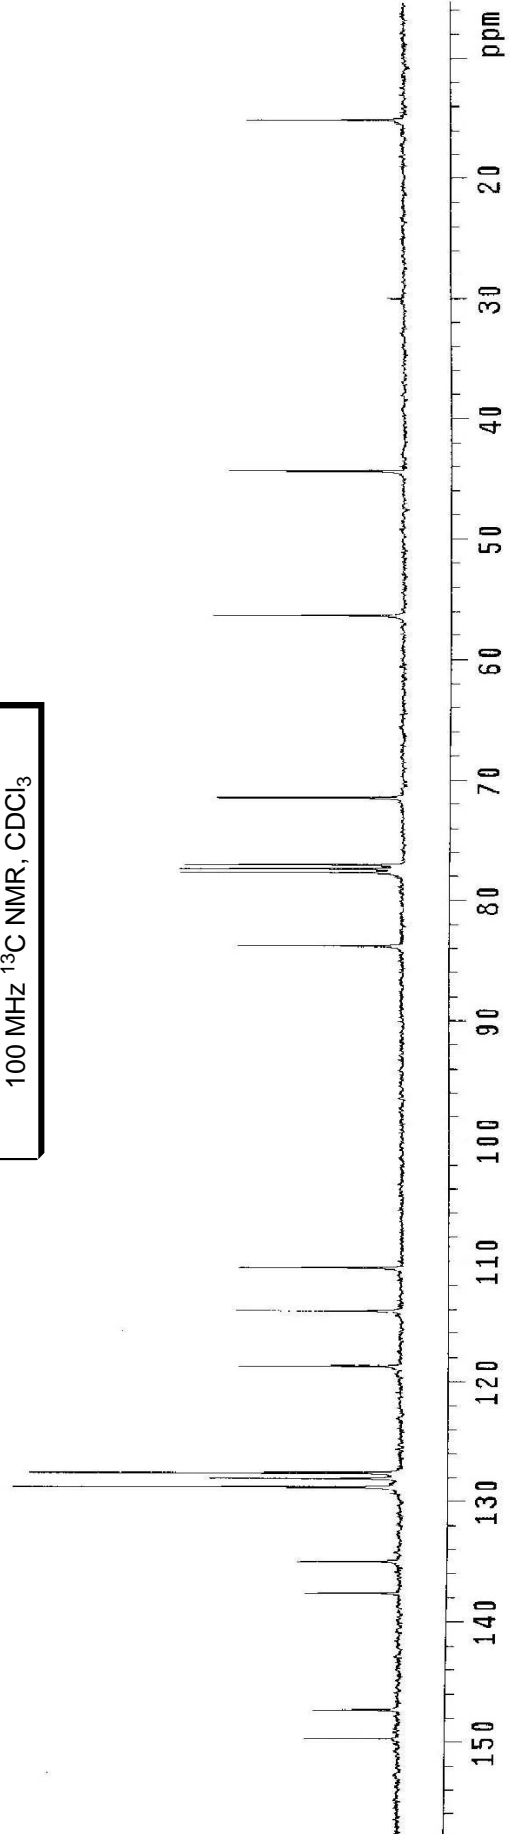

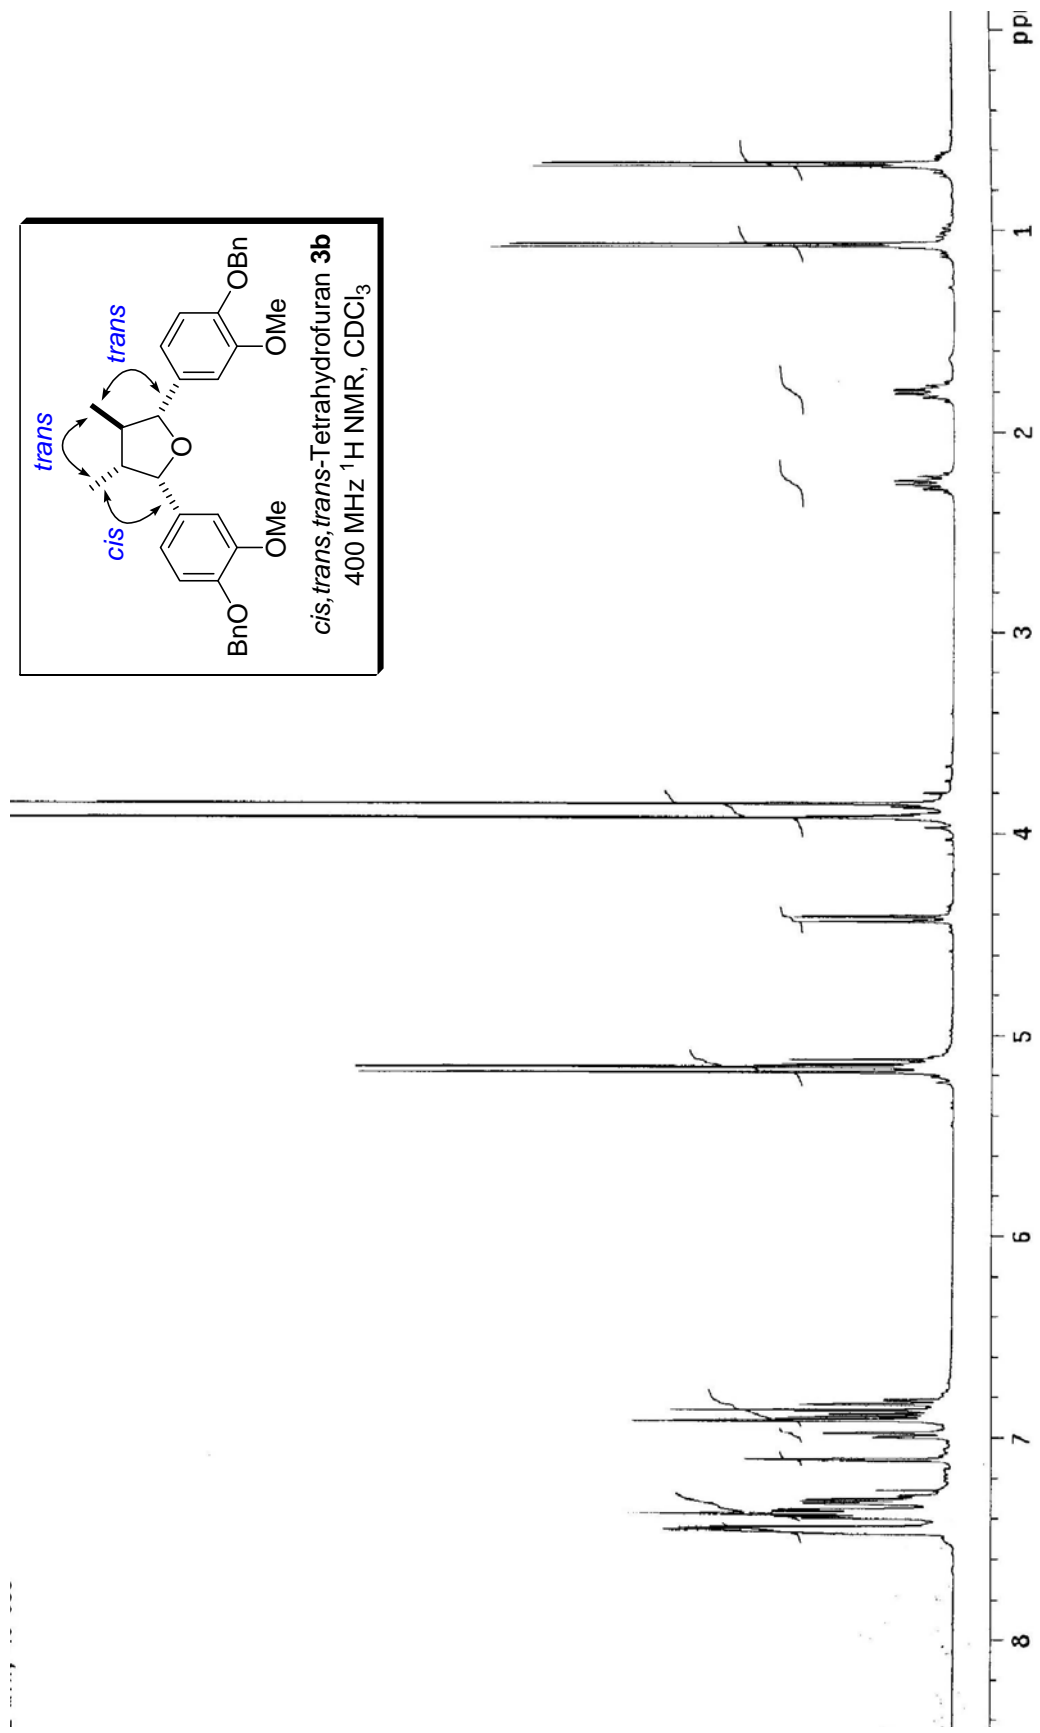

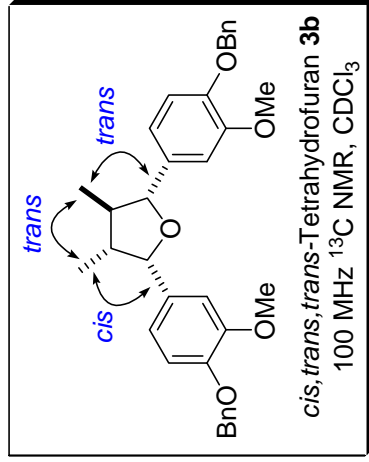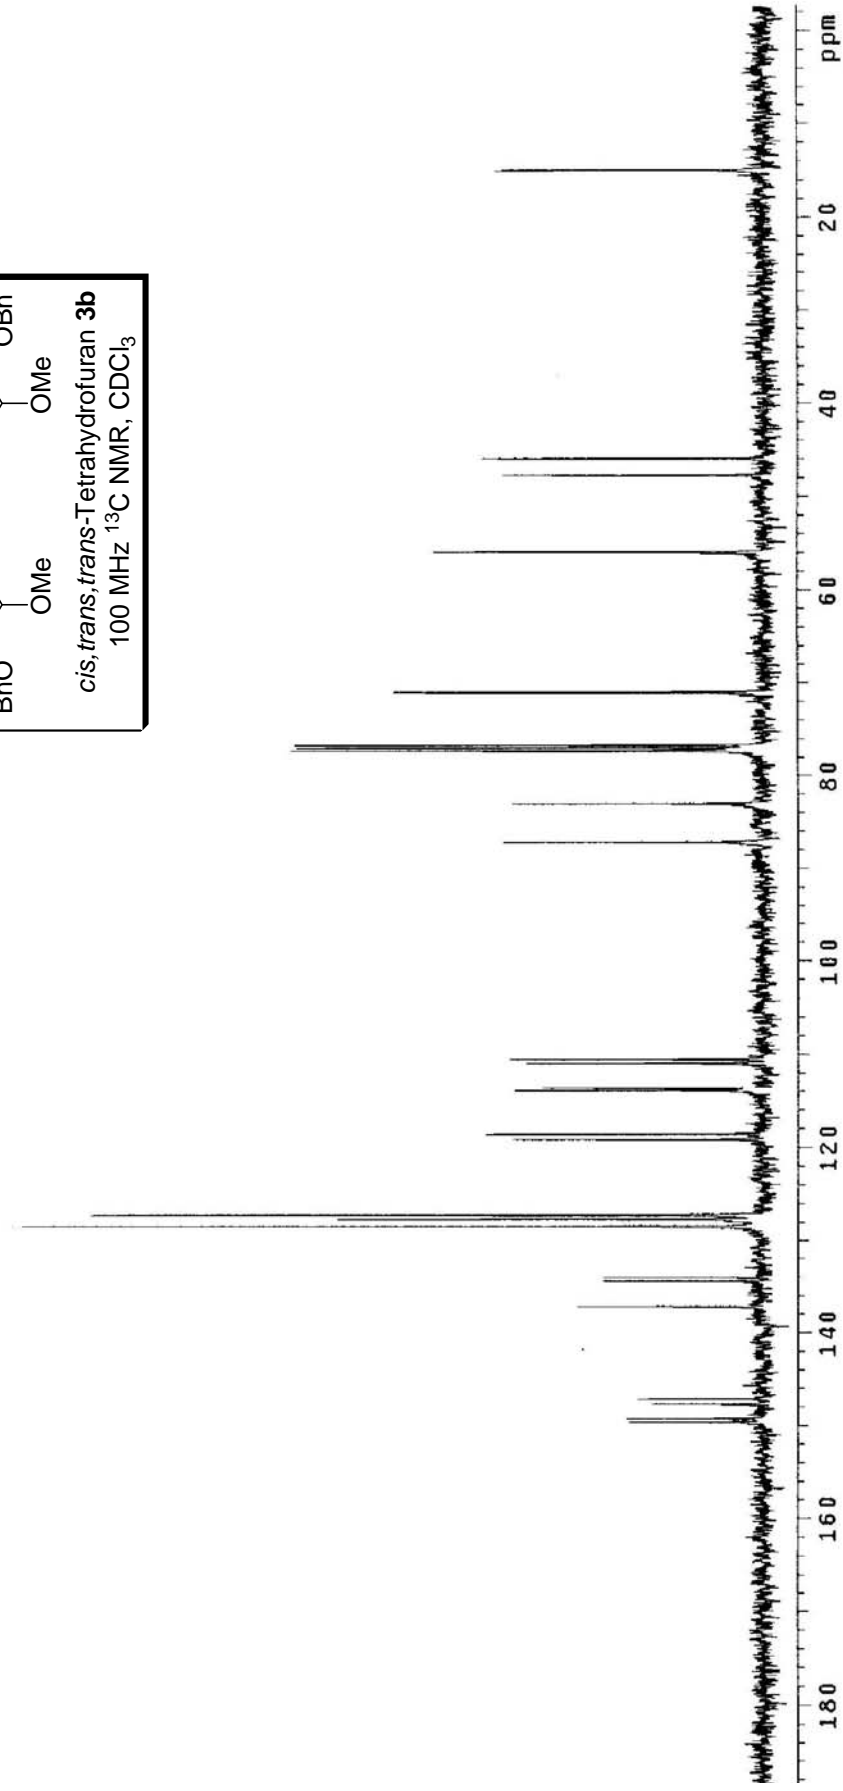

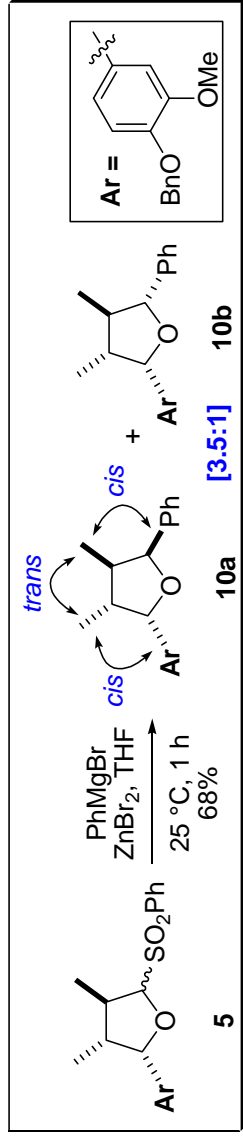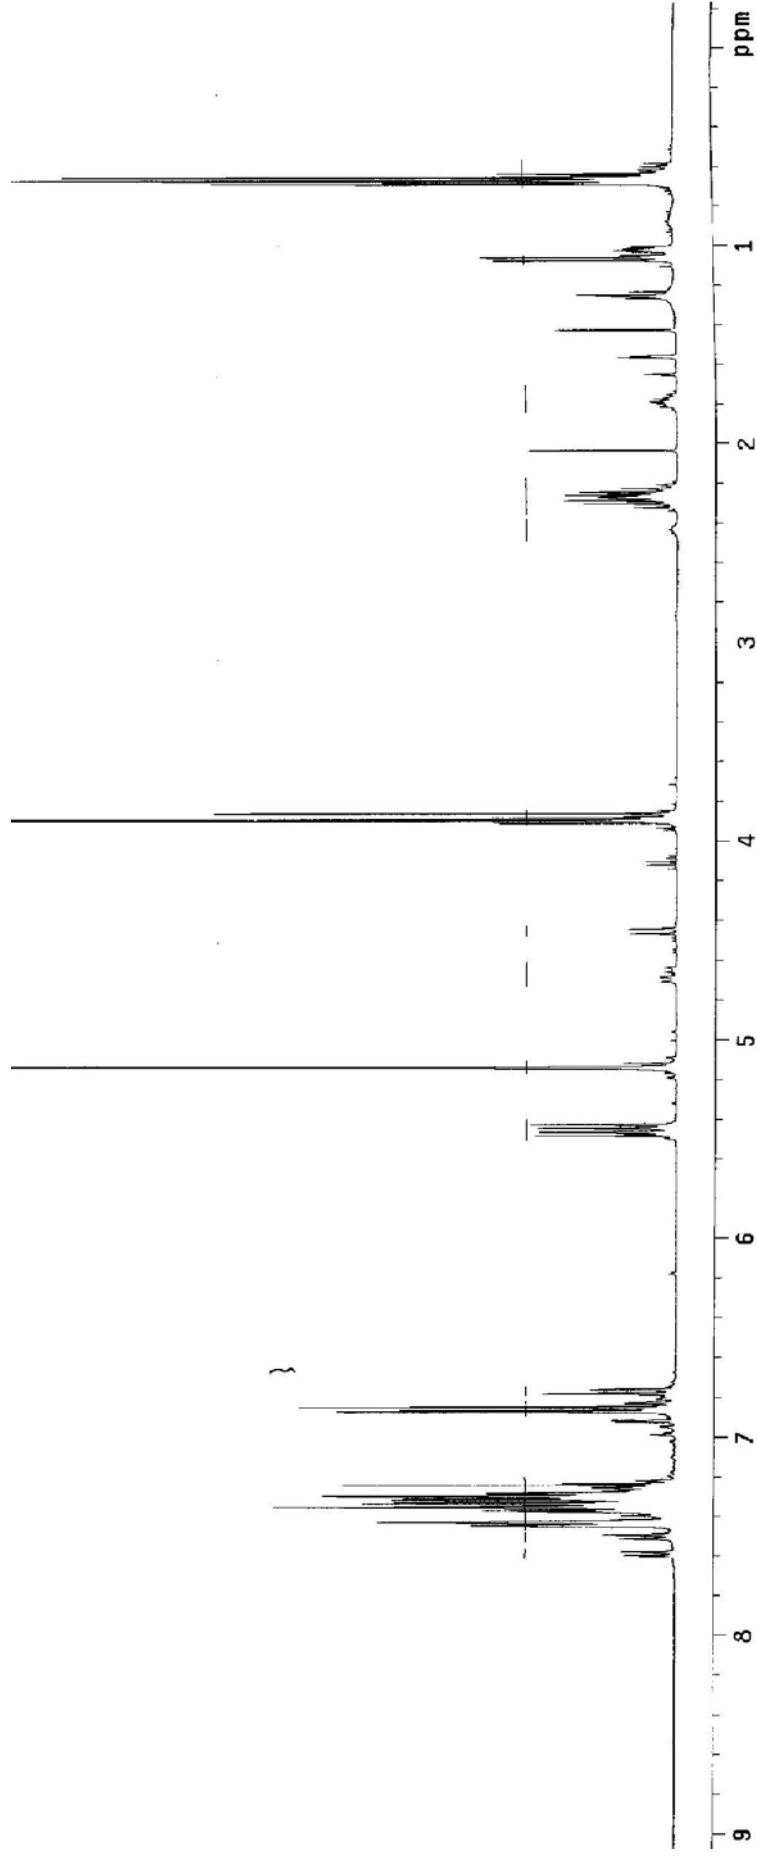

S29

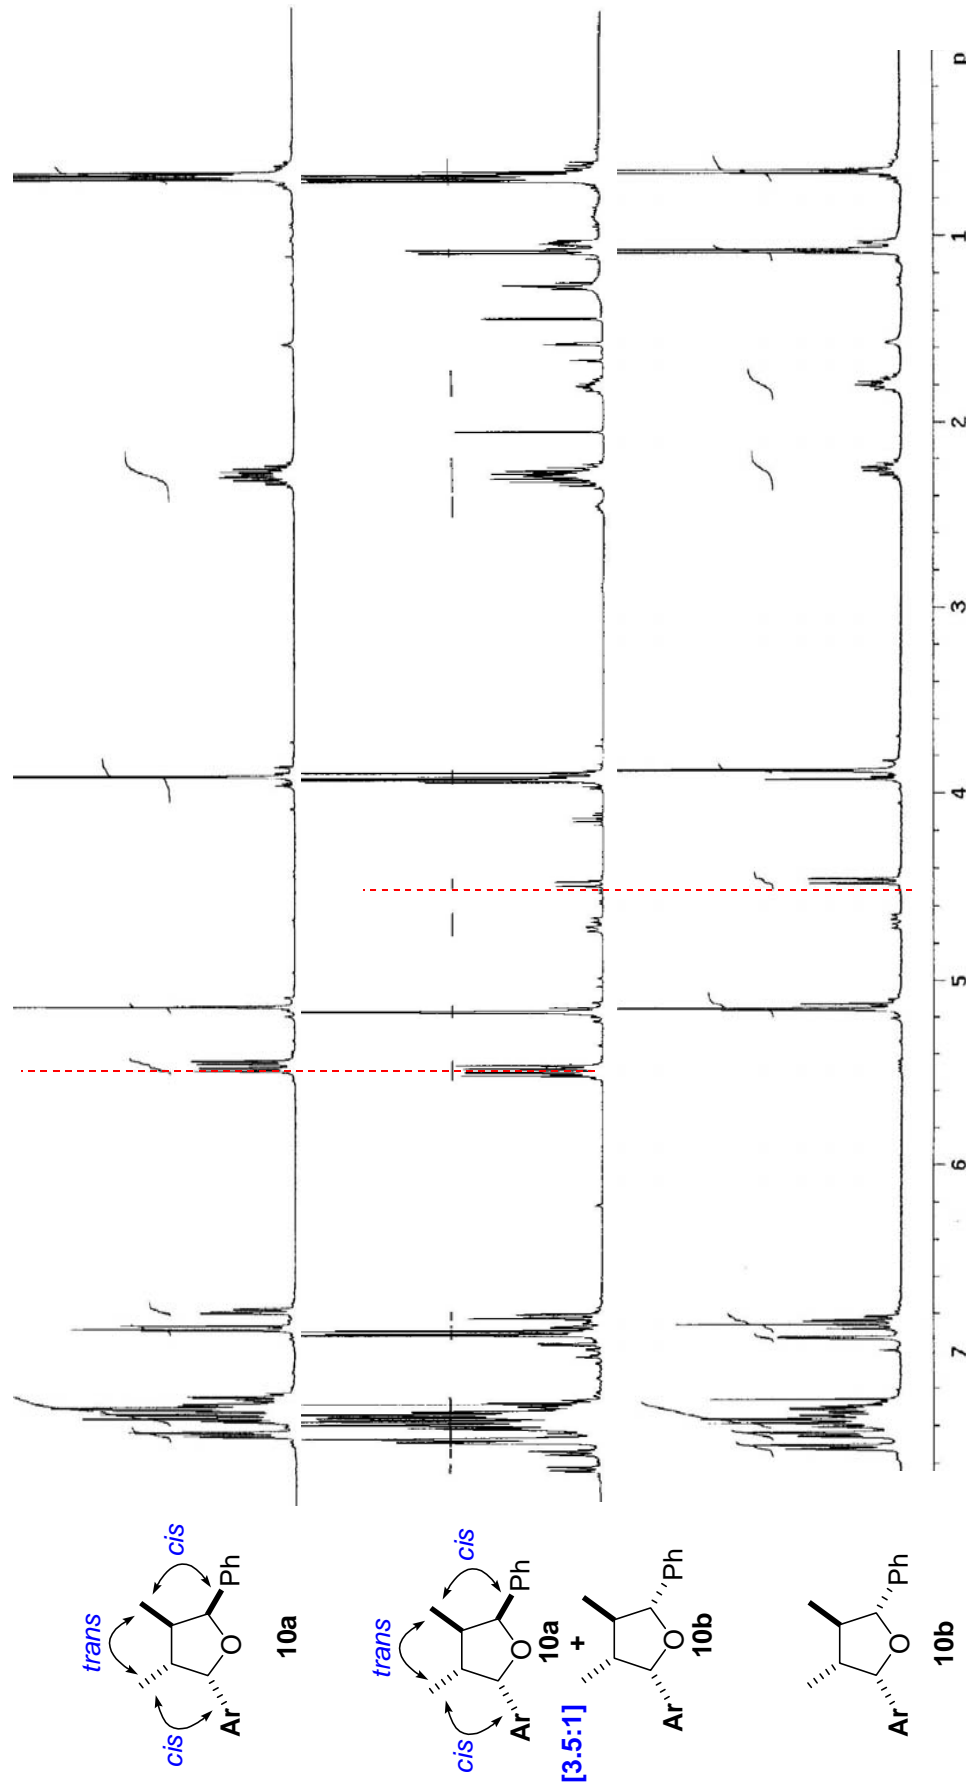

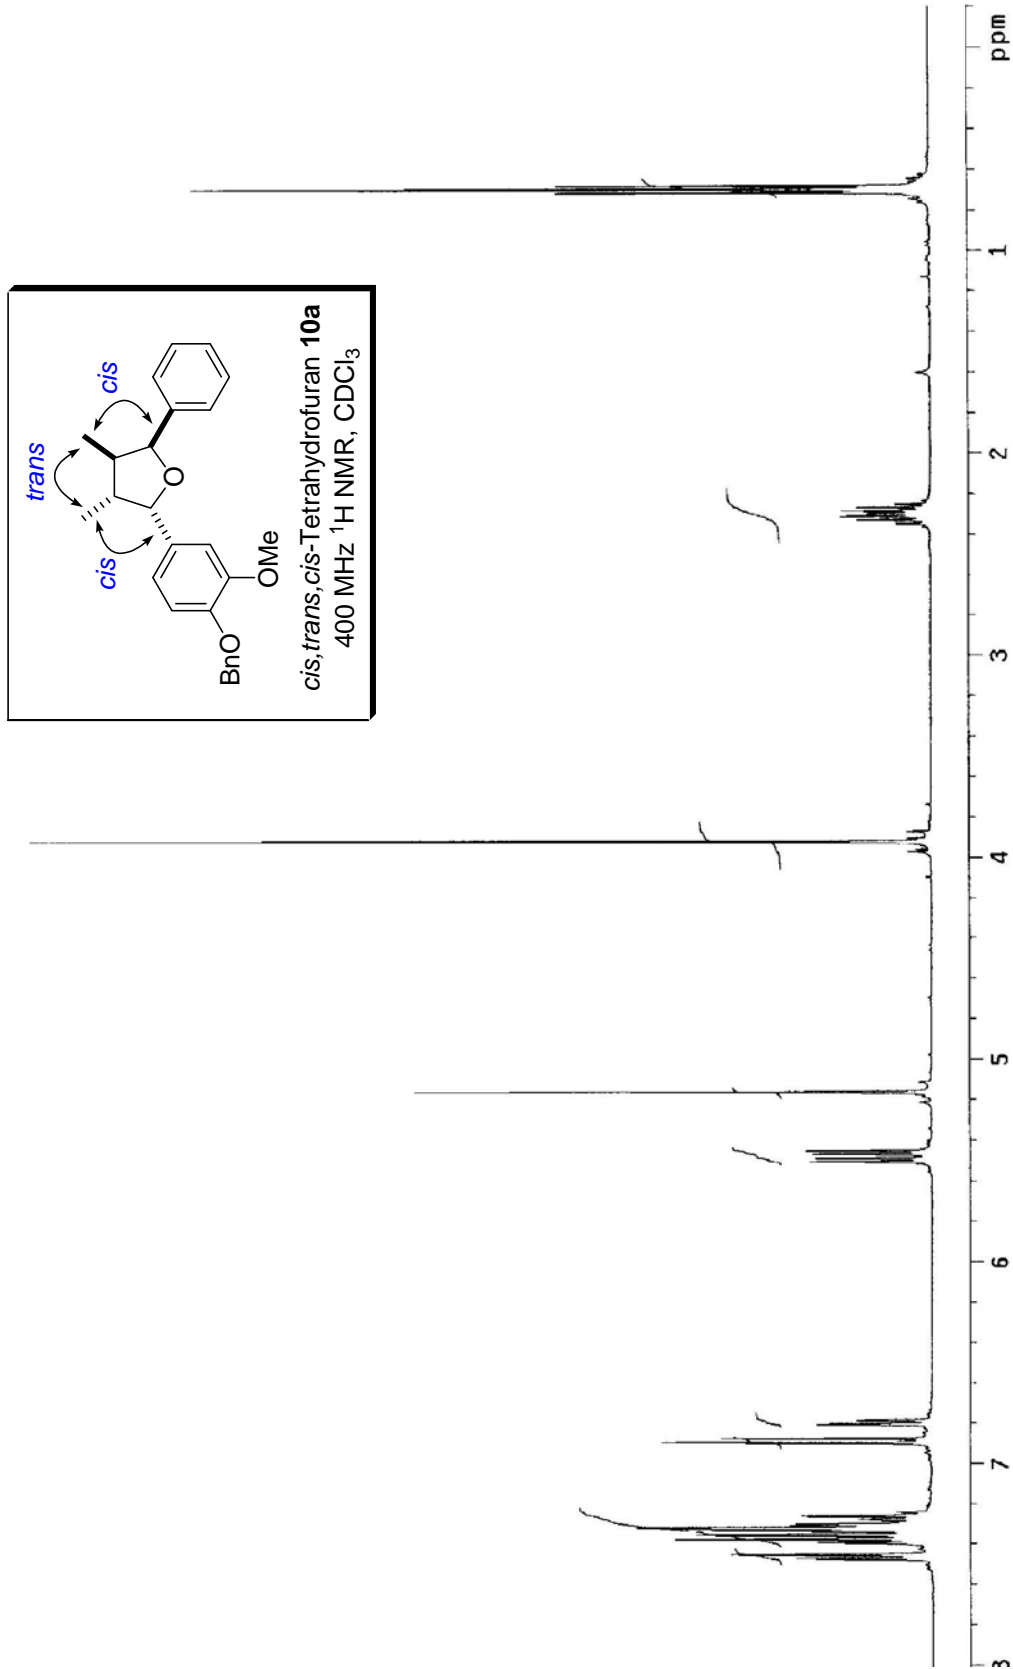

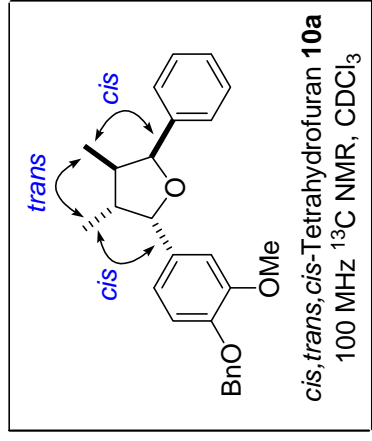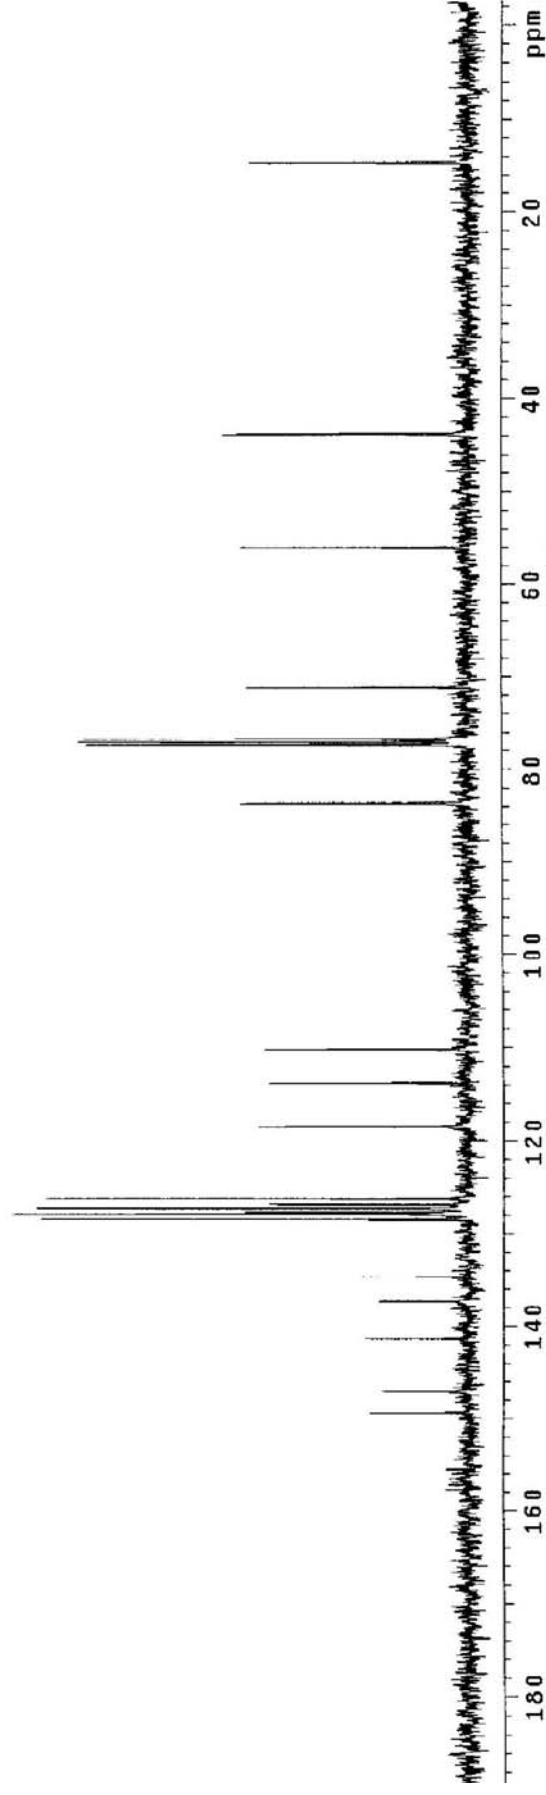



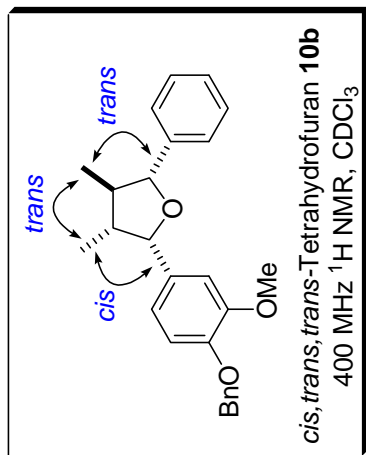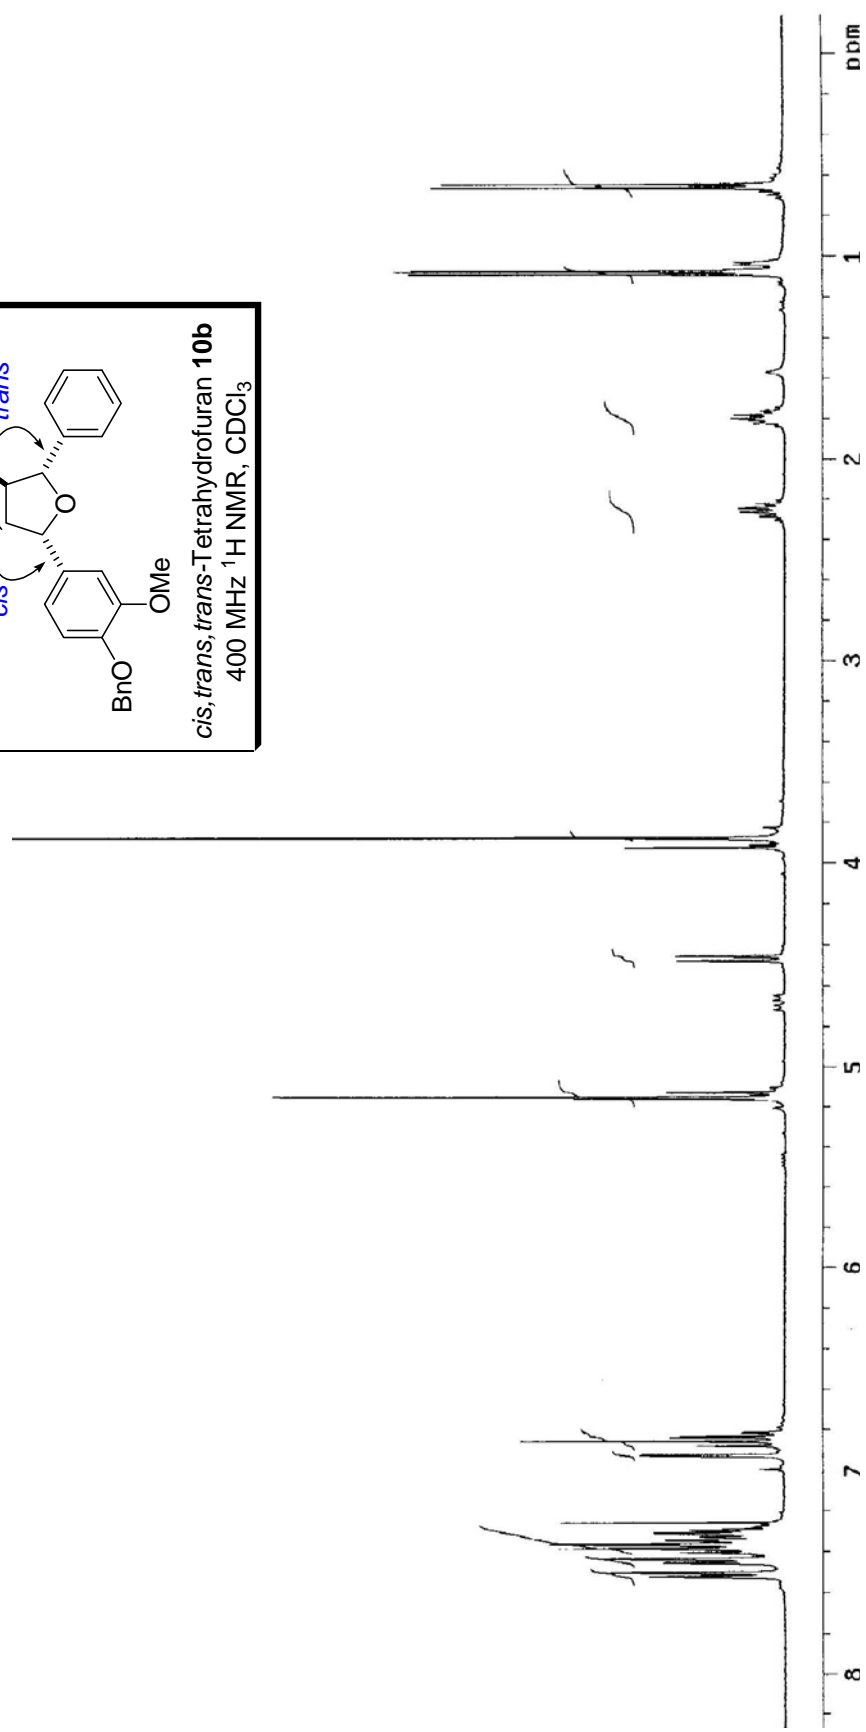

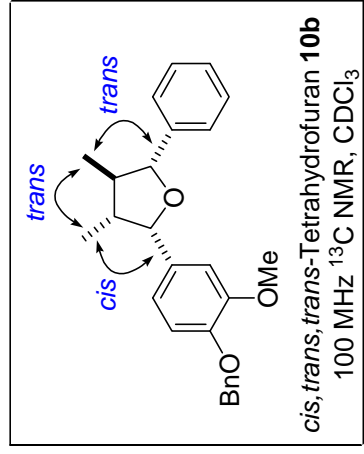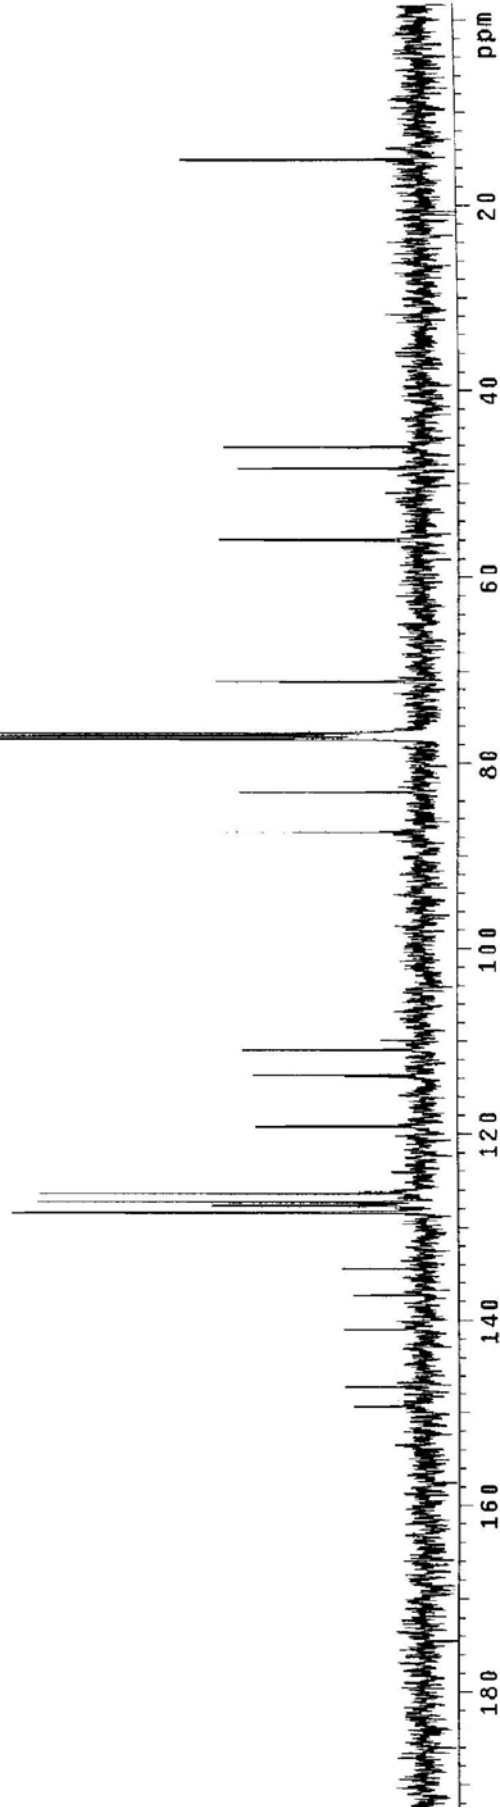

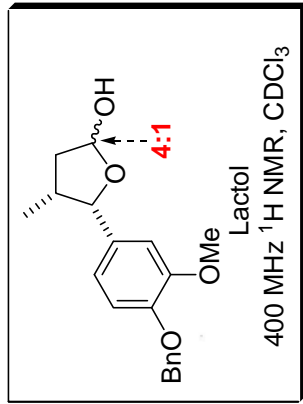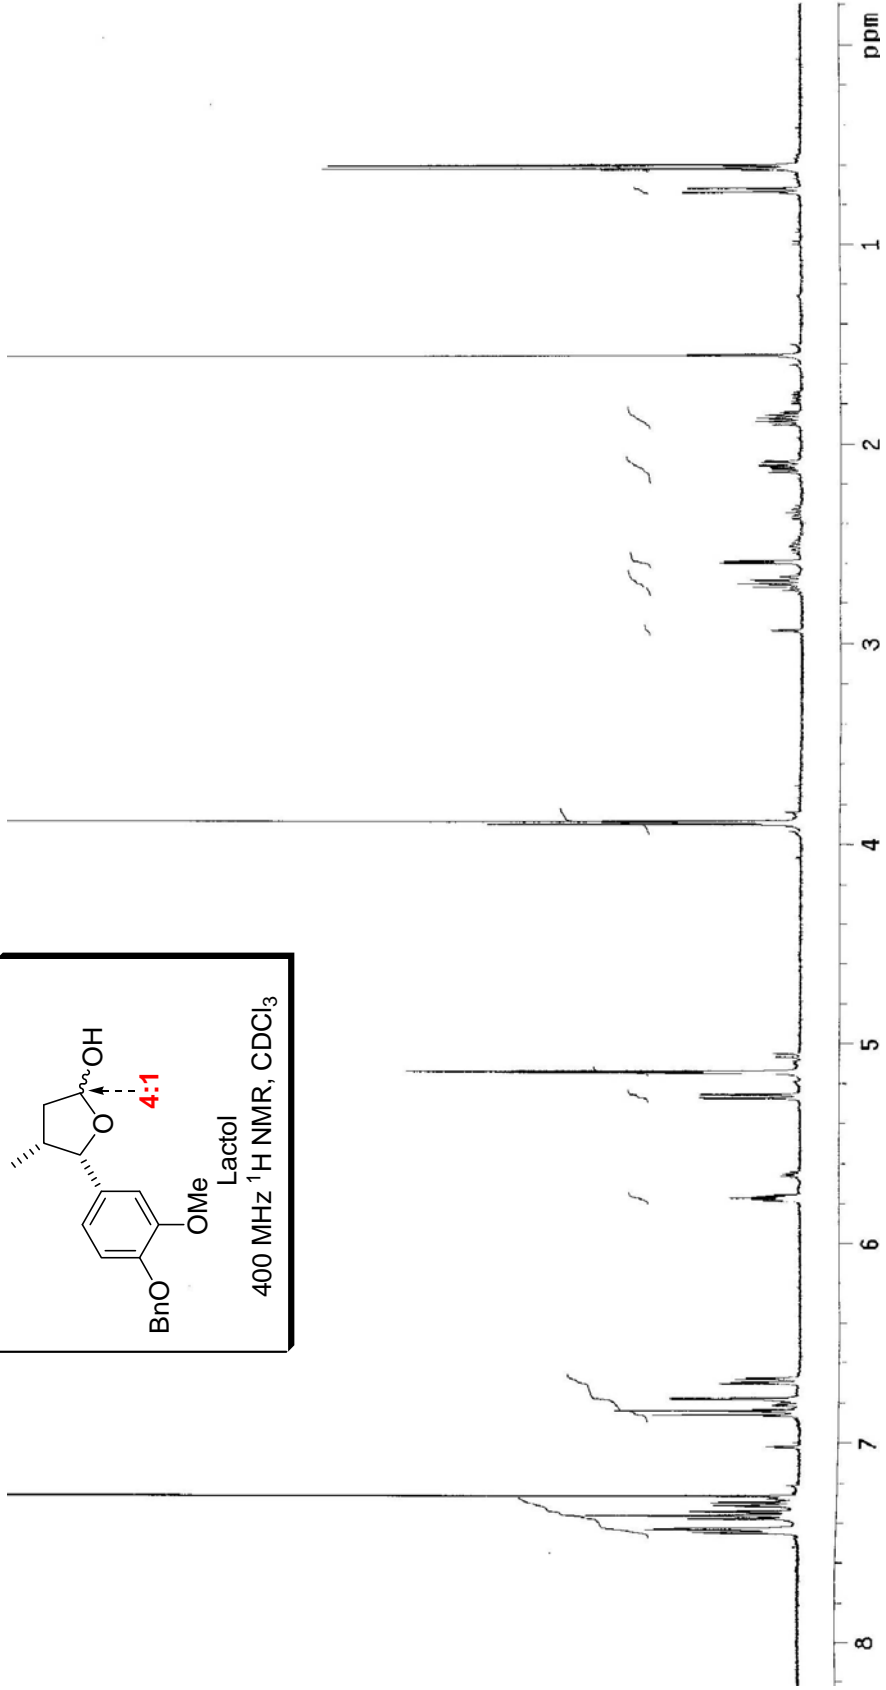

S35

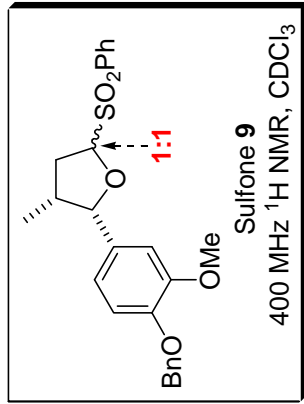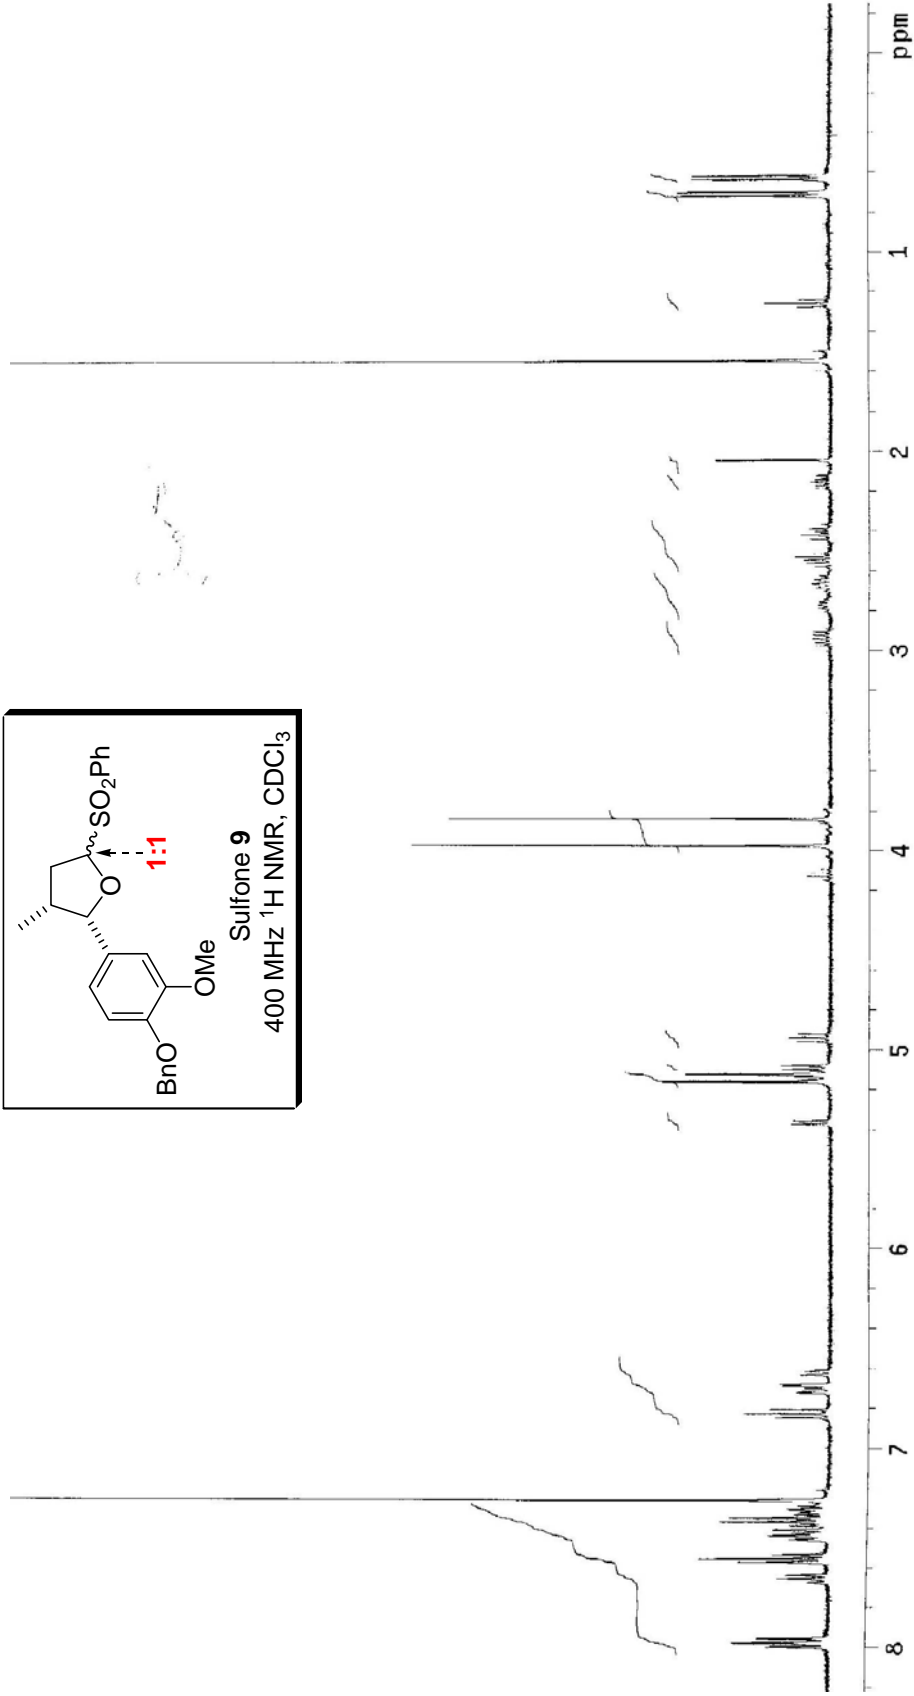

S36

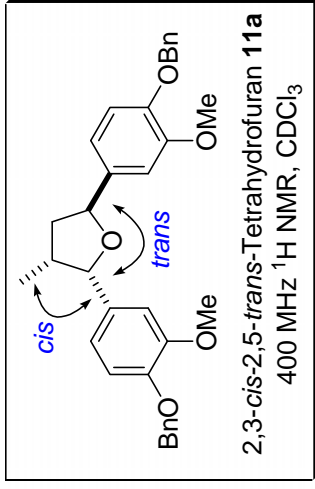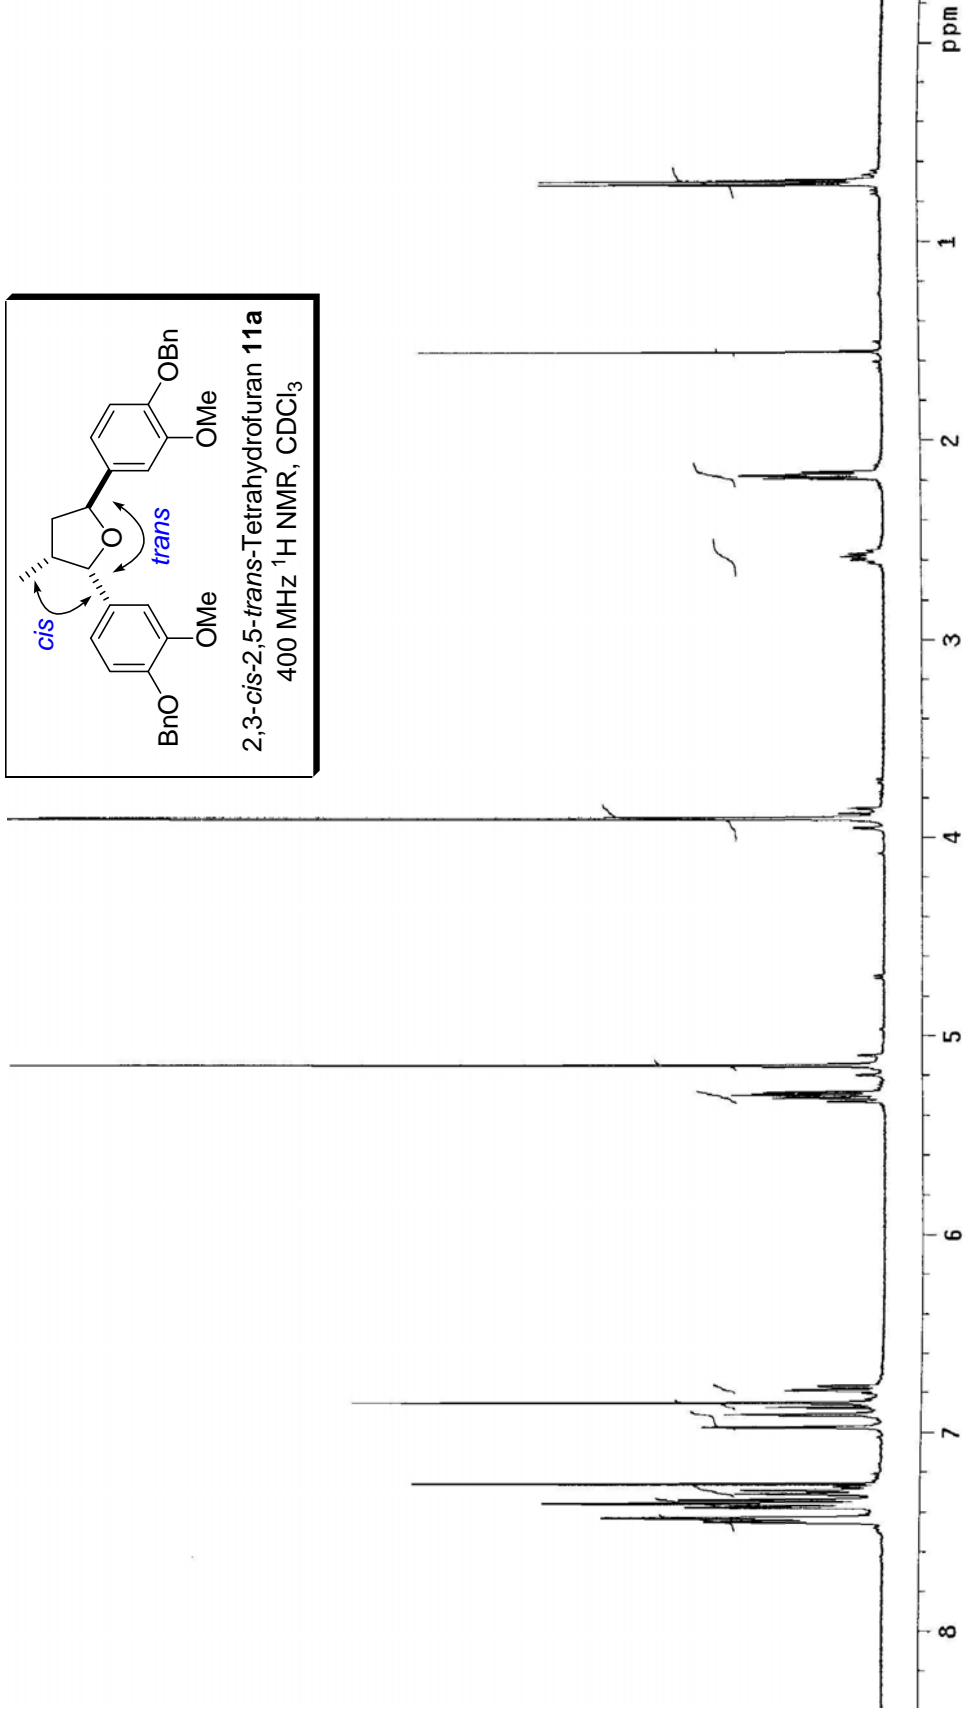

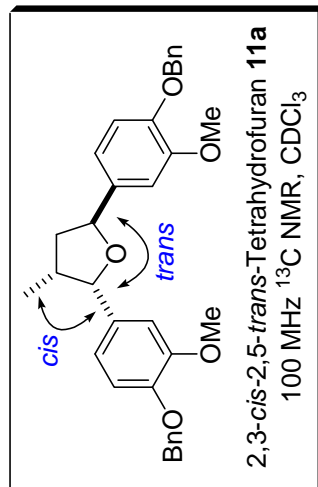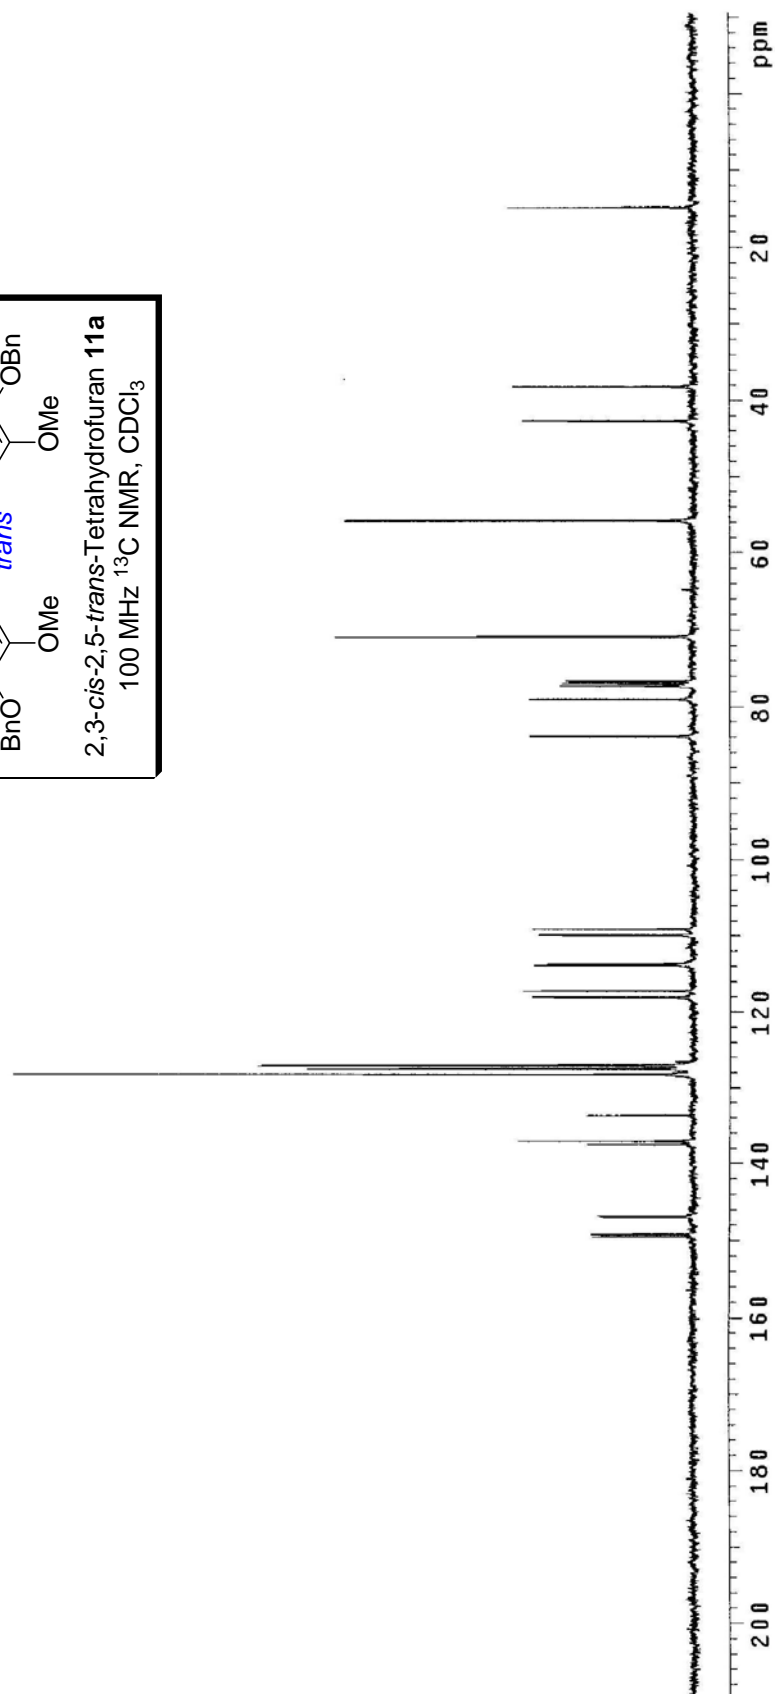

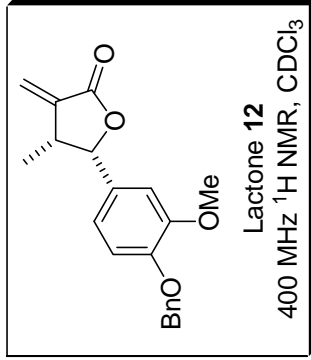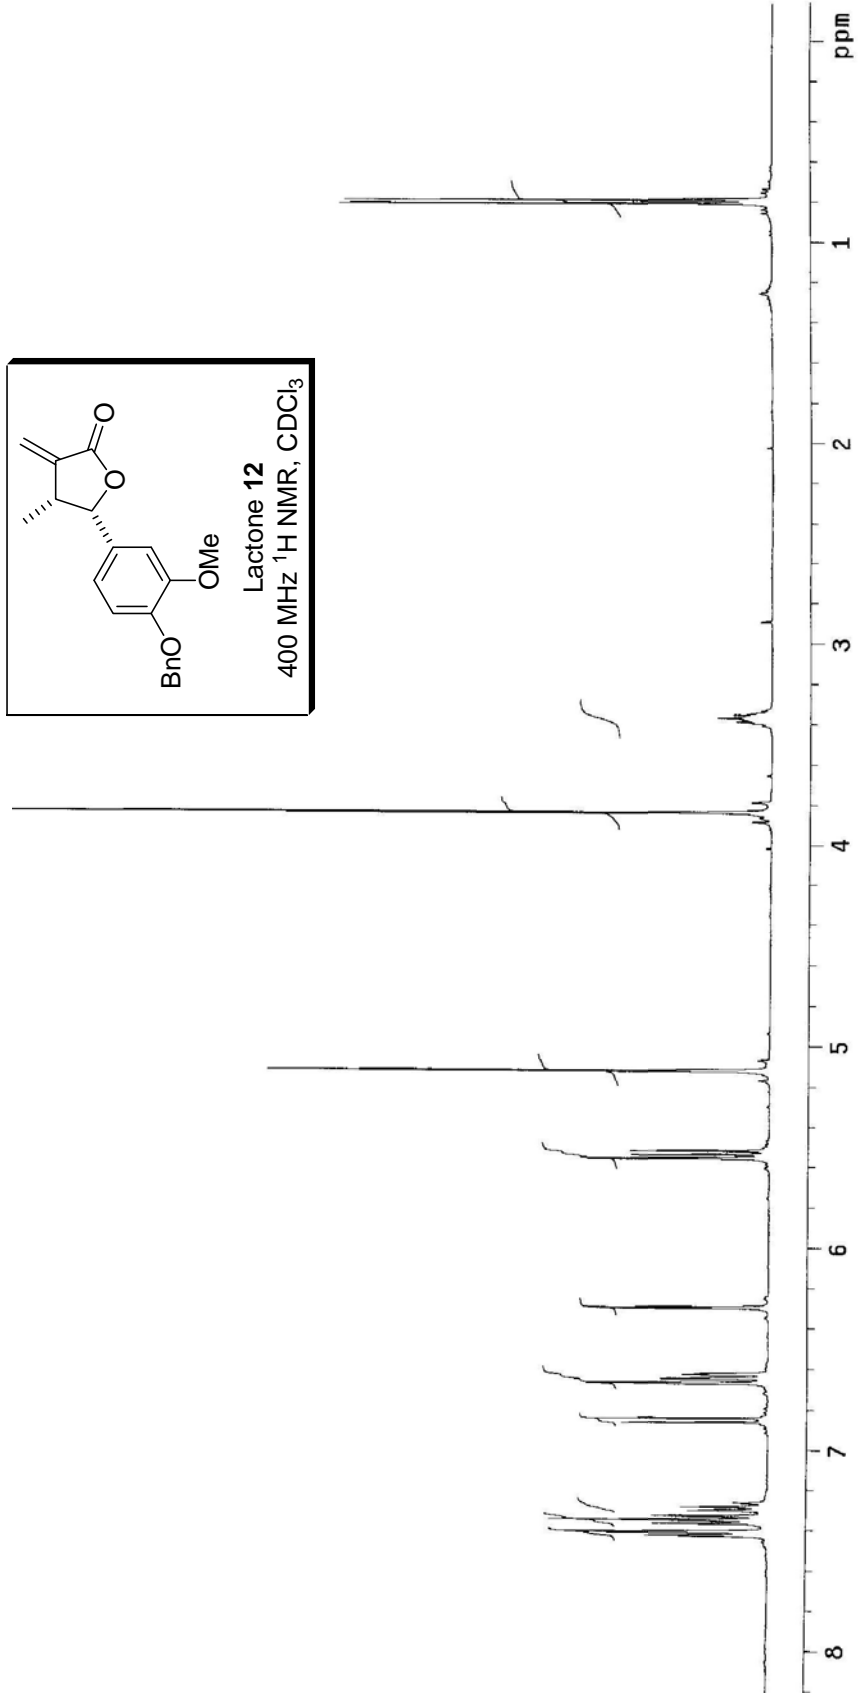

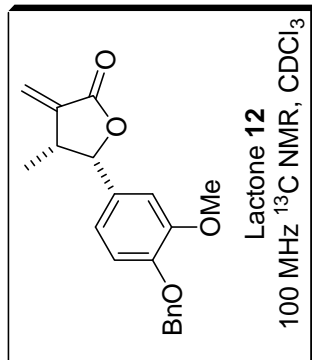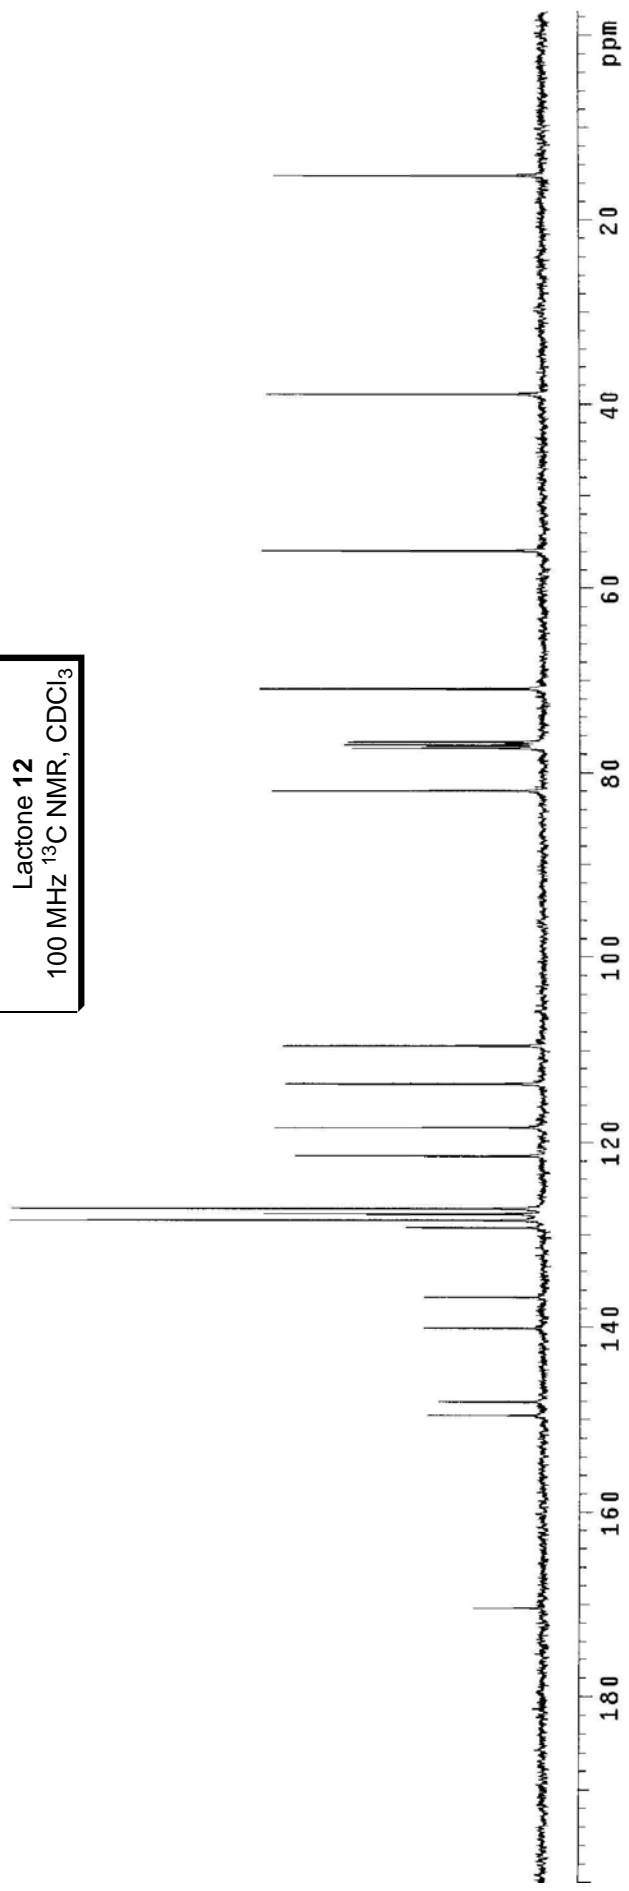



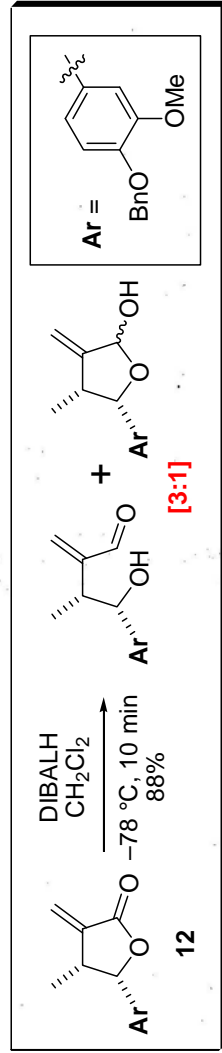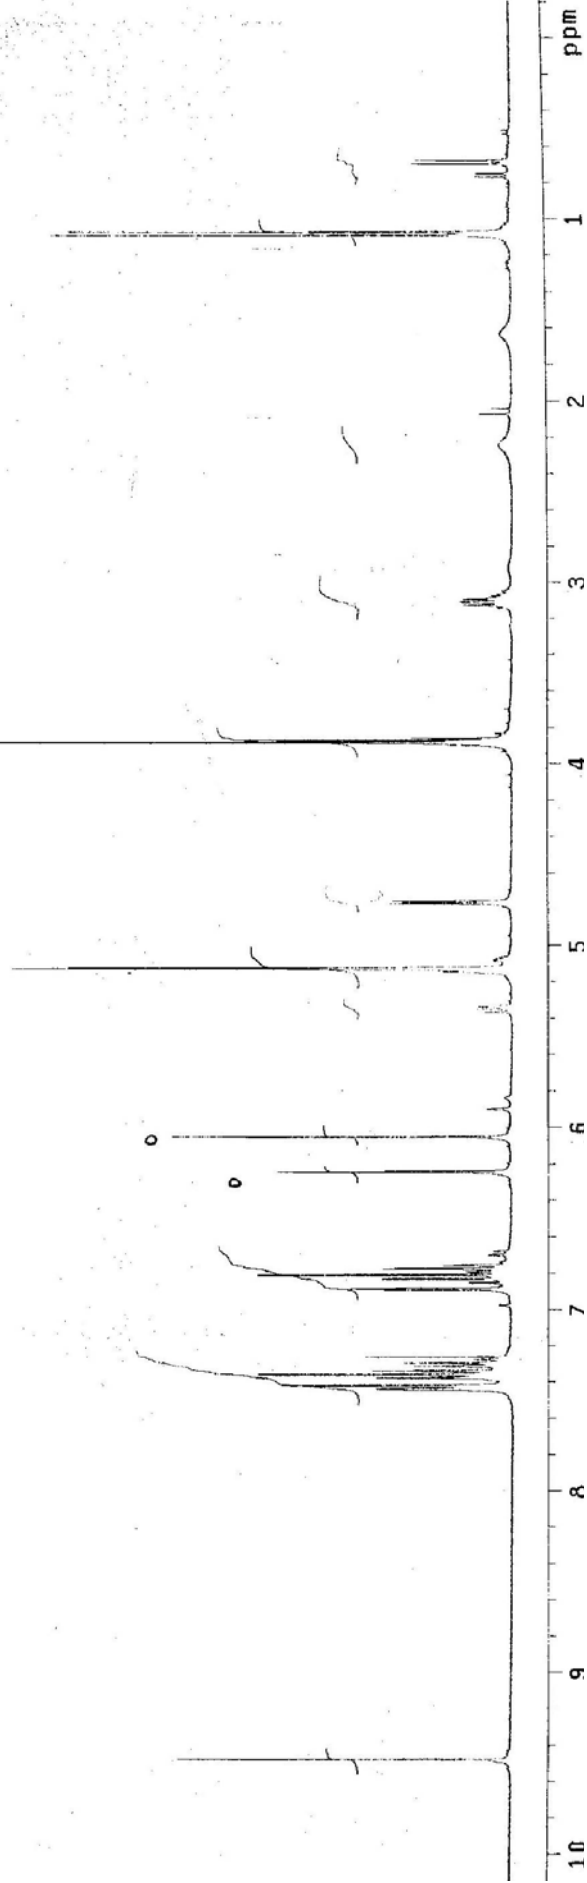

S41

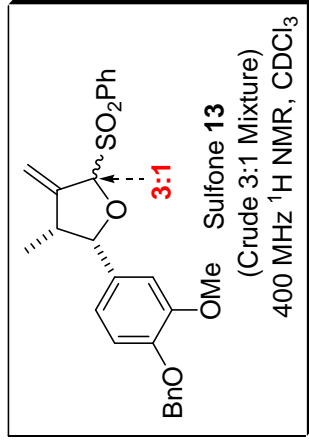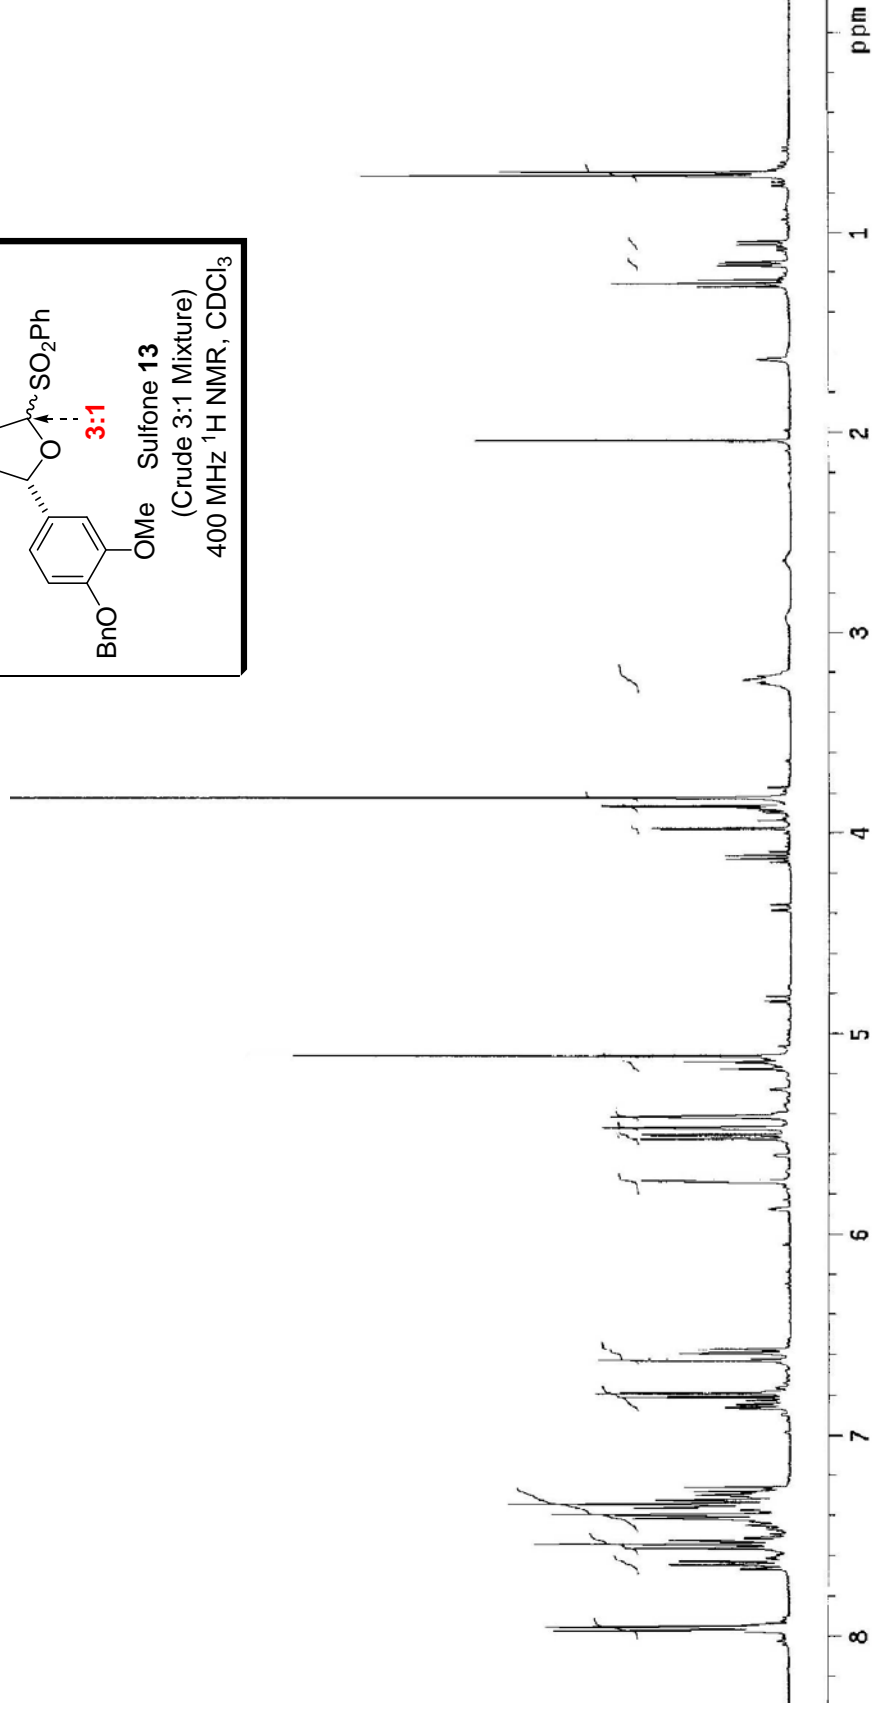

S42



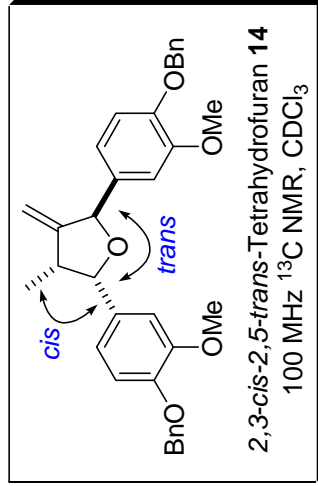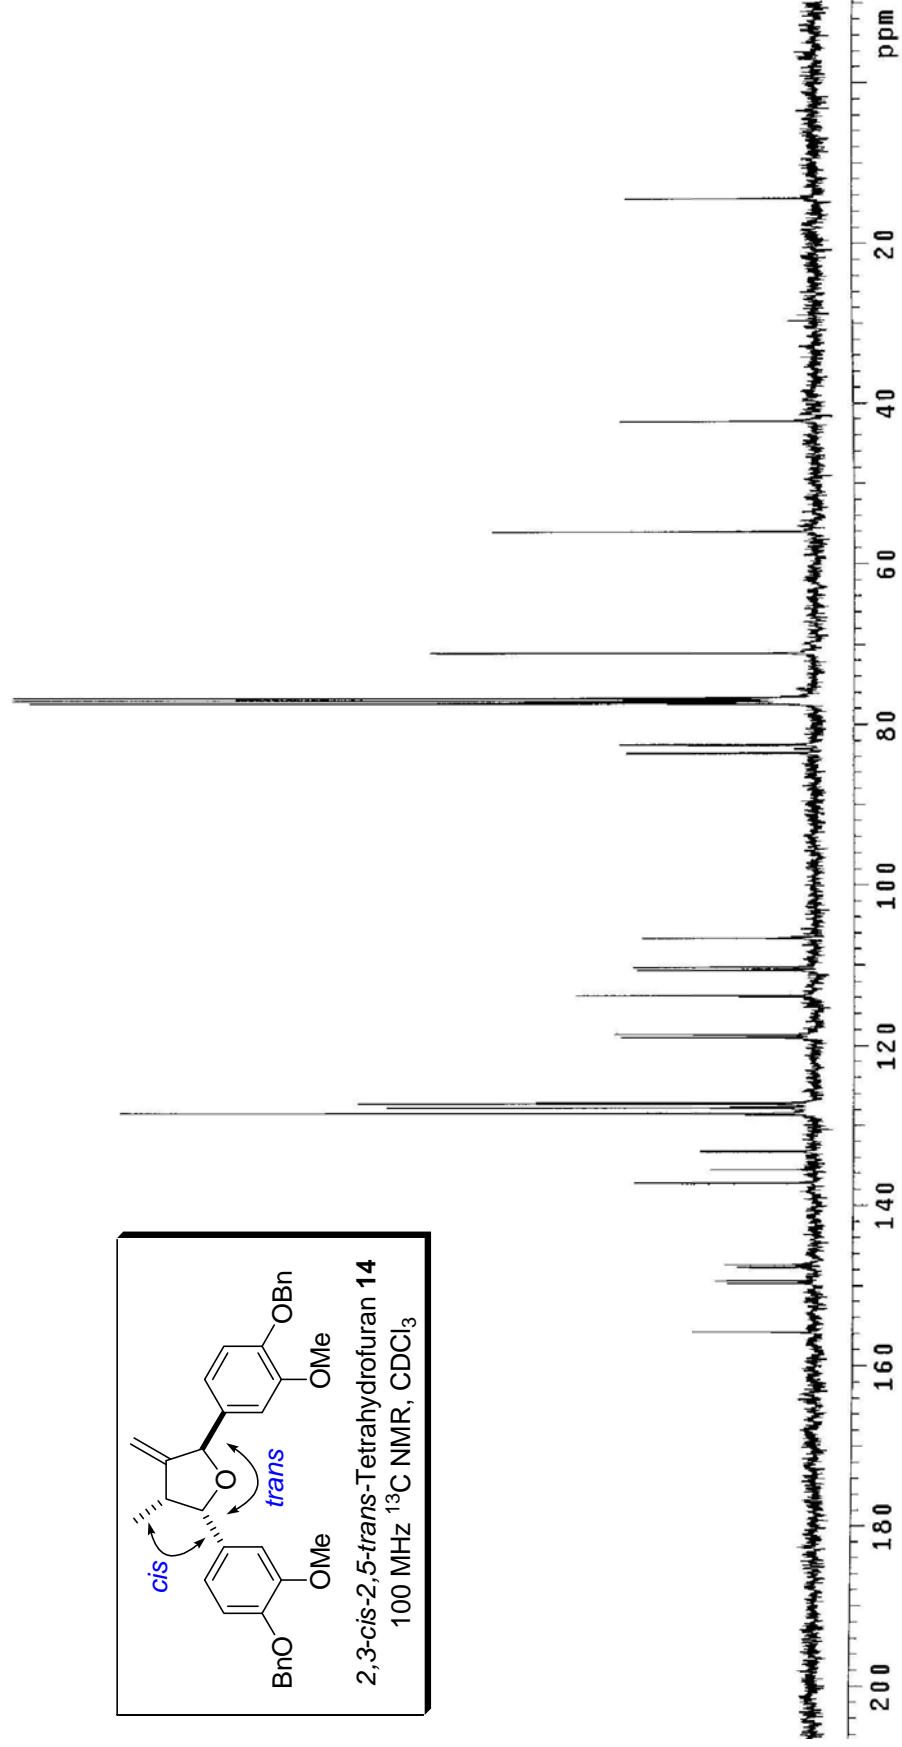

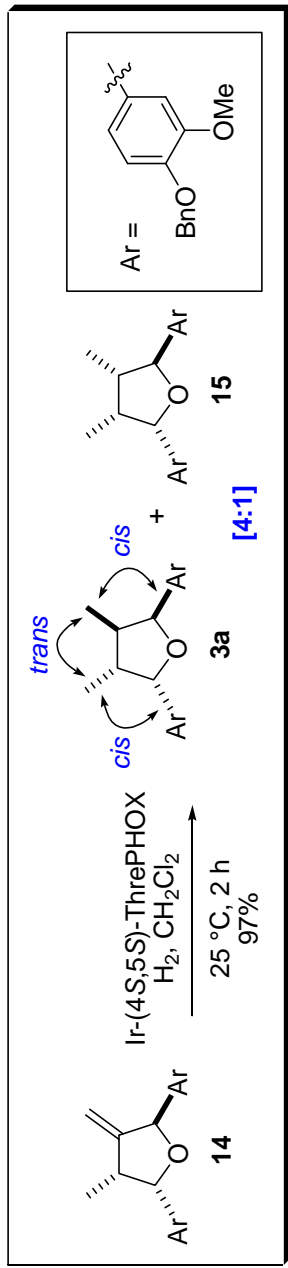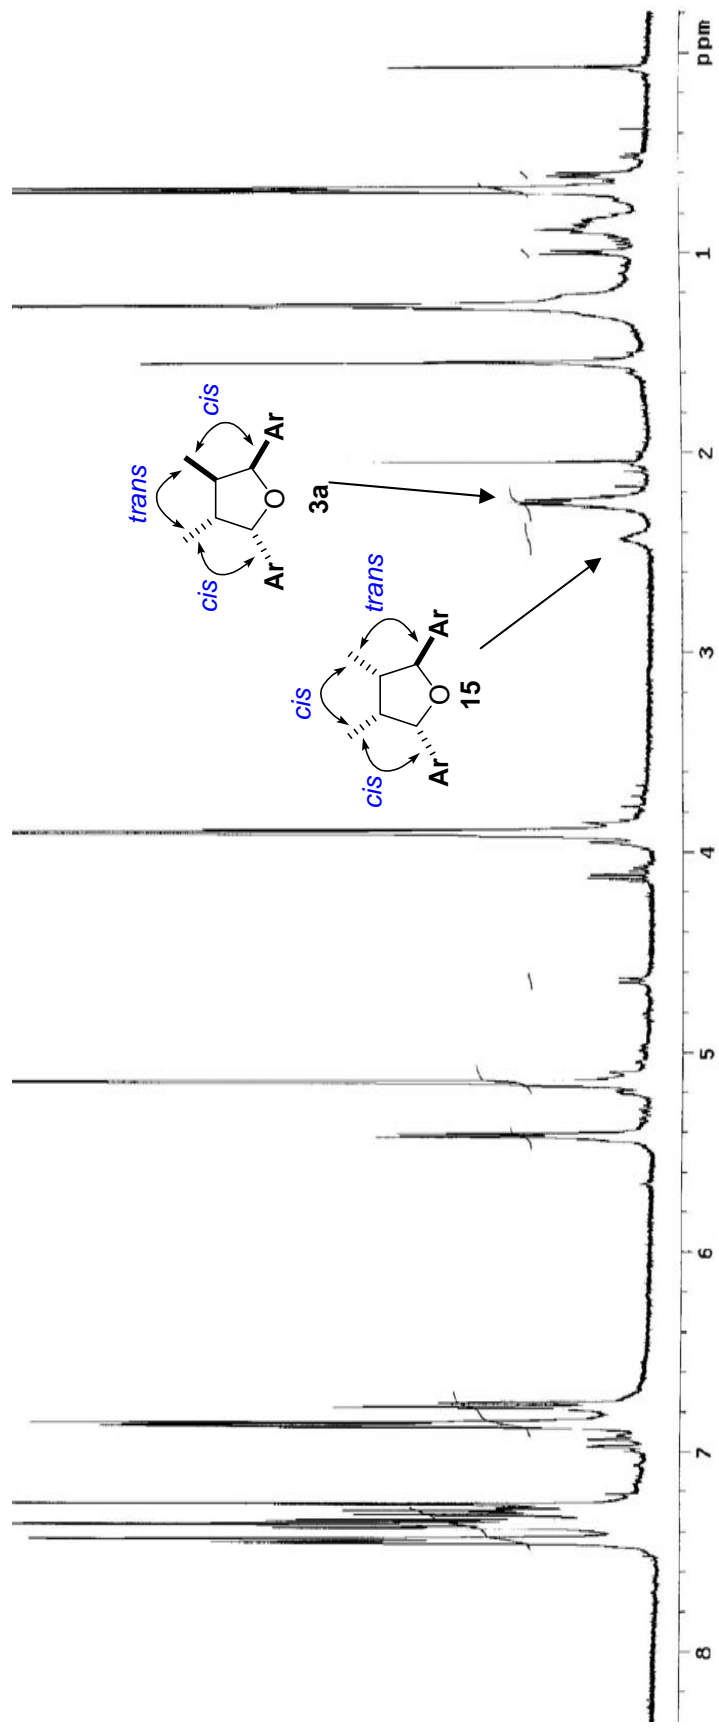

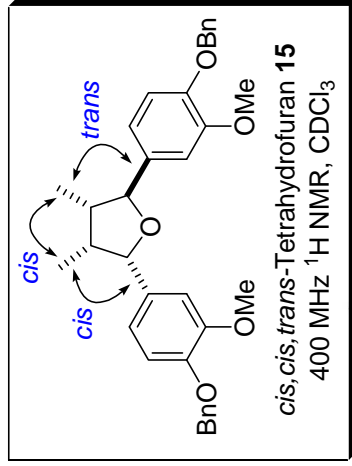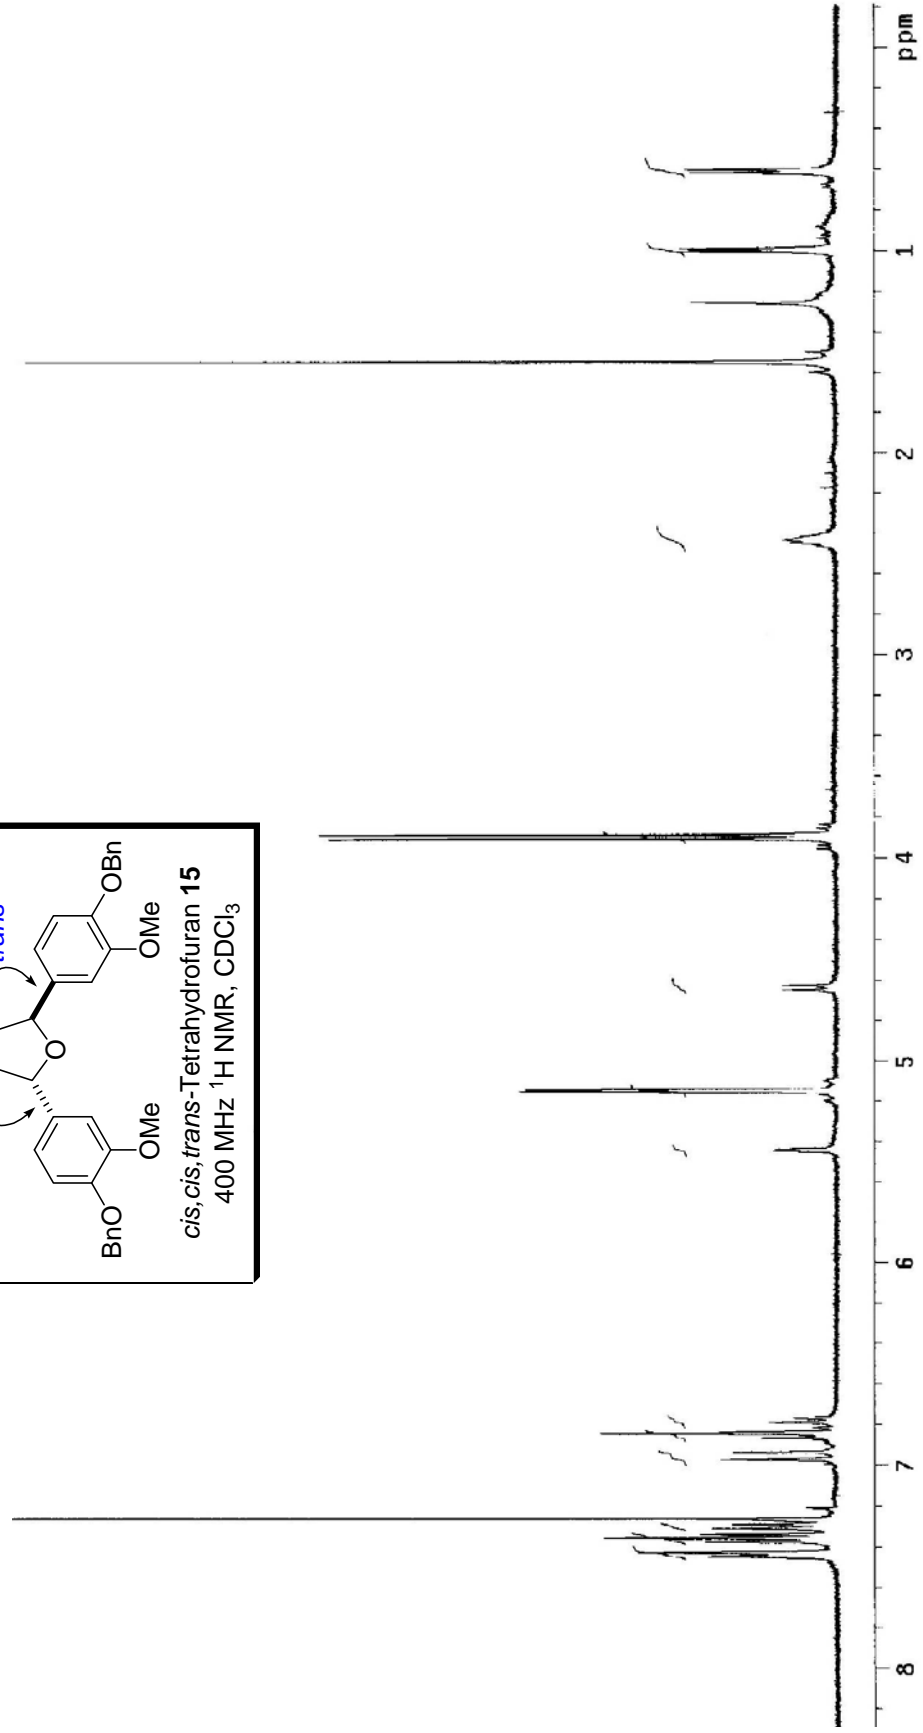

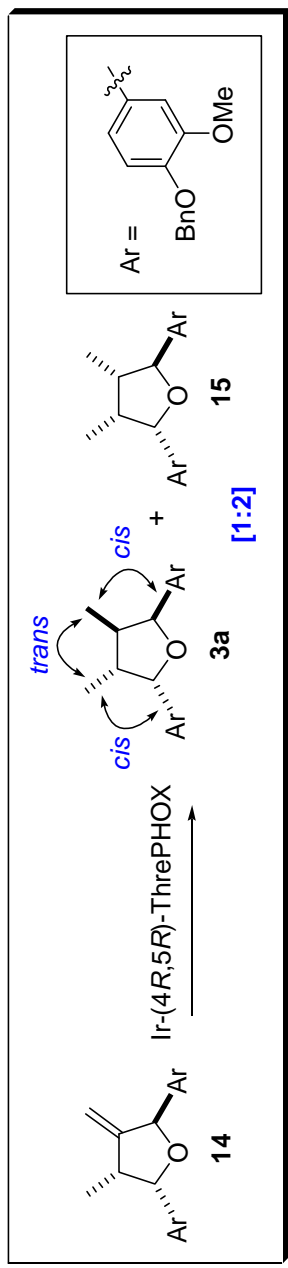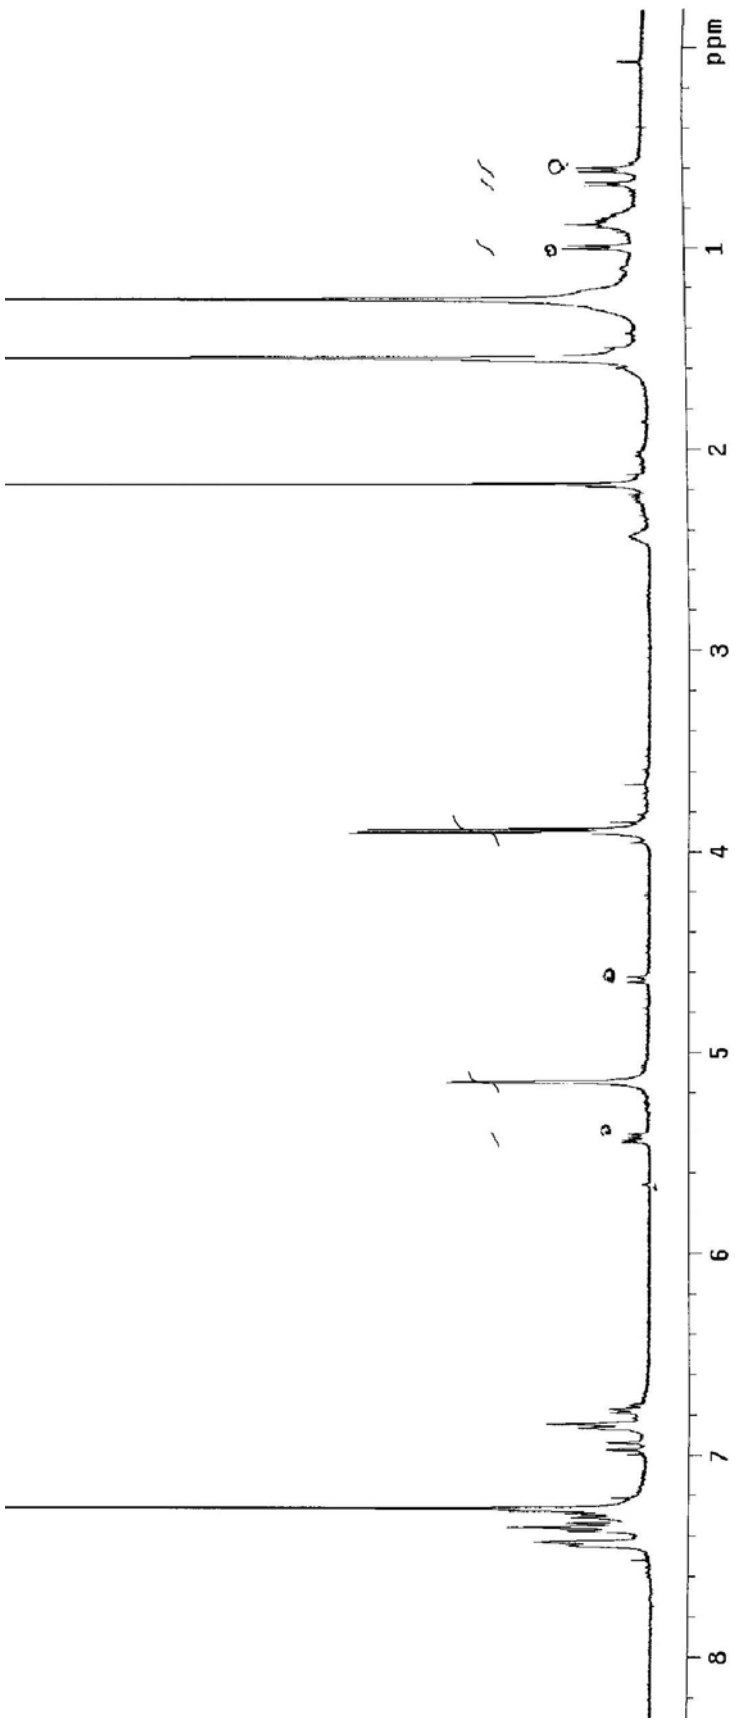

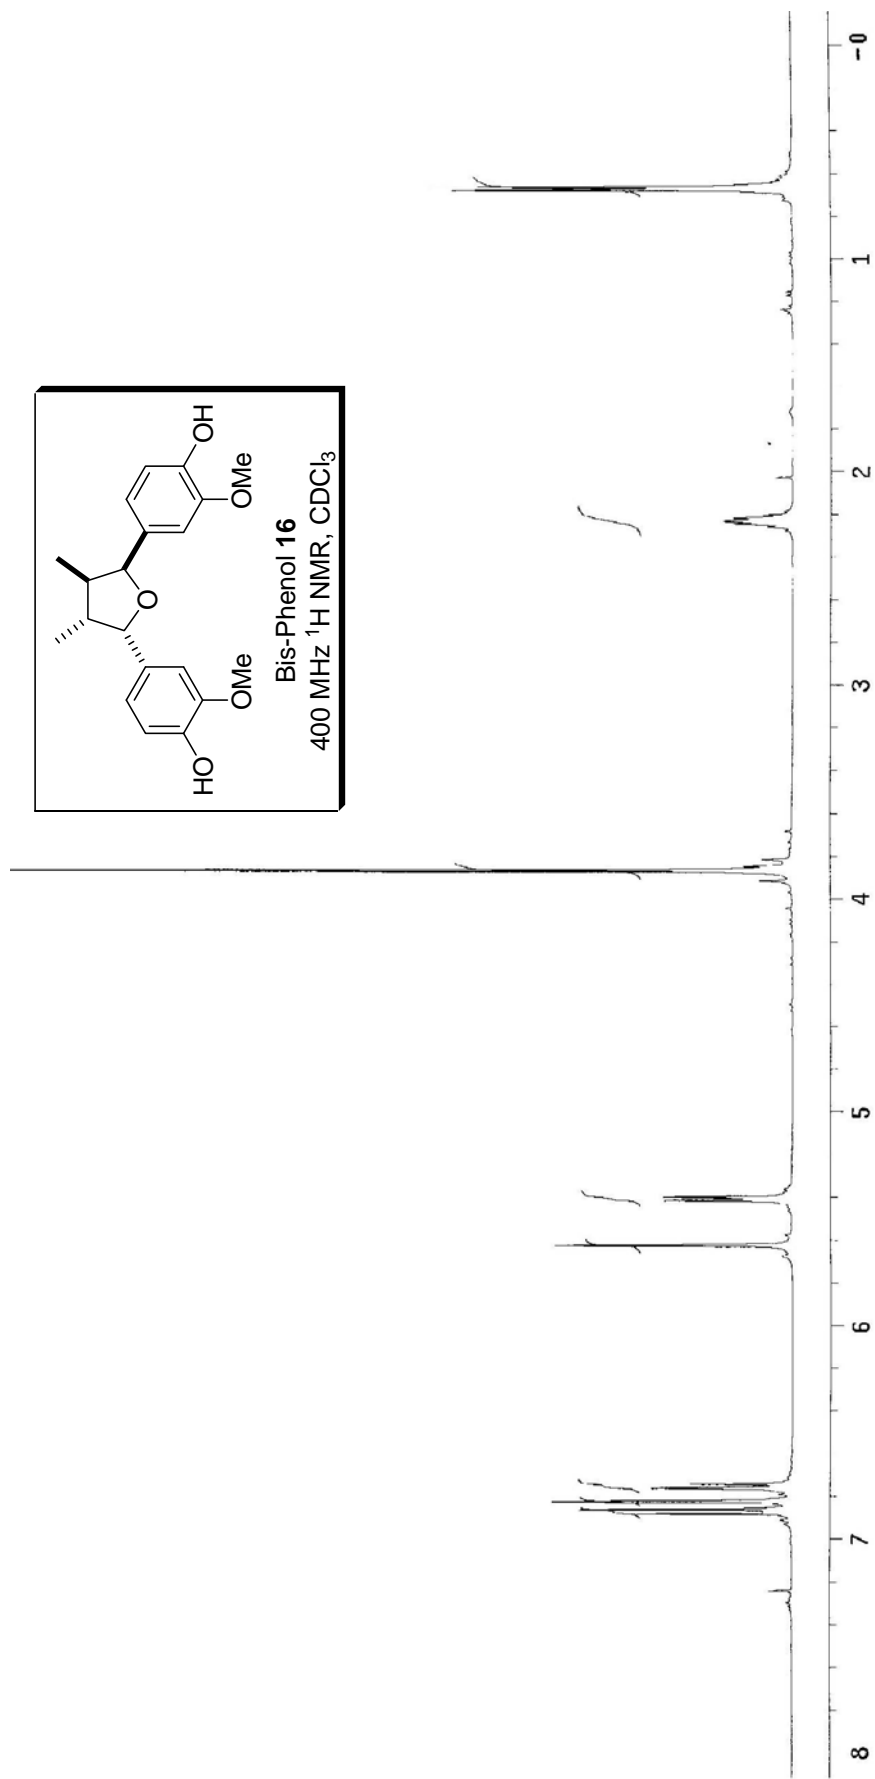

S48



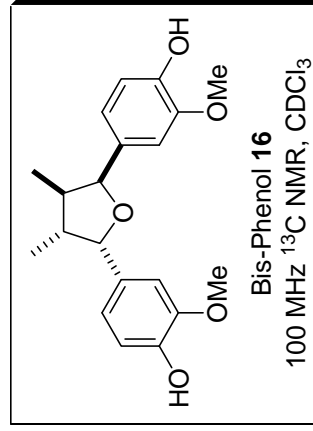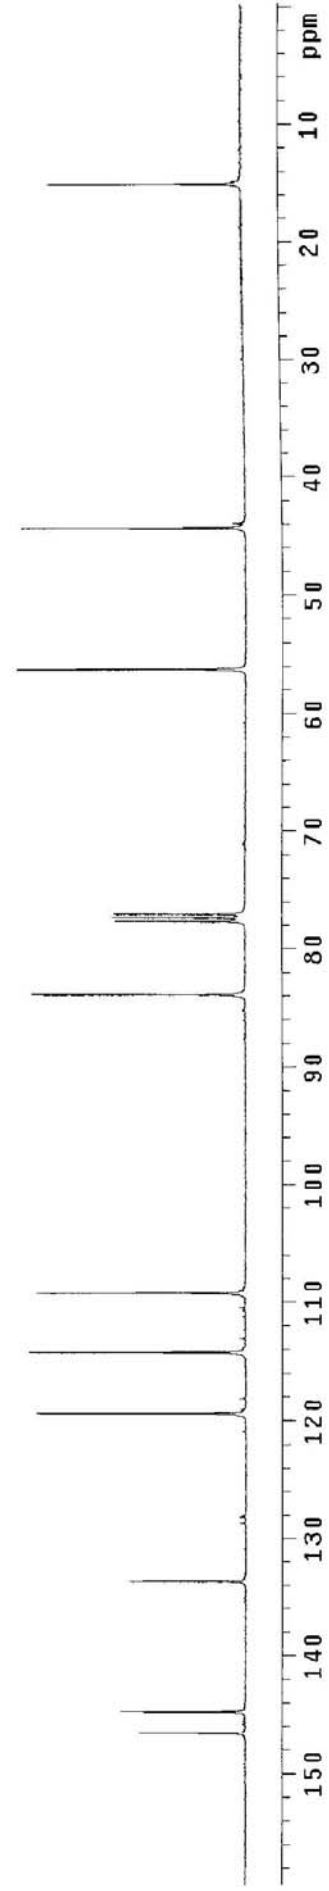

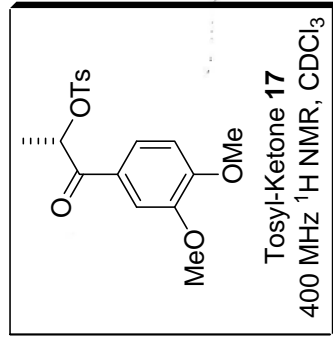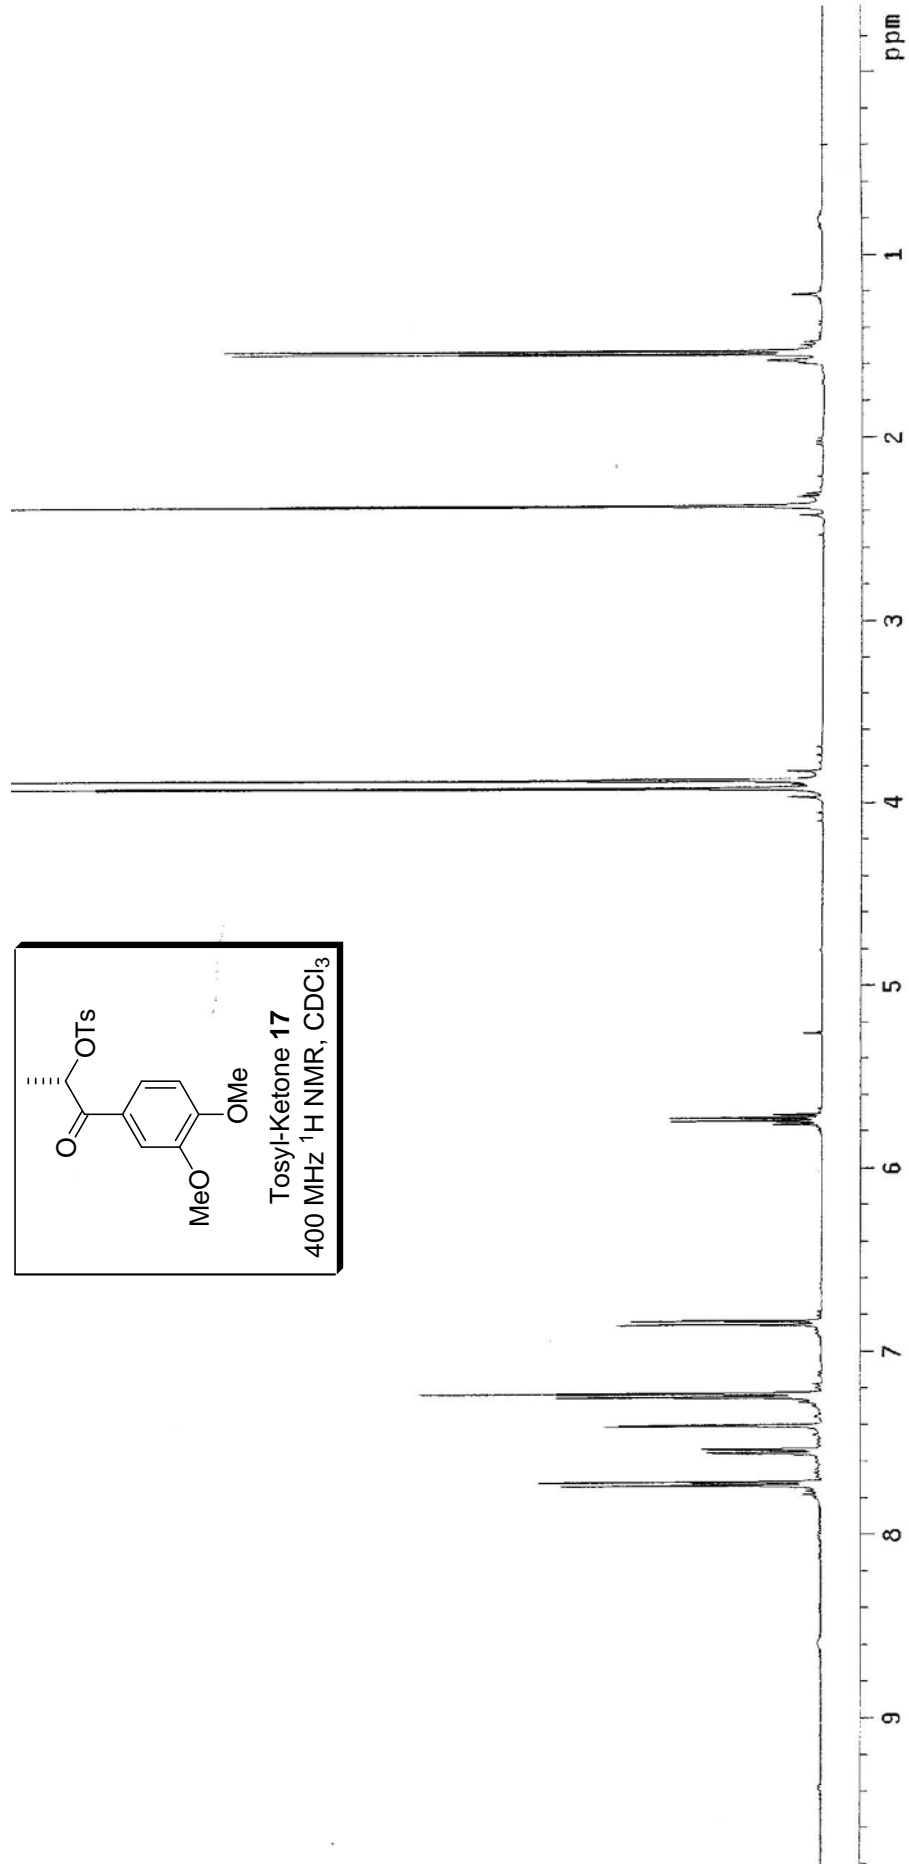

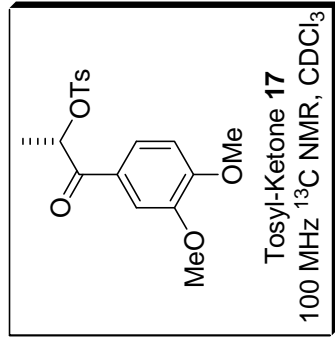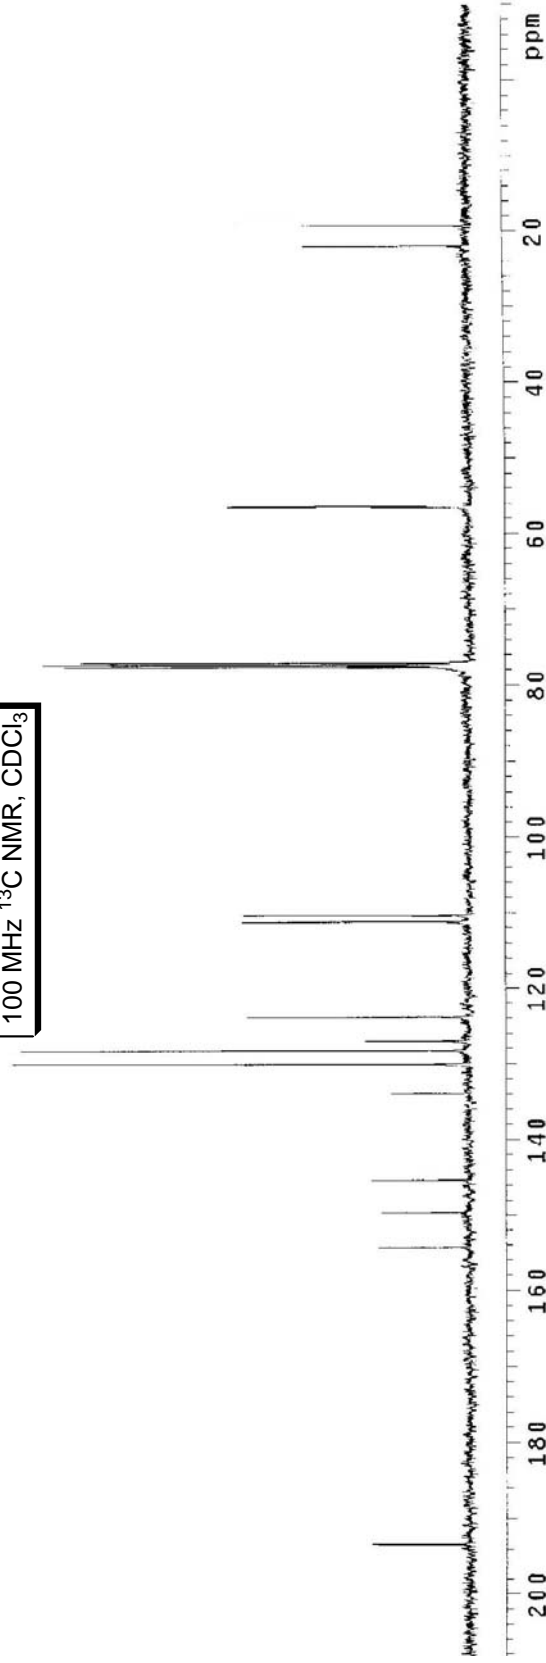

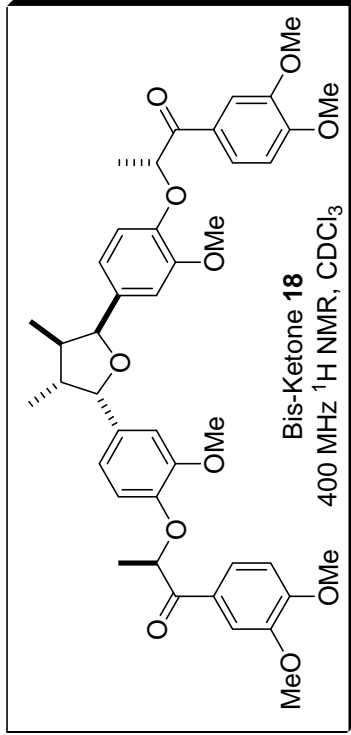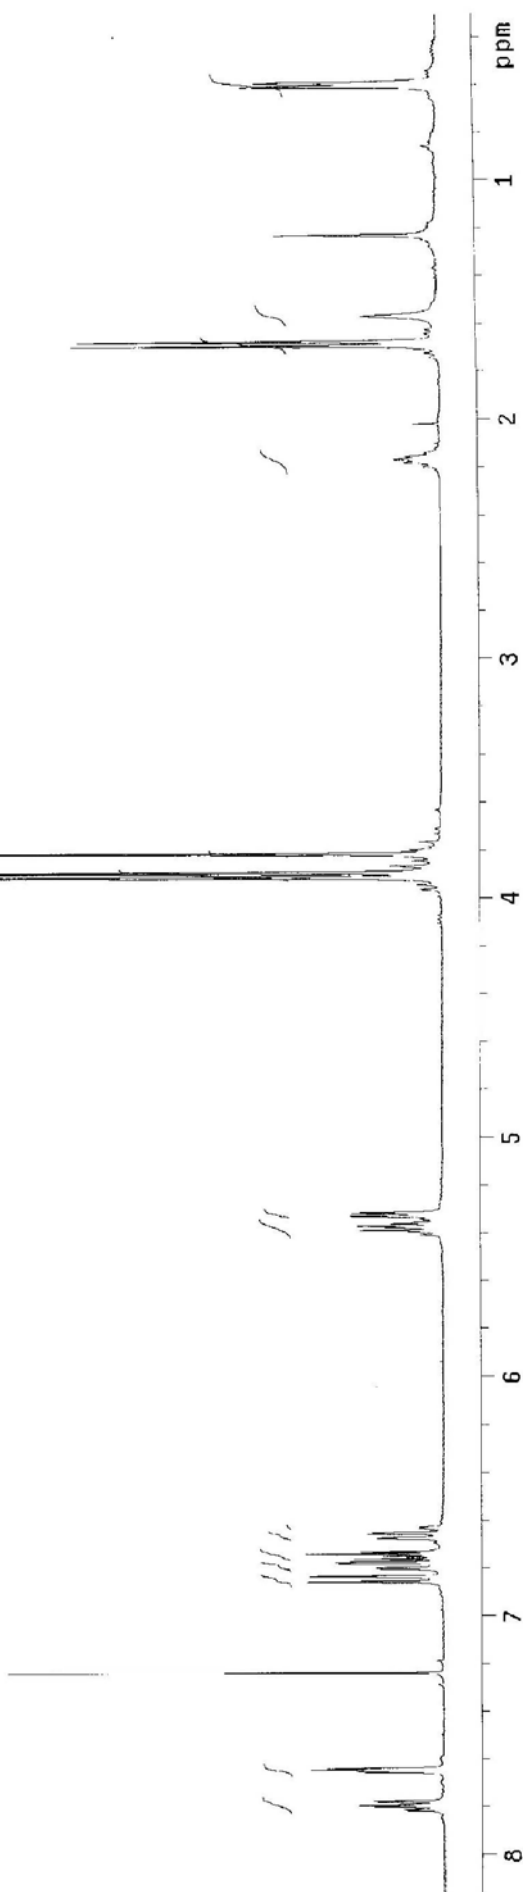



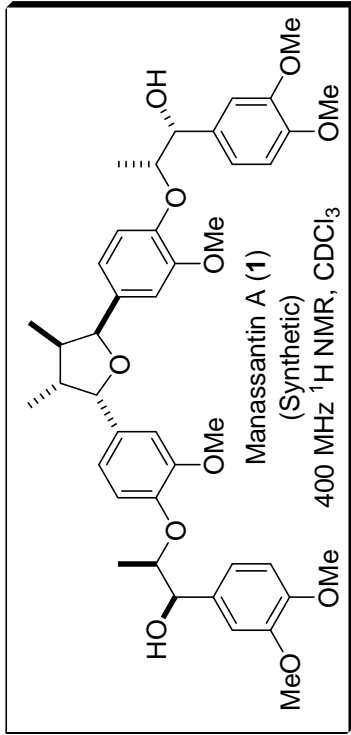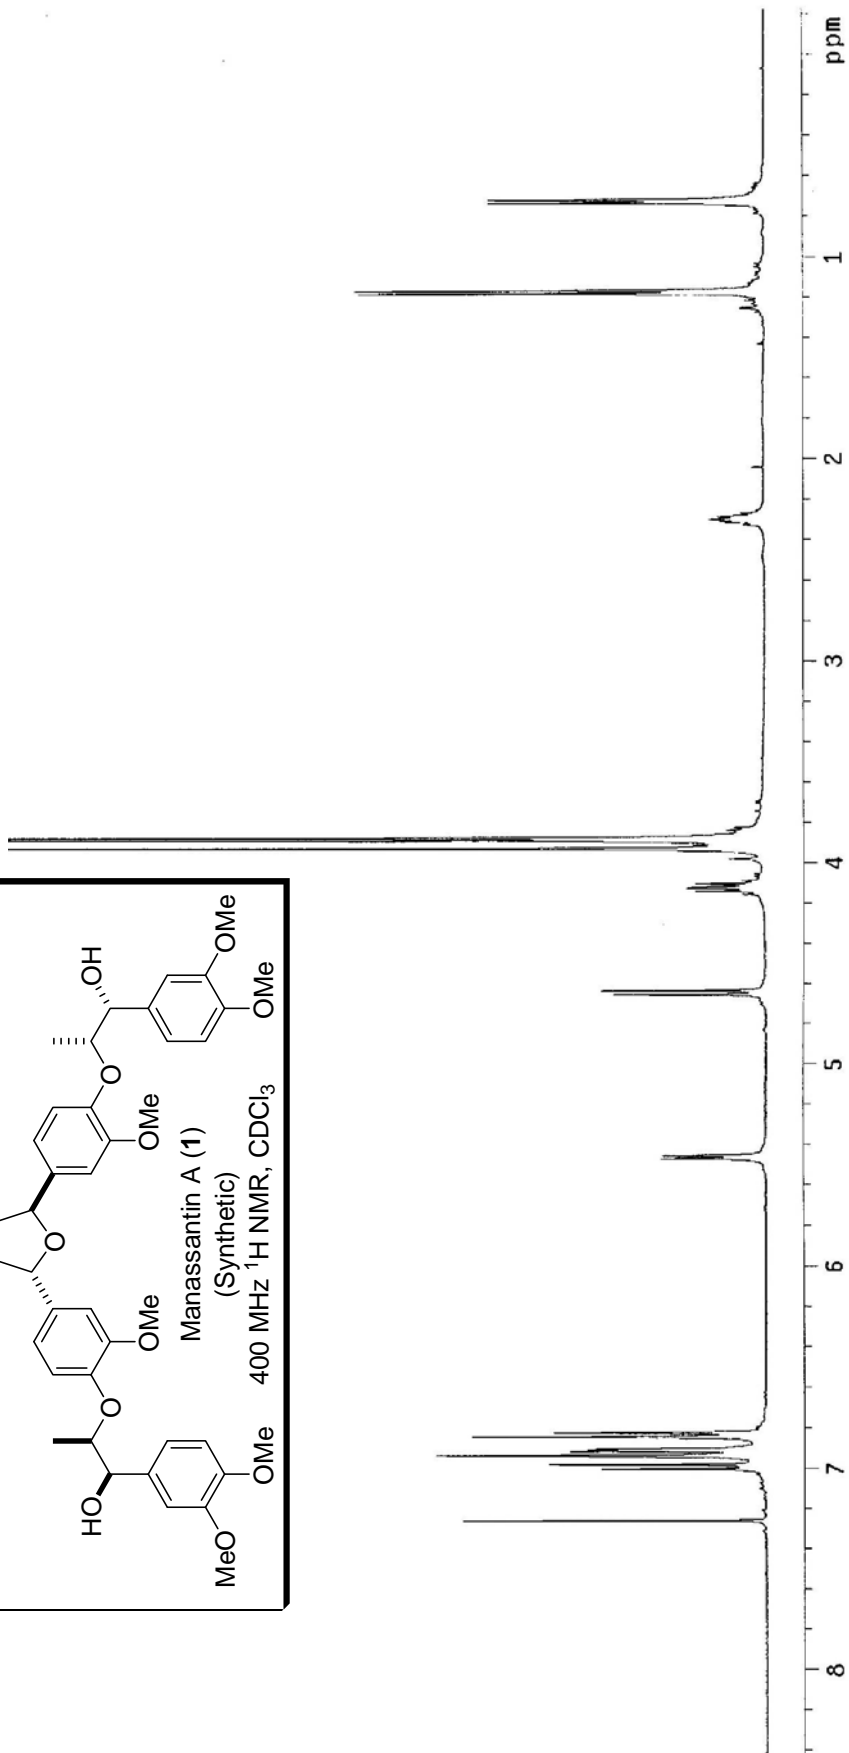

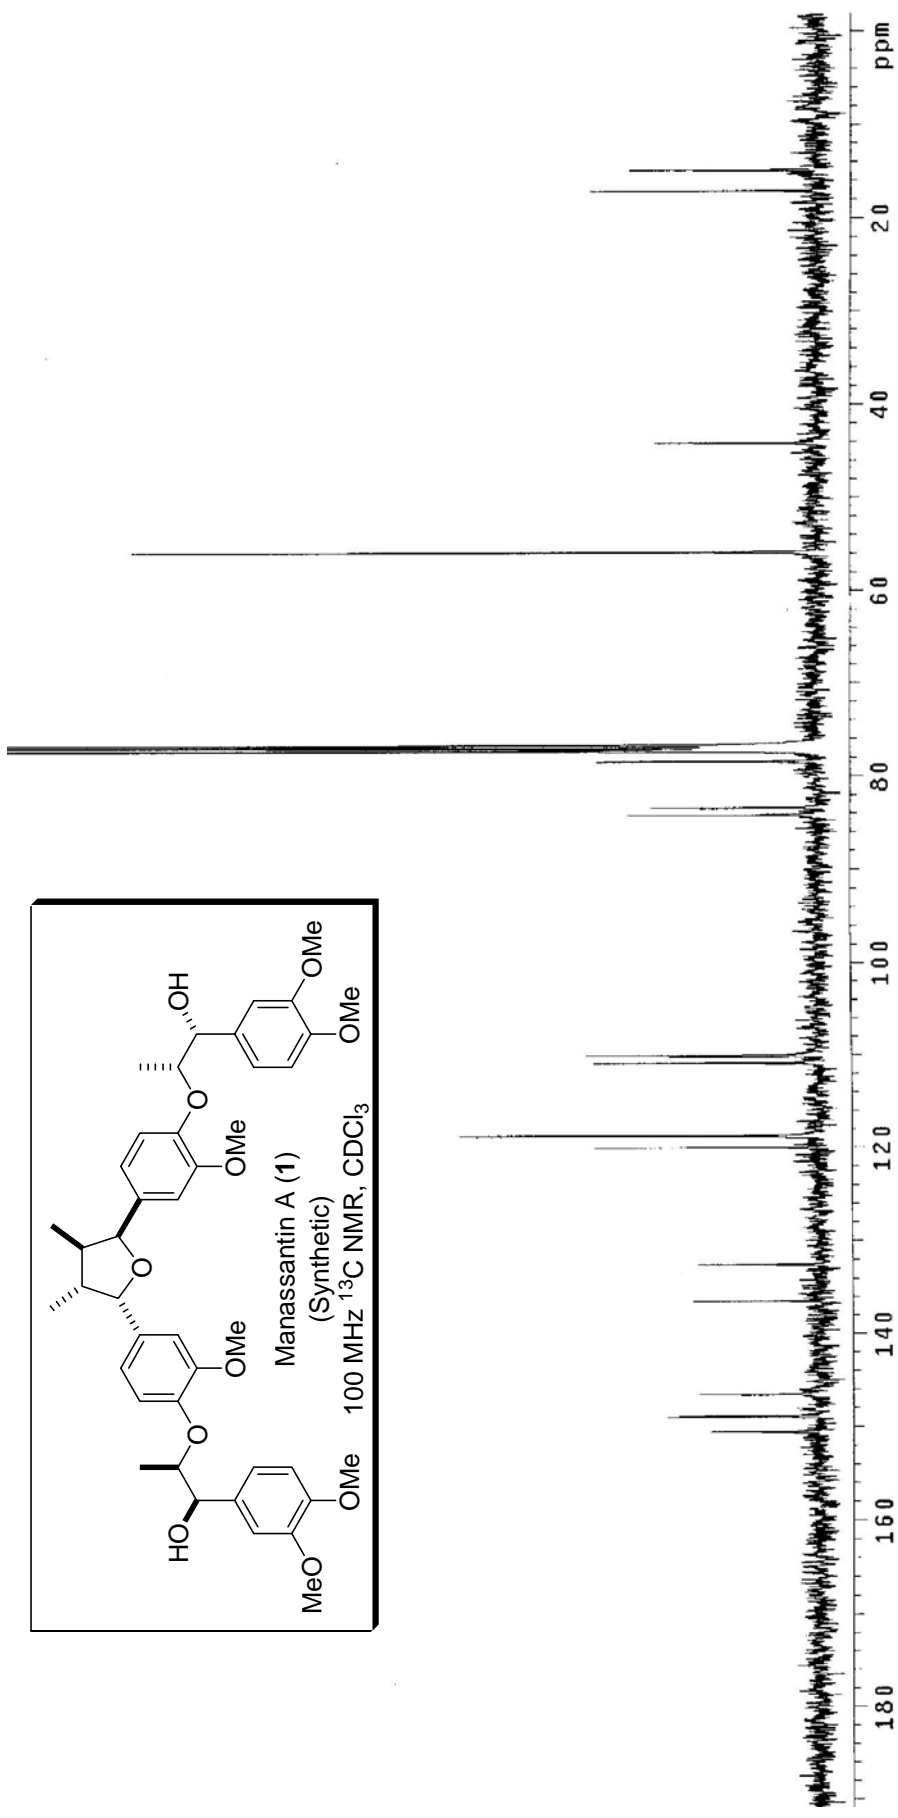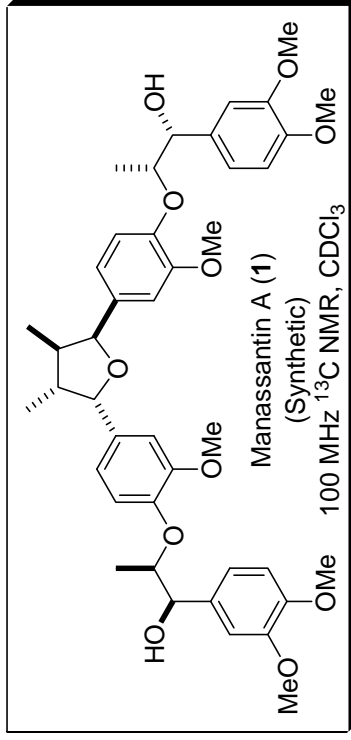

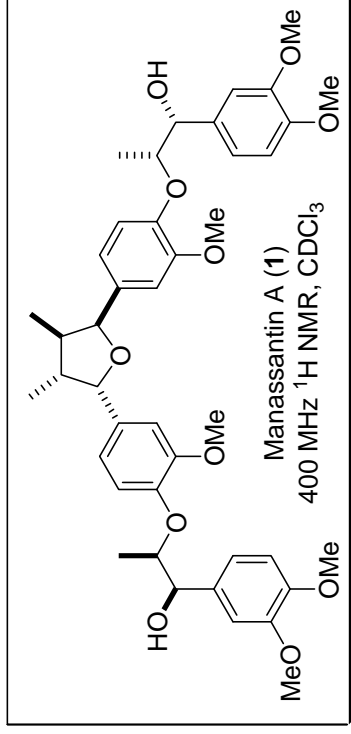

Hanessian's  
Synthetic

Hong's  
Synthetic

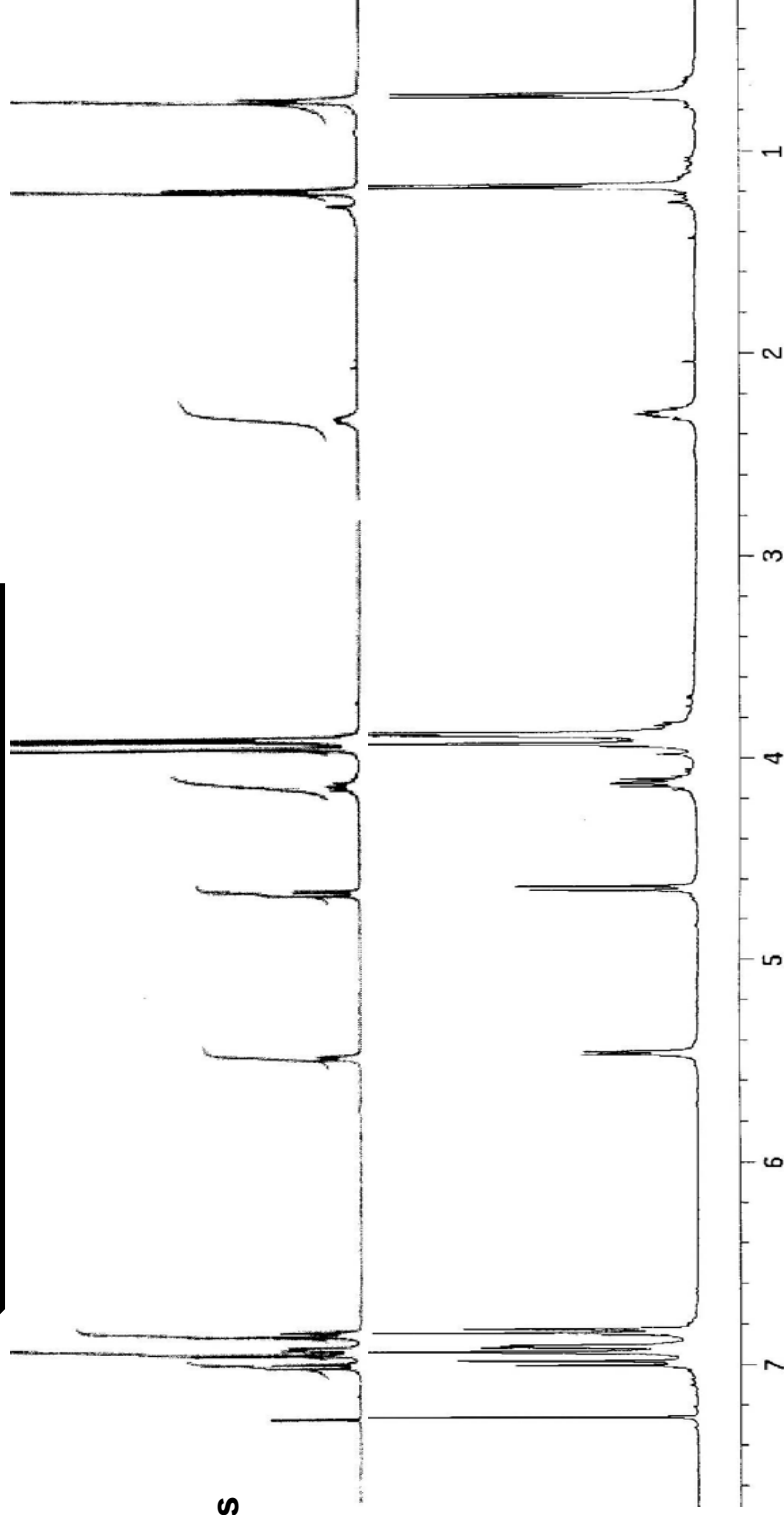



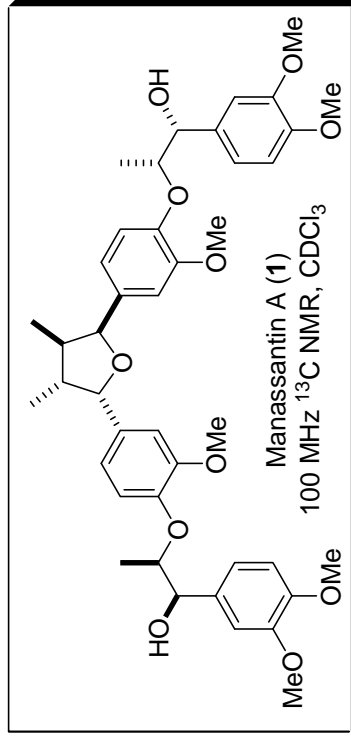

Hanessian's  
Synthetic

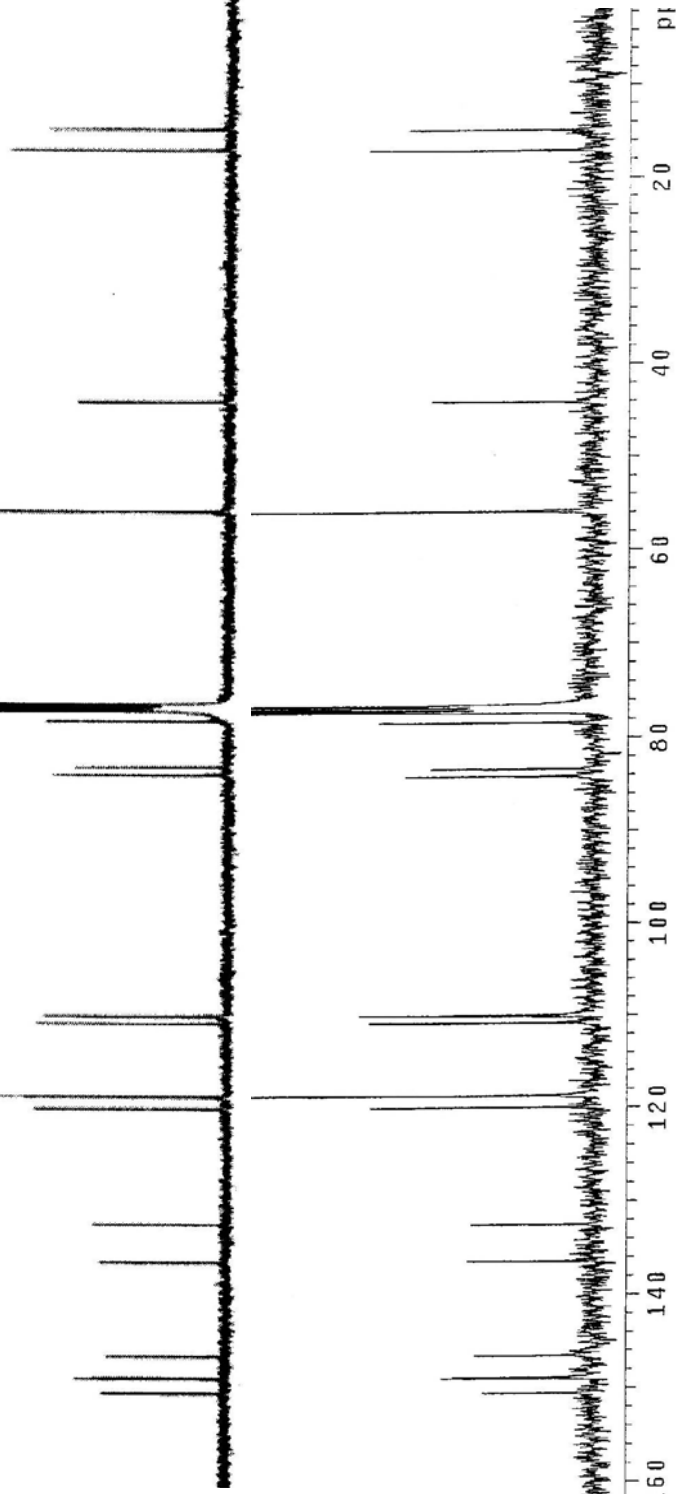

Hong's  
Synthetic

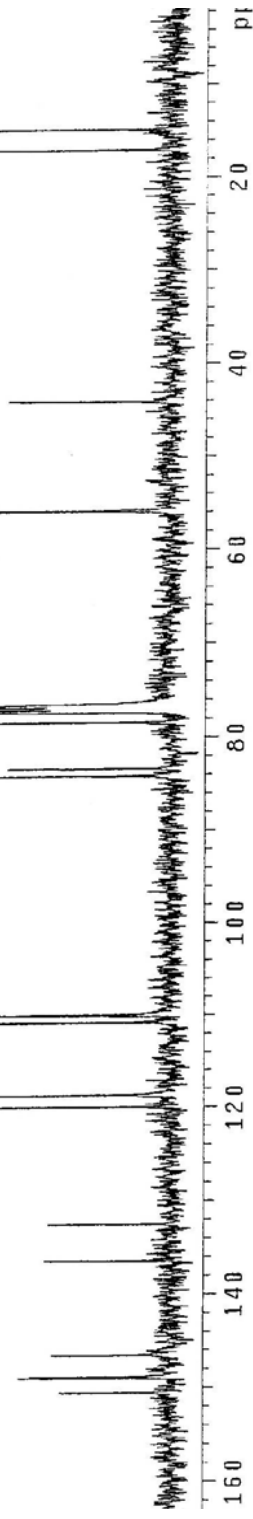

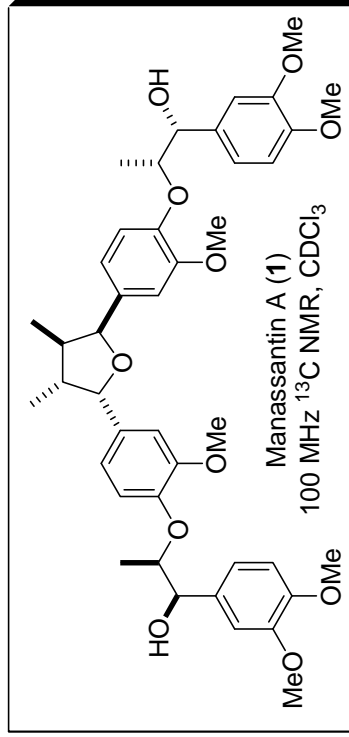

Hanessian's  
Synthetic

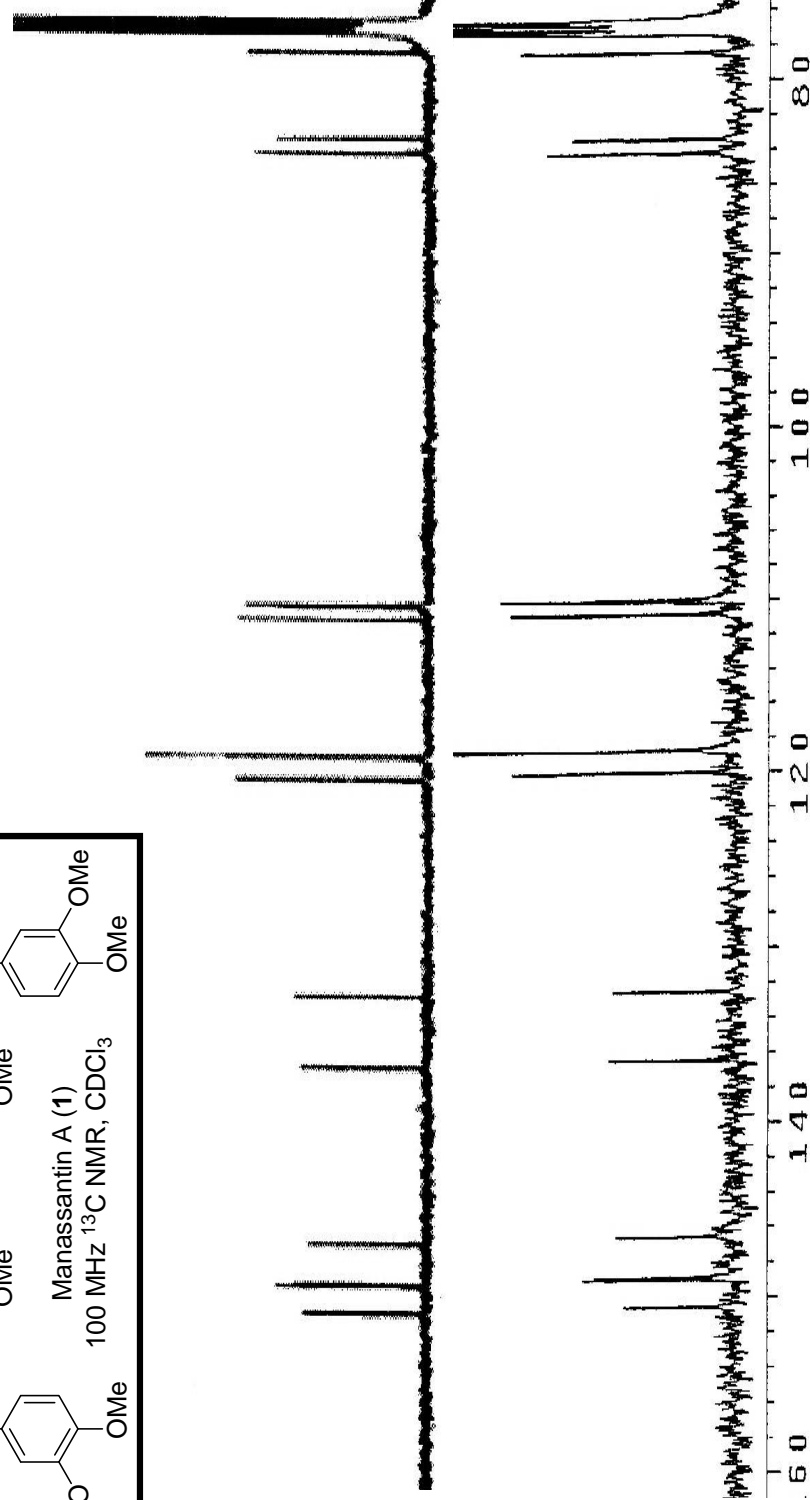

Hong's  
Synthetic

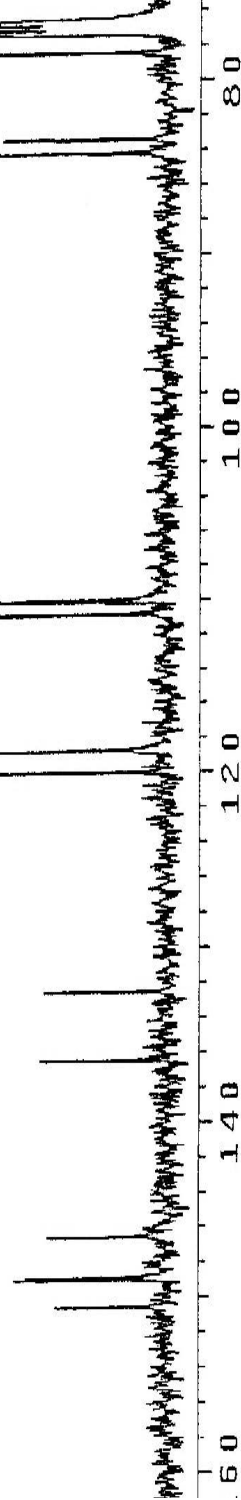

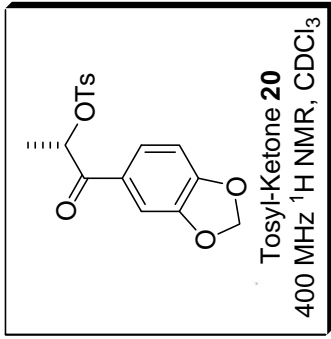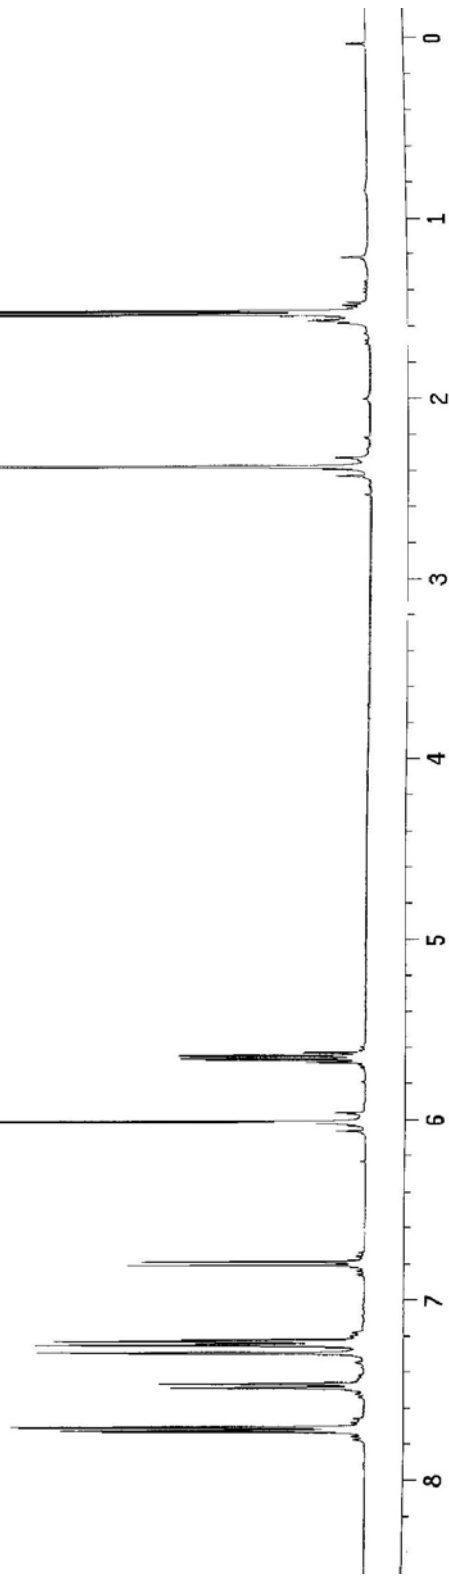

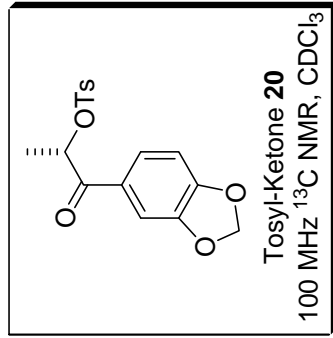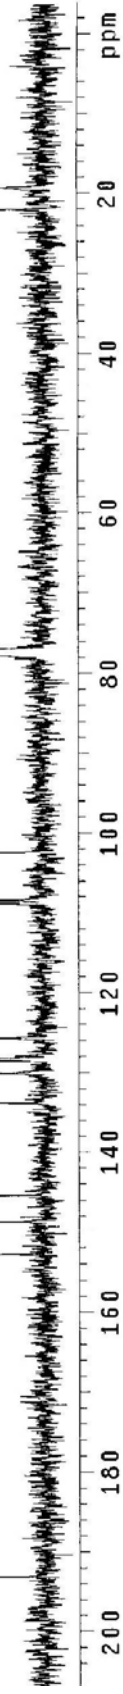

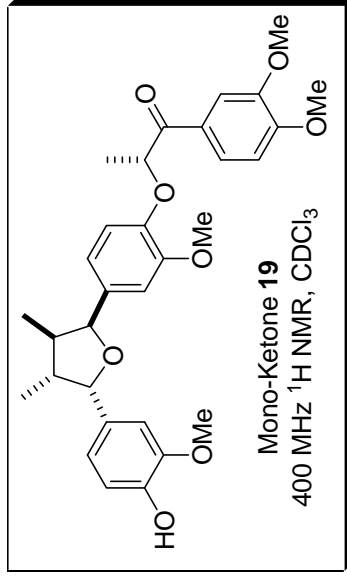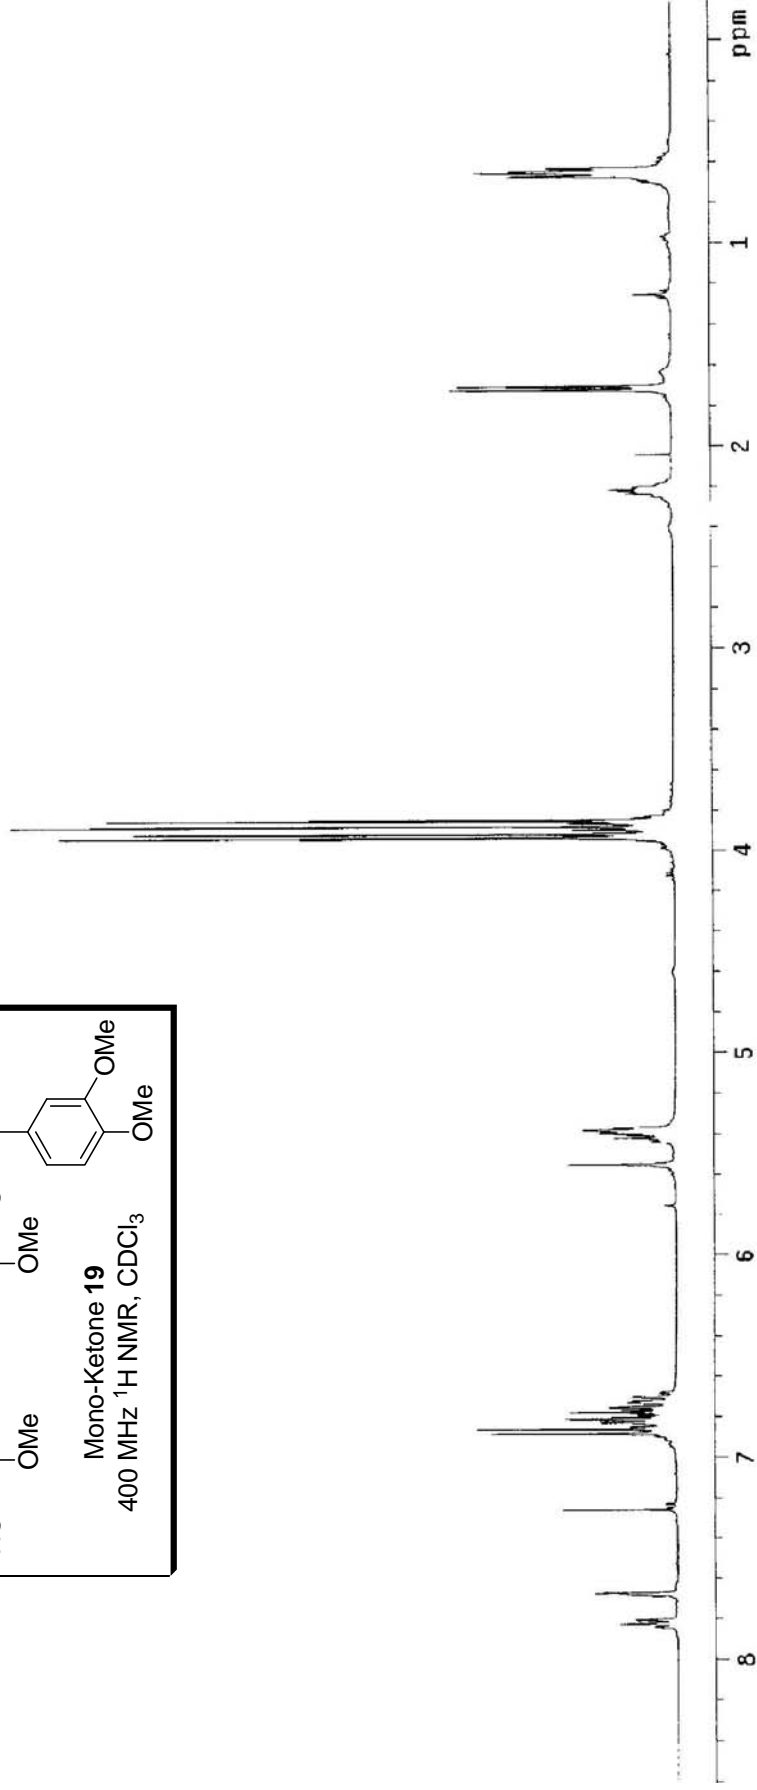

S61

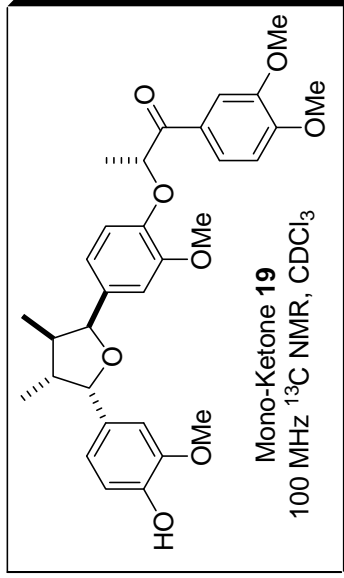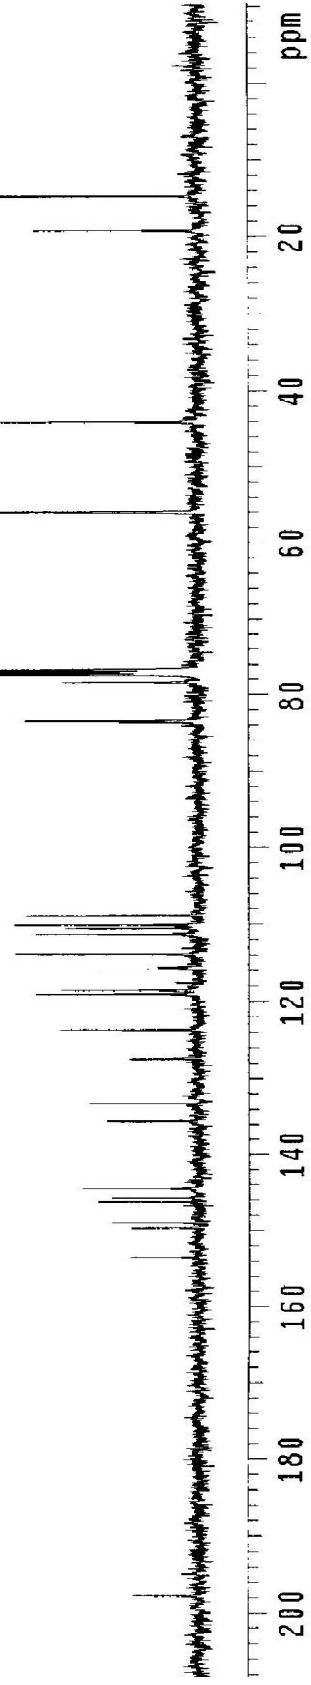

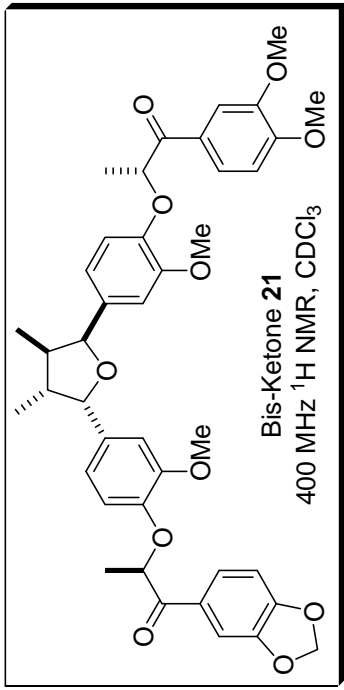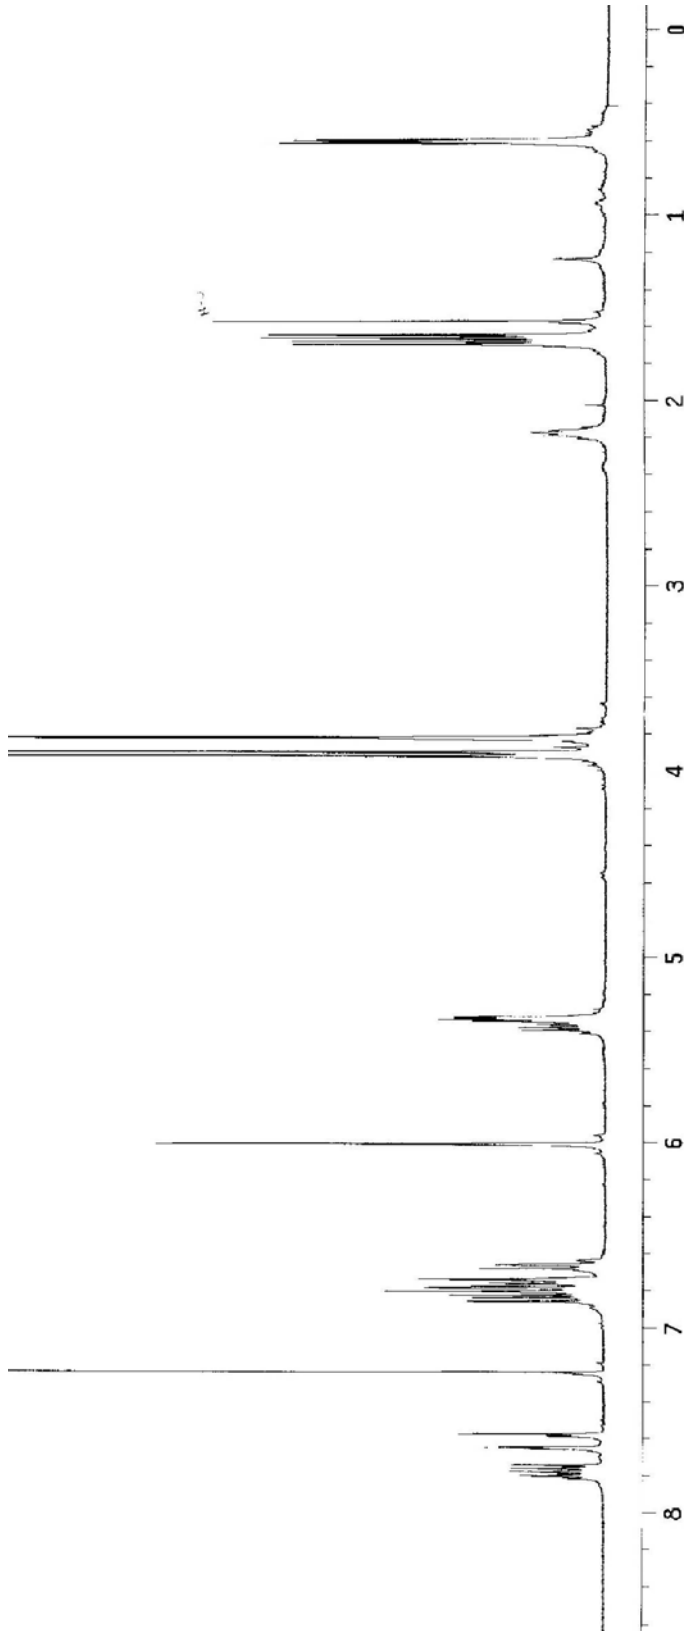

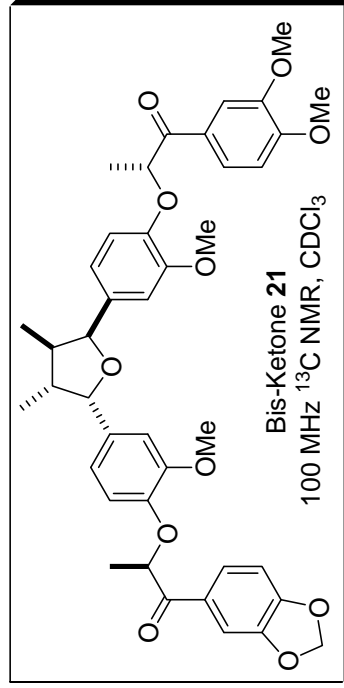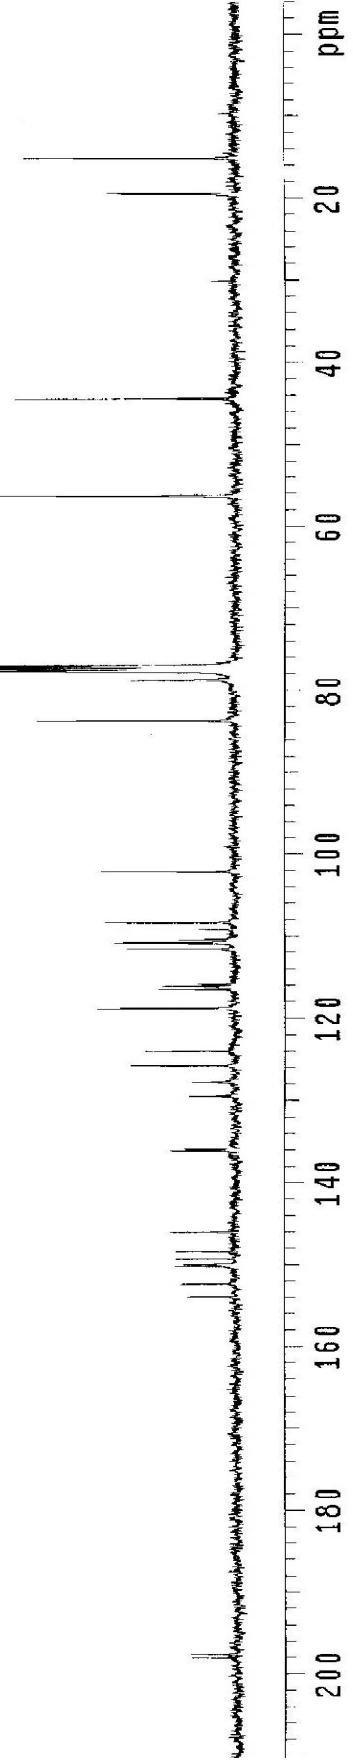



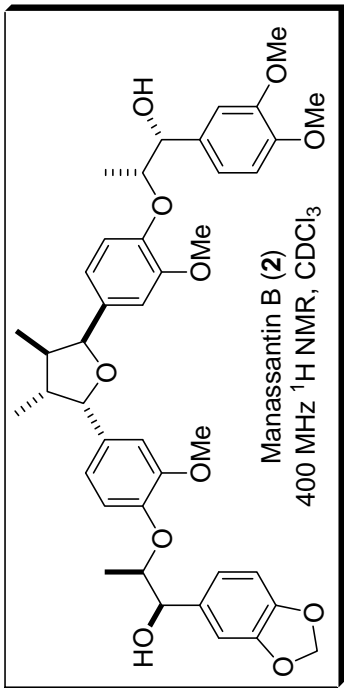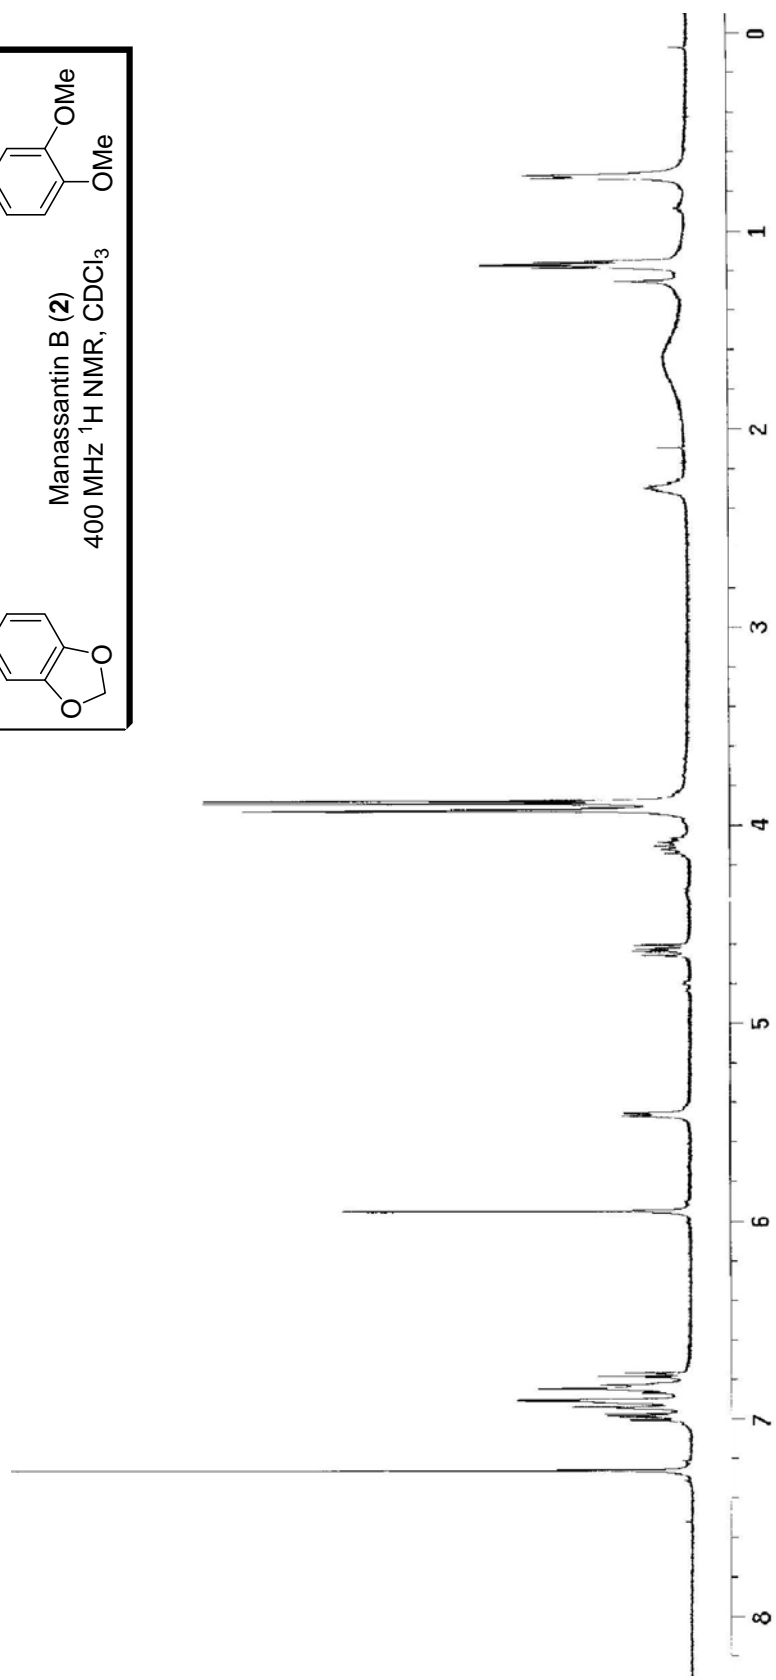

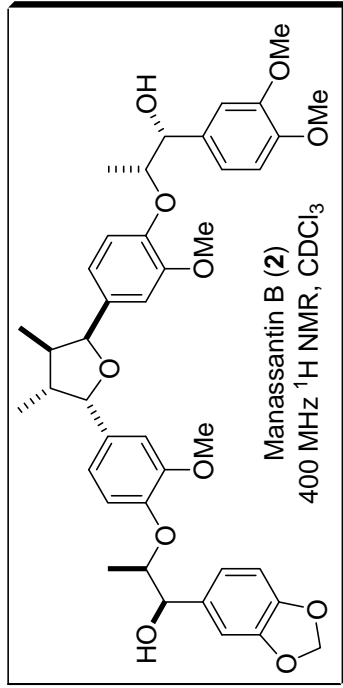

Hanessian's  
Synthetic

Hong's  
Synthetic

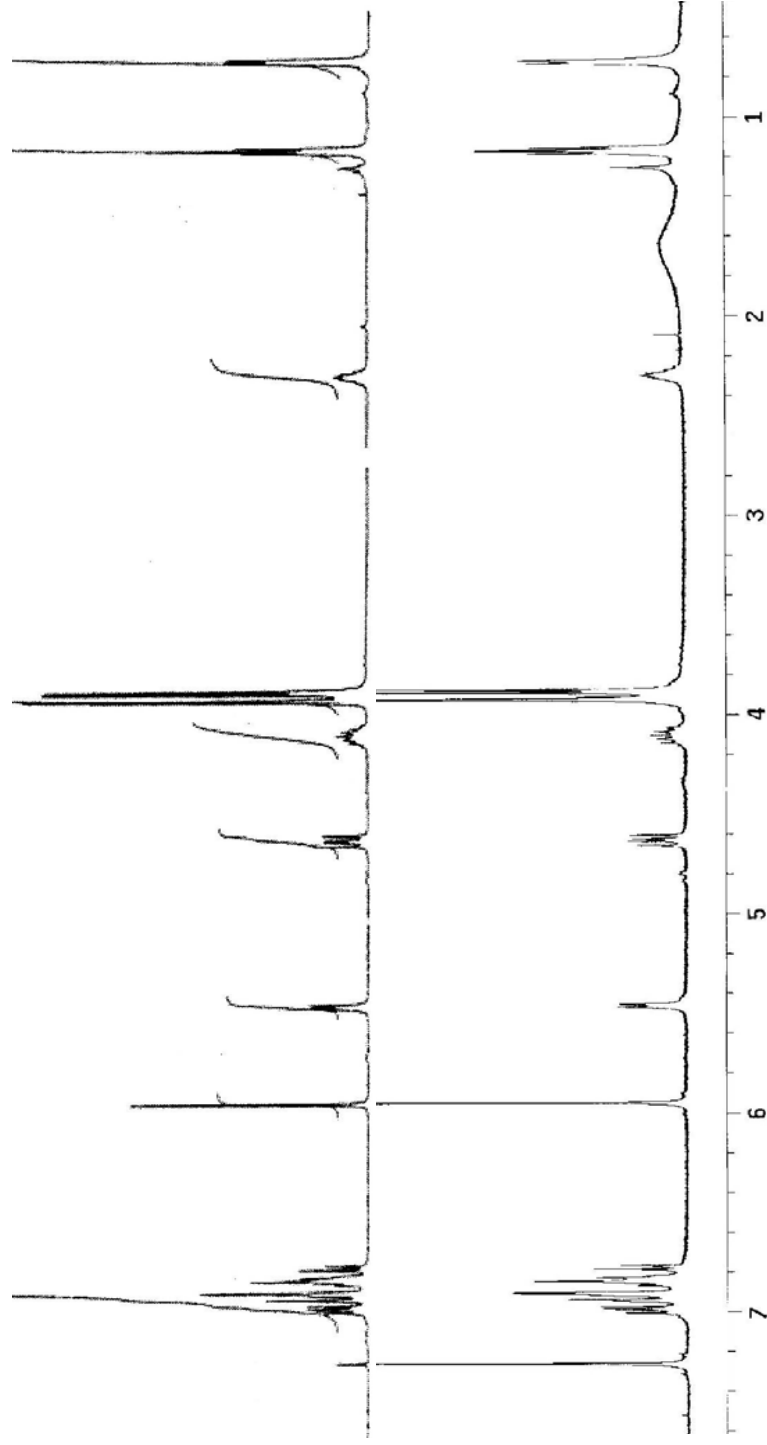

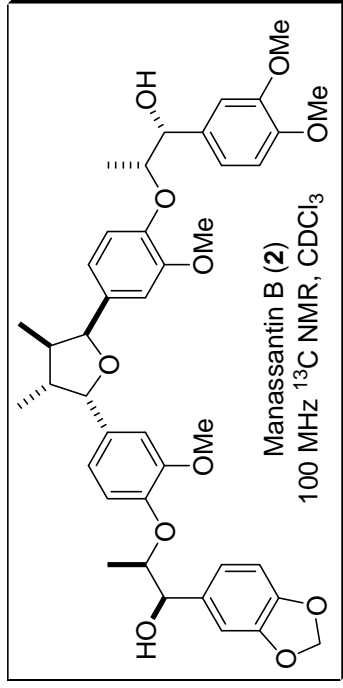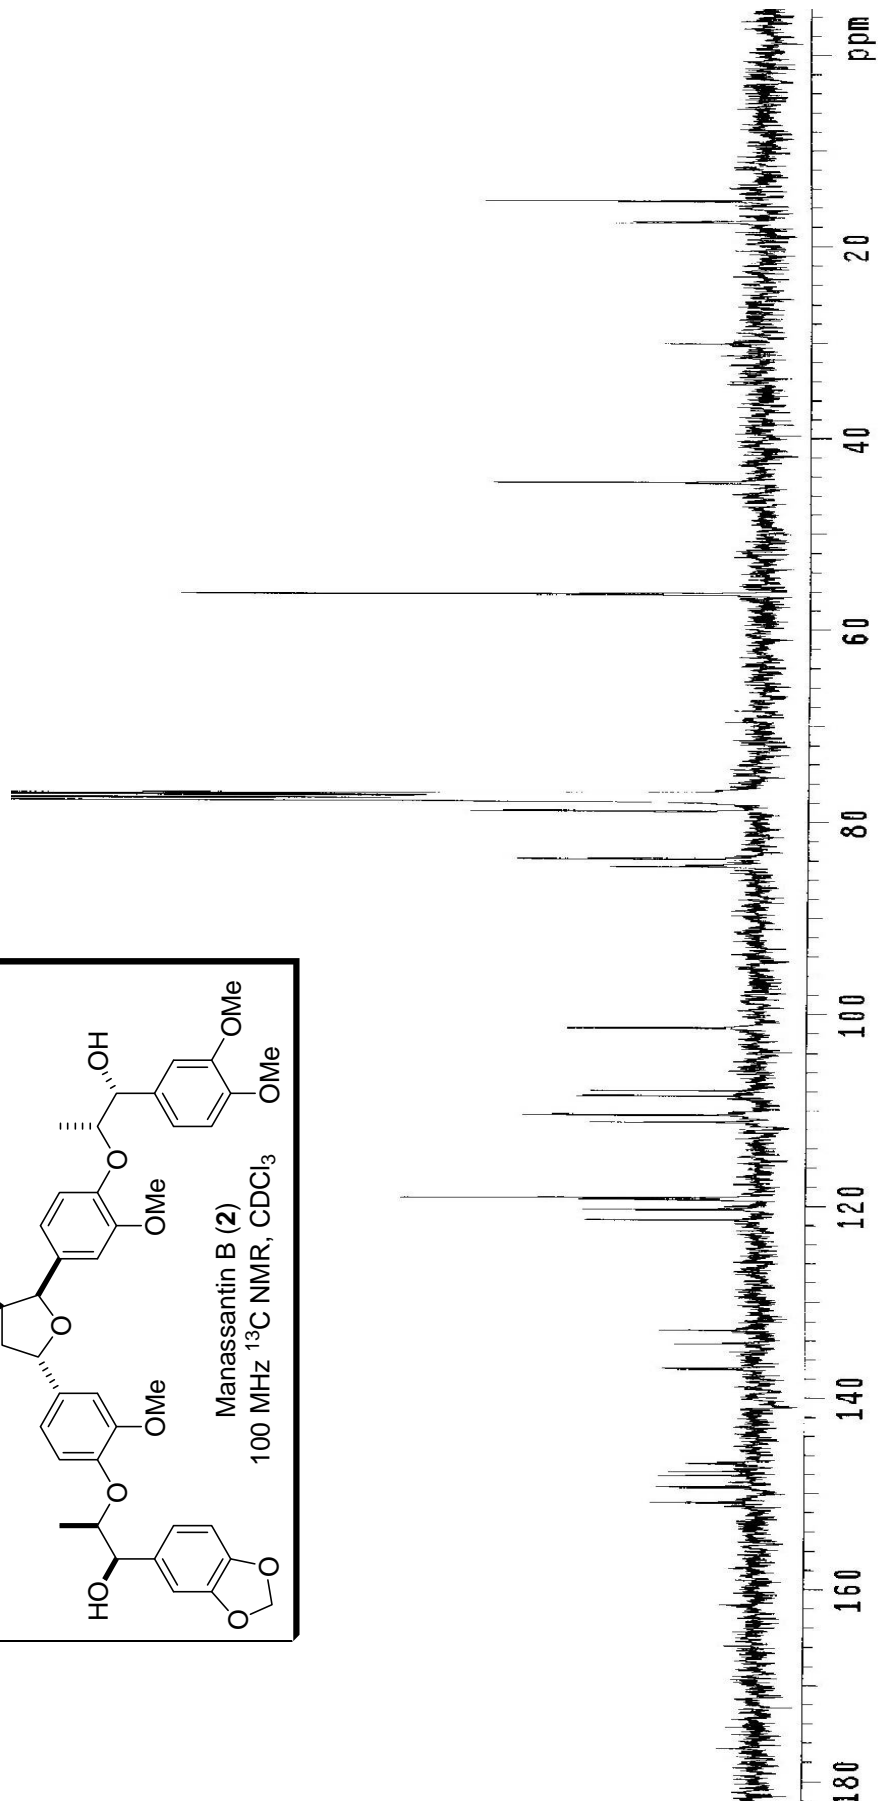

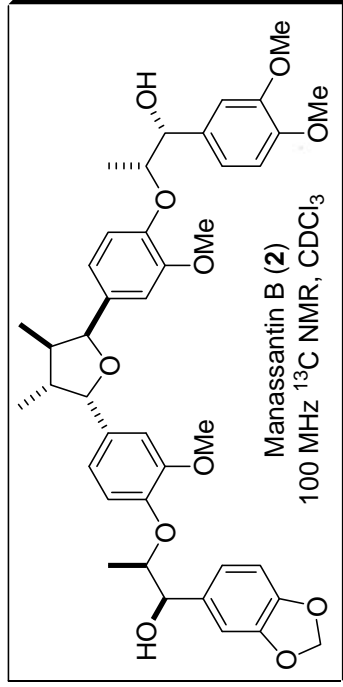

Hanessian's  
Synthetic

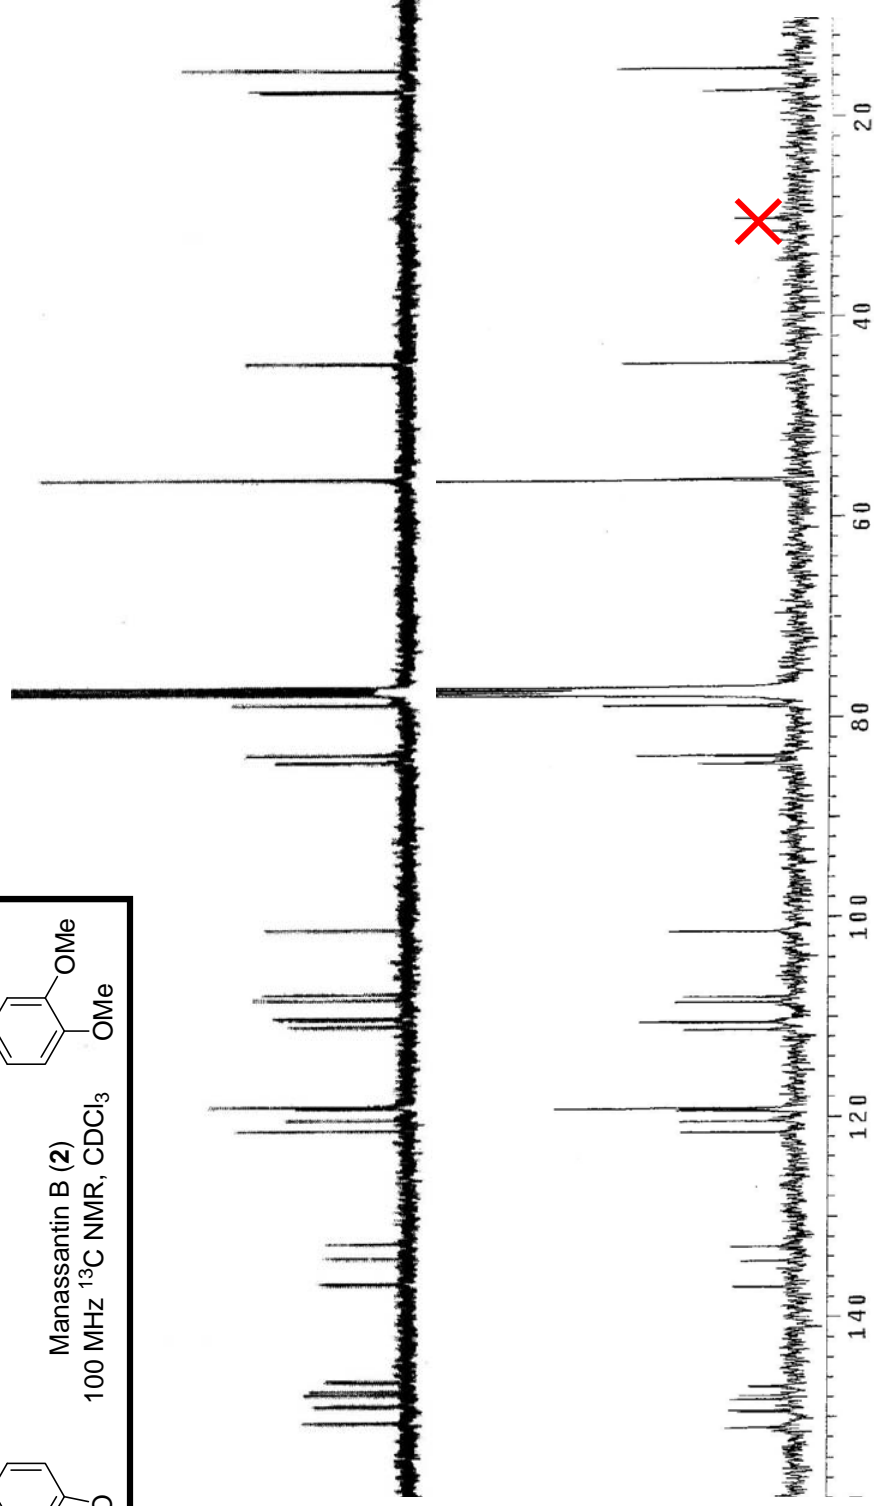

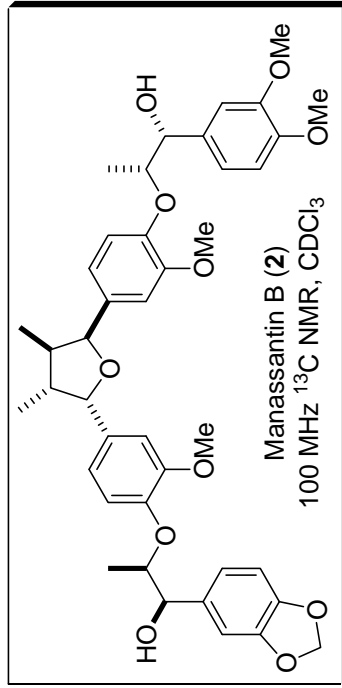

Hanessian's  
 Synthetic

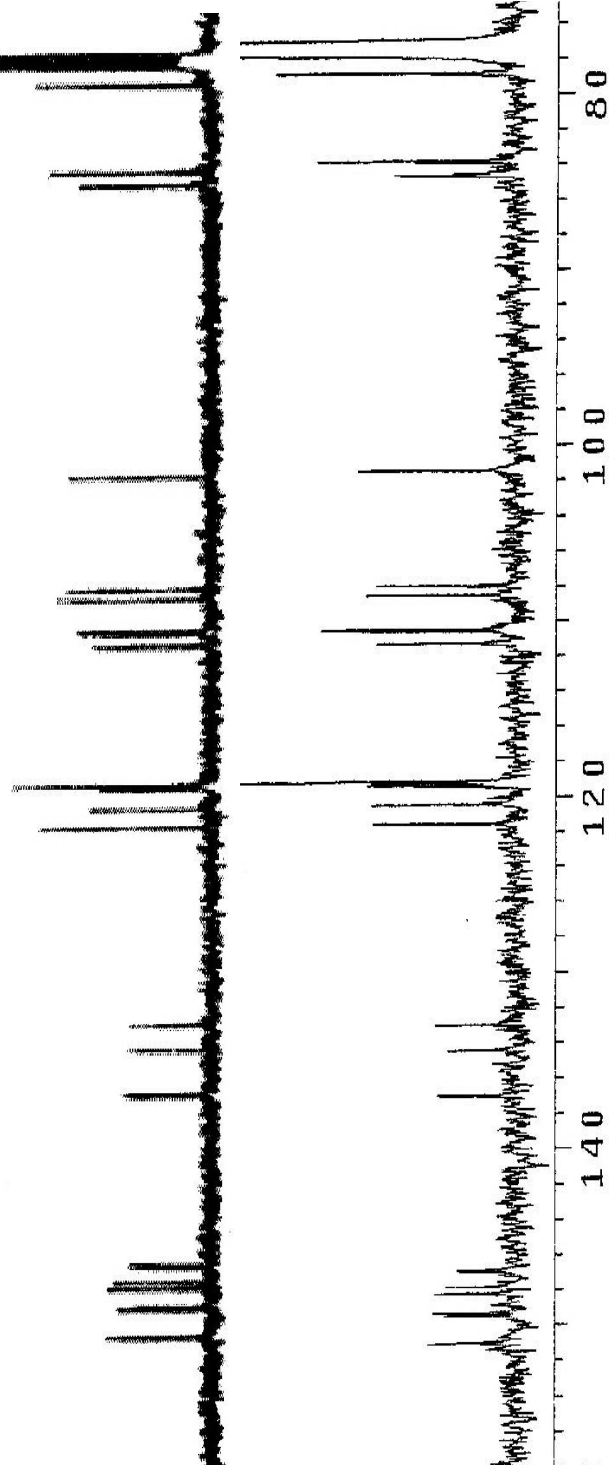

Hong's  
 Synthetic

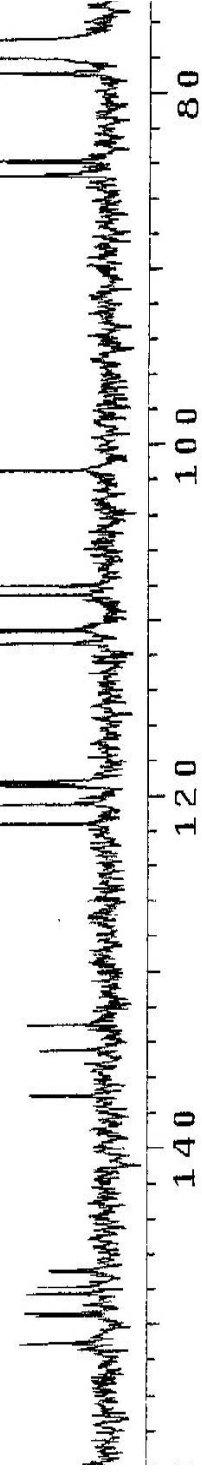

Supplement: NIHMS91472-supplement-1_si_001.pdf [file NIHMS91472-supplement-1_si_001.pdf]
